# Supplementary material for: A spatiotemporally resolved atlas of mRNA decay in the C. elegans embryo reveals differential regulation of mRNA stability across stages and cell types
Source: HighWire-hosted journal article supplement (doi:10.1101/gr.278980.124), 2024-08-01
Supplement: Supplemental_Table_S10.xlsx [file Supplemental_Table_S10.xlsx]

## Sheet: Supplemental Table S10
Supplemental Table S10: Neuron-specific mRNA half-lives
wormbaseID	gene	half_life	lower_limit_half_life	upper_limit_half_life	half_life_coefficient_of_variation	mean_tp0_umi
WBGene00007063	2L52.1	64.8626	43.8201	124.784	0.379572	515.667
WBGene00009583	aagr-3	86.3193	60.8557	148.424	0.320923	869
WBGene00019801	aak-1	23.7137	17.008	39.1485	0.419533	108.667
WBGene00020142	aak-2	35.5056	26.3135	54.5675	0.286085	260.333
WBGene00012928	aakb-2	45.5931	32.8984	74.241	0.427691	412.333
WBGene00013732	aakg-1	38.0683	27.2977	62.8772	0.297493	304.333
WBGene00020633	aakg-2	32.1287	22.0796	58.9653	0.483988	228
WBGene00000001	aap-1	30.2955	21.9491	48.8843	0.425164	111.667
WBGene00000196	aars-1	29.4756	21.5761	46.5009	0.288422	129.667
WBGene00000197	aars-2	75.8315	57.5022	111.314	0.0206919	195
WBGene00000004	aat-3	44.4098	32.575	69.751	0.25435	710.333
WBGene00012714	abce-1	77.2977	47.05	216.45	0.233994	119.333
WBGene00006512	abcf-1	59.465	44.7027	88.7846	0.339674	290.667
WBGene00012097	abcf-2	137.109	76.778	640.046	0.560376	1596
WBGene00018339	abcf-3	65.255	36.5552	303.668	0.470388	242
WBGene00011029	abhd-11.2	32.1543	25.8525	42.5187	0.168969	107
WBGene00022393	abhd-12	37.6253	28.0561	57.1009	0.427906	242.667
WBGene00015146	abi-1	26.3981	20.3985	37.3974	0.340584	426.333
WBGene00000018	abl-1	32.969	26.7614	42.926	0.249359	745
WBGene00022281	abtm-1	50.9193	35.1844	92.1133	0.33728	111.667
WBGene00009920	abts-1	59.4562	40.2111	114.033	0.429653	1044.33
WBGene00009952	acaa-2	46.6459	38.5022	59.1588	0.136759	136.667
WBGene00016655	acbp-1	57.0545	36.8459	126.357	0.19616	65.3333
WBGene00017125	acdh-12	49.7725	37.4435	74.2061	0.233697	118.667
WBGene00001566	acdh-13	16.1156	13.3838	20.2484	0.237379	81
WBGene00020812	acdh-7	46.1785	34.5088	69.7733	0.302718	734.667
WBGene00000036	ace-2	32.8375	25.6192	45.7192	0.260482	102.333
WBGene00000037	ace-3	105.498	55.7022	994.91	0.464952	579
WBGene00016630	acer-1	46.7498	30.8259	96.7058	0.255324	110
WBGene00016601	acin-1	64.6499	50.24	90.6502	0.231336	1703
WBGene00015295	acl-12	35.7852	25.4327	60.3519	0.246893	91.6667
WBGene00019465	acl-14	37.1307	29.2044	50.9625	0.305167	462.333
WBGene00011543	acl-2	25.4451	21.1591	31.9085	0.0530206	105.667
WBGene00018657	acl-4	28.7943	26.0404	32.1995	0.0706564	311.333
WBGene00017261	acl-6	19.5033	17.0497	22.7818	0.0631256	68.3333
WBGene00020264	acl-8	30.6963	23.697	43.5636	0.234062	95.3333
WBGene00022646	acl-9	40.9435	26.8461	86.218	0.369742	241.333
WBGene00000040	aco-1	48.0317	37.6918	66.1894	0.196364	249.667
WBGene00000041	aco-2	56.6915	45.7442	74.5272	0.110596	118.333
WBGene00022037	acs-13	24.5409	18.8177	35.2668	0.335722	361
WBGene00007969	acs-19	22.3072	16.0527	36.5465	0.403421	63
WBGene00018152	acs-4	69.8576	55.8732	93.1795	0.155917	854.667
WBGene00000063	act-1	65.0631	45.1906	116.132	0.438579	1148.67
WBGene00000064	act-2	35.5215	24.19	66.8246	0.450134	1681
WBGene00000065	act-3	90.6518	68.984	132.165	0.260097	946
WBGene00000066	act-4	194.735	132.97	363.657	0.372328	12022.7
WBGene00000068	acy-1	47.5138	39.7739	58.9937	0.163092	268.667
WBGene00017967	ada-2	25.5083	17.7222	45.4967	0.526752	896.333
WBGene00015551	adah-1	53.1464	38.0905	87.8841	0.374753	2328
WBGene00012157	adbp-1	26.302	21.7036	33.3726	0.177478	178
WBGene00000073	add-2	25.3293	19.2944	36.8579	0.15516	69
WBGene00019240	adh-5	57.1795	40.5379	96.9998	0.399355	391.333
WBGene00011128	adk-1	83.214	51.4283	217.871	0.132181	339
WBGene00000074	adm-2	29.4414	21.632	46.0749	0.210944	143
WBGene00000079	adr-1	53.0555	38.1924	86.8573	0.453537	570
WBGene00011064	adsl-1	26.8571	18.0173	52.726	0.458189	90.3333
WBGene00016509	adss-1	122.944	59.2315	-1625.12	0.631248	396
WBGene00000086	aex-3	38.9104	27.6493	65.6479	0.209743	280.667
WBGene00021009	afd-1	63.1738	45.9651	100.979	0.29932	2232.67
WBGene00021912	affl-2	21.6881	15.0768	38.6256	0.409302	149.667
WBGene00000090	age-1	28.4239	20.9594	44.1459	0.127144	146.333
WBGene00012386	agef-1	50.8445	32.3786	118.328	0.37251	346.667
WBGene00011050	agl-1	32.6938	23.7312	52.5345	0.424406	265.333
WBGene00018304	agr-1	72.7982	54.3566	110.179	0.250354	2092.33
WBGene00000092	ags-3	81.4425	52.3724	183.044	0.626664	646
WBGene00000094	agt-2	28.6312	21.6087	42.4159	0.319945	425
WBGene00011767	agxt-1	42.5434	28.3453	85.2405	0.403855	190.667
WBGene00014999	AH9.3	51.5886	36.1699	89.92	0.402831	999.333
WBGene00175029	AH9.7	24.947	19.9027	33.4163	0.212184	117
WBGene00000095	aha-1	26.5971	23.1298	31.2871	0.149223	363
WBGene00019322	ahcy-1	207.45	119.026	806.853	0.544726	313
WBGene00045192	aho-3	27.9213	19.3331	50.238	0.424188	605
WBGene00007235	ahsa-1	87.3781	61.8016	149.071	0.233723	1530
WBGene00015547	ain-1	47.1242	35.8343	68.8004	0.343714	3151.67
WBGene00015007	ain-2	102.768	54.047	1042.79	0.503569	1275.33
WBGene00000097	aip-1	35.9009	25.1145	62.9278	0.392239	473.667
WBGene00010685	aipl-1	47.3236	33.8808	78.4498	0.37274	462.667
WBGene00016966	aipr-1	35.4167	26.9001	51.8245	0.379521	395.333
WBGene00000098	air-1	31.8086	27.6573	37.4261	0.137153	481.333
WBGene00000099	air-2	30.9823	23.0644	47.1786	0.344646	860.667
WBGene00000101	aka-1	37.1473	29.2151	50.9924	0.273958	350.333
WBGene00016977	akap-1	62.2119	45.0977	100.26	0.244113	324.333
WBGene00017088	akir-1	30.9278	22.4703	49.5945	0.435344	1280.67
WBGene00000102	akt-1	60.6952	40.5308	120.789	0.601591	152.667
WBGene00017547	alfa-1	19.8131	16.2948	25.2689	0.241052	111
WBGene00000105	alg-1	42.7322	32.8085	61.2623	0.281449	704.667
WBGene00000106	alg-2	51.6879	40.611	71.0737	0.29341	825.333
WBGene00020820	algn-1	25.4801	21.6556	30.9452	0.181595	80.3333
WBGene00011193	algn-13	28.3892	21.1201	43.2879	0.363869	104
WBGene00010720	algn-3	47.3886	38.3619	61.9703	0.202697	214
WBGene00019276	algn-5	48.835	40.6649	61.1133	0.149741	369
WBGene00000112	alh-6	25.043	20.166	33.0313	0.23522	180.667
WBGene00000115	alh-9	16.798	13.3863	22.5435	0.28489	130.667
WBGene00021783	alkb-1	31.9411	26.1752	40.9648	0.1908	121.333
WBGene00007581	alkb-8	45.8416	31.9268	81.2553	0.334393	71.6667
WBGene00011292	allo-1	27.5865	20.639	41.5847	0.391391	661.667
WBGene00044330	alr-1	32.1271	23.1038	52.7155	0.33498	179.667
WBGene00007010	alx-1	39.6404	27.9593	68.086	0.510852	353
WBGene00000120	aly-1	56.8619	39.9889	98.367	0.38881	2059
WBGene00000121	aly-2	27.2025	19.8334	43.2848	0.410844	352
WBGene00000122	aly-3	71.6667	51.4709	117.945	0.411543	2286
WBGene00000123	ama-1	60.8382	42.1069	109.589	0.329457	1021
WBGene00010284	aman-2	44.0549	35.4225	58.2506	0.128814	653.333
WBGene00016415	ampd-1	38.9154	26.6986	71.744	0.445824	79.3333
WBGene00010272	amph-1	36.9843	30.8505	46.1623	0.202928	410
WBGene00000137	amx-1	19.801	15.1787	28.4714	0.330886	291.333
WBGene00015938	anat-1	60.004	54.4885	66.7619	0.0823915	175.333
WBGene00013038	ani-1	49.8916	36.4048	79.2519	0.457983	1086.67
WBGene00013326	anoh-2	27.5069	20.9887	39.8973	0.343009	450.333
WBGene00006439	ant-1.1	284.849	186.719	600.372	0.375257	11438.7
WBGene00000142	aos-1	25.6907	21.2388	32.5039	0.224802	105.333
WBGene00000161	apa-2	44.0013	35.1676	58.7614	0.123512	635
WBGene00000160	apb-1	74.1769	64.2718	87.6912	0.0624981	838.333
WBGene00000163	apb-3	54.7577	42.3873	77.3239	0.238355	1011.33
WBGene00000145	apc-11	40.6536	30.4435	61.168	0.30633	163.667
WBGene00000143	apc-2	28.5548	23.6211	36.0936	0.212659	248
WBGene00000162	apd-3	51.9526	43.5343	64.4072	0.186619	1035
WBGene00000146	ape-1	22.7252	18.3316	29.8887	0.249481	502.333
WBGene00000158	apg-1	95.6165	63.3562	194.813	0.308846	711.667
WBGene00000147	aph-1	41.8451	32.6052	58.393	0.317037	265.333
WBGene00000148	aph-2	48.4335	33.7341	85.8358	0.32775	517
WBGene00000164	apm-3	44.2142	34.8919	60.3341	0.213052	908.333
WBGene00000151	apn-1	26.0665	18.0598	46.8269	0.574868	126.333
WBGene00000156	apr-1	18.8266	14.9636	25.378	0.258378	494.333
WBGene00000157	aps-2	27.9933	21.4853	40.1572	0.313691	971.667
WBGene00000165	aps-3	26.8555	21.4664	35.8575	0.306062	434.333
WBGene00000179	aqp-11	48.829	30.3415	124.982	0.567929	104.667
WBGene00000180	arc-1	37.3665	27.6247	57.722	0.19788	94
WBGene00016158	ari-1.1	29.2996	25.9031	33.7212	0.104039	246
WBGene00016156	ari-1.3	25.0962	19.4792	35.2651	0.110193	81.3333
WBGene00013538	ari-1.4	34.4285	26.2909	49.8618	0.298037	631.667
WBGene00020462	ari-2	22.1766	18.2611	28.2294	0.126192	206
WBGene00044689	arid-1	43.095	29.3778	80.8422	0.523429	466.667
WBGene00000186	ark-1	34.0214	25.5886	50.7445	0.264642	199
WBGene00000187	arl-1	32.6295	24.0073	50.916	0.38596	202
WBGene00000188	arl-3	59.3228	38.6941	127.062	0.38605	877.667
WBGene00000192	arl-8	56.0872	43.0459	80.4652	0.244512	976.667
WBGene00015145	arle-14	17.0922	11.6131	32.3596	0.500669	77.6667
WBGene00013168	arp-1	63.7478	46.2082	102.749	0.296733	484.333
WBGene00016793	arp-11	18.1535	14.6447	23.8734	0.227954	134.667
WBGene00000195	arr-1	28.5917	21.4622	42.8138	0.370053	431.333
WBGene00020205	arrd-1	40.776	27.5311	78.5799	0.488864	2934
WBGene00007296	arrd-25	30.1464	22.8527	44.2784	0.381045	848
WBGene00014159	arrd-4	37.6795	29.3487	52.6143	0.320317	903
WBGene00000198	art-1	64.9108	45.9359	110.594	0.263459	332
WBGene00000200	arx-2	64.1072	46.1446	104.968	0.348985	517
WBGene00000201	arx-3	114.618	87.1468	167.383	0.279081	952
WBGene00021170	arx-4	32.189	28.3611	37.2113	0.120747	433.333
WBGene00000203	arx-5	44.1641	35.7148	57.85	0.228791	653.667
WBGene00000204	arx-6	100.327	81.5373	130.37	0.210001	887
WBGene00000205	arx-7	20.3111	15.2079	30.5689	0.323507	331.333
WBGene00000206	asb-1	38.5573	26.8193	68.5671	0.349289	138
WBGene00011279	asd-1	62.9882	43.7342	112.53	0.400135	907.667
WBGene00000209	asg-1	43.2285	33.7048	60.2538	0.252227	914
WBGene00000210	asg-2	79.6001	64.6632	103.511	0.183917	656.333
WBGene00012458	ash-2	35.7255	28.3152	48.3893	0.257356	640
WBGene00014025	asna-1	46.266	34.7565	69.1721	0.383274	278.333
WBGene00000217	asp-4	81.058	64.6346	108.671	0.211833	12585.7
WBGene00008107	aspm-1	34.7792	27.6717	46.7997	0.227464	507.333
WBGene00007100	asps-1	21.299	15.9132	32.1955	0.381447	77.6667
WBGene00020368	ast-1	42.9823	36.7004	51.8587	0.10689	2525.33
WBGene00010015	atad-3	22.3462	18.0461	29.3367	0.106476	158.667
WBGene00021059	atat-2	39.7161	27.3434	72.5397	0.0404832	144.333
WBGene00010615	ate-1	48.2572	30.4485	116.248	0.504935	221
WBGene00000220	atf-2	46.2434	36.7939	62.2238	0.242726	1580.67
WBGene00000222	atf-6	53.9698	41.9518	75.6378	0.230472	582.667
WBGene00000223	atf-7	41.8003	37.3716	47.4197	0.0558511	1023.33
WBGene00013878	atfs-1	15.4018	12.0689	21.2779	0.283934	97.6667
WBGene00017045	atg-13	24.8239	18.9505	35.9733	0.385028	516
WBGene00017178	atg-16.1	36.1482	30.2566	44.889	0.173649	300
WBGene00019427	atg-16.2	63.9103	43.7235	118.724	0.297992	485.667
WBGene00018294	atg-18	40.747	32.0646	55.8773	0.298171	789.333
WBGene00019748	atg-2	52.8639	39.8929	78.3337	0.285716	2080.33
WBGene00021922	atg-3	31.8306	24.6689	44.8513	0.30651	335.333
WBGene00013595	atg-4.1	61.0799	47.3474	86.0327	0.2459	726
WBGene00014080	atg-4.2	30.6062	24.2032	41.6159	0.264372	133.667
WBGene00022152	atg-5	29.0722	21.8628	43.3756	0.37863	193.333
WBGene00020706	atg-9	43.5763	32.4139	66.4647	0.322464	456.333
WBGene00015484	atgl-1	15.208	12.0893	20.4951	0.287216	244
WBGene00000224	atgp-1	101.832	56.6757	501.038	0.504089	404
WBGene00000225	atgp-2	31.2099	27.5194	36.0435	0.0730479	158.667
WBGene00008081	athp-1	40.5902	28.6055	69.8583	0.355281	241.667
WBGene00019217	athp-2	52.2198	32.4688	133.318	0.58651	221
WBGene00000226	atl-1	35.6612	27.7877	49.7606	0.235522	260
WBGene00021868	atln-1	56.5968	49.3802	66.2838	0.131456	581.667
WBGene00000227	atm-1	64.0143	37.537	217.266	0.474001	186.333
WBGene00010419	atp-1	97.2144	86.7399	110.566	0.0720061	2059
WBGene00000229	atp-2	110.669	70.8929	252.138	0.528869	2480.67
WBGene00000230	atp-3	88.482	57.2576	194.608	0.507466	2227
WBGene00020275	atp-4	74.8962	54.5857	119.278	0.272888	1690.67
WBGene00007385	atp-5	123.894	73.1826	403.484	0.421909	1708.67
WBGene00010960	atp-6	67.7012	53.2198	93.0096	0.227582	11356
WBGene00006432	atrn-1	45.771	35.6699	63.8528	0.28101	631.667
WBGene00017317	attf-2	65.0399	48.6173	98.2168	0.382386	6344
WBGene00018794	attf-3	23.5721	17.549	35.8902	0.318057	122.667
WBGene00015477	attf-4	28.0198	20.397	44.7401	0.383569	741.333
WBGene00020214	attf-5	40.9148	28.1738	74.6928	0.401444	170.333
WBGene00012474	attf-6	28.4558	21.9382	40.4827	0.359675	283.667
WBGene00000231	atx-2	73.2615	51.7573	125.337	0.283357	866.667
WBGene00009212	atz-1	130.761	83.3817	302.847	0.563497	5328.33
WBGene00044341	ave-1	54.3556	34.1133	133.677	0.847611	173.667
WBGene00007088	B0001.3	42.0183	34.8967	52.7919	0.243763	282
WBGene00007089	B0001.4	51.4903	33.2316	114.28	0.125639	130.333
WBGene00007094	B0019.2	39.4187	28.4777	64.0117	0.318318	110
WBGene00007101	B0024.11	43.4713	27.9179	98.1544	0.457277	325.333
WBGene00015001	B0025.4	24.3358	17.355	40.7118	0.323221	176.667
WBGene00007113	B0035.15	25.4162	23.1338	28.1983	0.0776176	135.667
WBGene00007106	B0035.3	22.0484	16.6612	32.5841	0.370318	82.6667
WBGene00015009	B0041.5	25.698	22.9391	29.2112	0.0933101	327
WBGene00015011	B0041.8	25.6482	18.542	41.5863	0.410991	630.333
WBGene00015017	B0205.1	27.936	22.0913	37.9858	0.12397	224.333
WBGene00015022	B0205.8	45.3345	29.7337	95.378	0.427294	952.667
WBGene00015023	B0205.9	16.0966	12.4986	22.6037	0.213621	132
WBGene00015029	B0207.6	14.0717	10.6216	20.8411	0.398028	100
WBGene00015075	B0238.11	50.3929	37.4513	77.0013	0.391383	1735.33
WBGene00050927	B0250.12	44.3573	29.522	89.1634	0.515748	260.333
WBGene00206505	B0250.18	48.9008	35.7022	77.5819	0.275669	244
WBGene00007121	B0250.4	69.4856	42.3173	194.101	0.419473	188
WBGene00007122	B0250.5	50.8684	38.404	75.3116	0.302585	263.333
WBGene00015091	B0261.1	44.4119	27.9607	107.892	0.519591	237
WBGene00015096	B0261.8	66.9569	55.7503	83.8025	0.188517	862.667
WBGene00015104	B0280.9	26.4727	21.8161	33.6566	0.179717	169
WBGene00007136	B0285.3	51.491	36.7357	86.0565	0.370673	684
WBGene00015115	B0286.1	64.6801	53.2795	82.2879	0.160745	1139.33
WBGene00015125	B0303.3	46.0538	34.9016	67.6794	0.367204	368
WBGene00015126	B0303.4	25.926	21.177	33.4205	0.249412	256
WBGene00007144	B0334.4	27.6446	22.4853	35.8764	0.242697	409.667
WBGene00015150	B0336.13	22.664	15.9003	39.4422	0.453734	99
WBGene00015155	B0353.1	30.7712	25.9033	37.892	0.182026	182.667
WBGene00015157	B0361.3	19.0321	15.517	24.6061	0.203716	167.333
WBGene00015160	B0361.6	20.0565	15.5604	28.2067	0.34071	91.6667
WBGene00007168	B0393.3	23.9057	16.7142	41.9593	0.445573	315
WBGene00007175	B0395.3	42.9978	38.1654	49.2314	0.0896619	126.667
WBGene00015181	B0416.5	114.53	91.9319	151.859	0.150043	1903.67
WBGene00015191	B0432.10	29.8562	21.9452	46.6863	0.363135	186.667
WBGene00007186	B0464.6	32.4614	24.8848	46.6713	0.339778	451.667
WBGene00007193	B0491.6	31.8264	24.4986	45.4087	0.278885	210.667
WBGene00015204	B0495.5	23.5569	18.6909	31.8481	0.213645	90
WBGene00015206	B0495.7	72.3795	45.8034	172.423	0.473876	240.667
WBGene00015208	B0495.9	28.3348	22.5206	38.196	0.260313	522
WBGene00015237	B0511.12	54.4132	39.7693	86.1271	0.238434	888.667
WBGene00015232	B0511.6	106.499	65.0805	292.911	0.708304	1236.33
WBGene00015233	B0511.7	26.2402	19.5512	39.8864	0.392644	276
WBGene00015251	B0546.4	50.5118	42.278	62.7283	0.0648033	239
WBGene00000235	baf-1	54.2461	42.1967	75.9275	0.306066	2457.67
WBGene00000236	bag-1	40.2667	30.5252	59.1399	0.31277	487
WBGene00000237	bam-2	30.3532	25.2506	38.0403	0.178128	146.333
WBGene00000238	bar-1	25.6884	18.2189	43.5387	0.266621	119.333
WBGene00021726	bath-10	30.1178	23.2077	42.8878	0.33135	982.667
WBGene00009945	bath-38	66.4821	49.4551	101.39	0.245784	1582.67
WBGene00013689	bath-40	12.5846	9.85968	17.3909	0.284839	164
WBGene00018137	bath-41	19.3076	14.6087	28.4627	0.354073	193
WBGene00016803	bath-42	18.8926	13.9075	29.4482	0.443193	579
WBGene00015567	bath-44	16.8135	12.4392	25.9331	0.397535	212.667
WBGene00021725	bath-9	24.4165	19.9283	31.5139	0.280642	731
WBGene00001470	baz-2	26.2048	19.6601	39.2813	0.375827	1400
WBGene00000241	bbs-1	47.593	38.3933	62.5908	0.160632	92.3333
WBGene00000242	bbs-2	42.5057	35.5051	52.9449	0.138532	308.667
WBGene00043992	bbs-4	51.9784	38.1018	81.7525	0.224312	282.667
WBGene00010974	bbs-5	59.5604	33.6319	260.034	0.482172	287.667
WBGene00000244	bbs-8	50.8018	34.4156	96.9738	0.387685	256
WBGene00016744	bbs-9	71.2244	42.8969	209.706	0.457824	450.333
WBGene00020441	bcas-2	28.8402	21.6838	43.0471	0.395912	233.333
WBGene00012713	bckd-1A	35.4106	27.2679	50.4869	0.34203	88.6667
WBGene00016192	bcl-7	56.3979	41.9341	86.0929	0.370802	1322.33
WBGene00015268	BE0003N10.3	48.5964	30.237	123.712	0.567984	74
WBGene00000247	bec-1	24.8811	19.8772	33.252	0.274517	403
WBGene00012674	bed-1	27.443	21.1395	39.1032	0.336949	475
WBGene00012943	bed-2	31.6028	23.7745	47.1172	0.362411	815.333
WBGene00000248	ben-1	89.8918	68.6986	129.994	0.261377	2096.33
WBGene00206487	best-19	32.6067	27.9425	39.14	0.094233	130.667
WBGene00022473	bet-1	46.3087	33.0357	77.4107	0.449155	1662.33
WBGene00010199	bet-2	37.5597	29.3299	52.2091	0.318543	1822.33
WBGene00016611	bicd-1	51.058	37.75	78.8577	0.330766	699.333
WBGene00000249	bir-1	58.1986	47.2023	75.8745	0.209284	1392
WBGene00014569	bkip-1	24.2004	16.7741	43.4262	0.447698	248.333
WBGene00011872	blos-1	26.8041	19.6537	42.1332	0.355967	366
WBGene00022251	blos-2	21.7904	15.3784	37.3733	0.534484	137.667
WBGene00010981	blos-8	27.3357	20.174	42.3806	0.344616	869.667
WBGene00010767	blos-9	20.8686	16.6107	28.0616	0.256373	155.333
WBGene00000257	bmk-1	43.6439	33.503	62.5886	0.367154	1243.33
WBGene00017293	bmy-1	33.0234	27.0393	42.4088	0.126087	260.667
WBGene00000259	bpl-1	27.7008	21.3396	39.4649	0.230829	101.667
WBGene00044063	bpnt-1	25.6467	19.9104	36.0261	0.287708	229.333
WBGene00000262	bra-1	37.6567	26.4106	65.5835	0.438664	1174
WBGene00017757	bra-2	60.0052	46.8709	83.3666	0.281673	979
WBGene00017144	brap-2	22.0212	17.8103	28.8397	0.245332	134.667
WBGene00000264	brc-1	25.4502	19.9548	35.1228	0.300847	213.667
WBGene00020316	brc-2	33.983	24.1235	57.4725	0.336622	198.667
WBGene00000265	brd-1	30.9463	27.4833	35.4079	0.137172	326.667
WBGene00000266	bre-1	51.0262	33.8974	103.149	0.272646	372.667
WBGene00000270	bre-5	15.7448	11.6328	24.3531	0.393191	71.6667
WBGene00000271	brf-1	32.7526	27.8815	39.6862	0.136695	229
WBGene00019726	bris-1	21.9289	16.8183	31.5013	0.353733	216.333
WBGene00019888	btbd-10	30.55	23.4572	43.7912	0.308214	133.333
WBGene00000274	btf-1	39.6331	28.2599	66.3262	0.260409	137.667
WBGene00000275	bub-1	24.7005	17.8681	39.993	0.450536	842.333
WBGene00013209	bub-3	40.6679	30.982	59.1644	0.357938	852.333
WBGene00007400	bud-31	23.3962	17.6106	34.843	0.366786	763.333
WBGene00000276	byn-1	81.3751	55.7212	150.806	0.526911	269.667
WBGene00007213	C01A2.1	50.0984	37.3721	75.9674	0.348215	236.667
WBGene00007216	C01A2.4	36.7936	25.3032	67.4012	0.410113	119
WBGene00015280	C01B10.6	55.215	26.1014	-478.452	0.285209	117
WBGene00015283	C01B10.9	34.3666	26.0248	50.5786	0.197023	115
WBGene00015291	C01B12.8	22.1461	17.0746	31.5032	0.296595	354.333
WBGene00015301	C01F1.6	43.4945	35.8872	55.1945	0.124695	136.333
WBGene00007237	C01G10.10	18.9949	13.778	30.5699	0.416971	125
WBGene00007236	C01G10.9	44.6173	33.0232	68.7573	0.282411	184.333
WBGene00007225	C01G6.3	51.4321	41.5283	67.539	0.220071	2746
WBGene00007226	C01G6.4	63.2787	53.8397	76.7309	0.159253	280.667
WBGene00007227	C01G6.5	26.7936	21.3709	35.9038	0.172659	213
WBGene00015328	C02B10.3	37.3351	31.4685	45.8903	0.160733	1498.33
WBGene00015329	C02B10.4	42.1157	33.5375	56.5903	0.290432	1089.33
WBGene00015330	C02B10.5	18.3394	14.9167	23.8004	0.267159	531.667
WBGene00015324	C02B8.6	45.2348	33.8871	68.0086	0.294945	239
WBGene00015357	C02F12.8	18.562	14.4616	25.9078	0.349176	110
WBGene00015352	C02F5.12	35.7386	29.7393	44.77	0.0941755	323.333
WBGene00015346	C02F5.3	77.0761	49.4664	174.44	0.594886	280.333
WBGene00007266	C03A3.1	106.284	67.9558	243.784	0.236609	1172.67
WBGene00015378	C03B1.7	40.3476	28.4271	69.4854	0.328793	270
WBGene00007271	C03C10.5	91.5096	57.4447	224.841	0.785301	4018.67
WBGene00007284	C03H12.1	35.6707	26.491	54.5857	0.319049	351
WBGene00015405	C03H5.3	37.3055	26.7773	61.4765	0.371007	311
WBGene00007286	C04A11.2	30.0236	21.9016	47.7197	0.381984	892
WBGene00015430	C04E7.3	64.6521	42.9278	130.892	0.397501	167.333
WBGene00015450	C04F5.8	49.2186	33.7956	90.5355	0.2613	73.6667
WBGene00007317	C05A9.2	49.1625	35.914	77.8994	0.316285	632.667
WBGene00007329	C05C10.2	41.5294	33.9881	53.3716	0.247081	192.667
WBGene00015481	C05D11.1	38.1673	30.0627	52.2545	0.242055	155
WBGene00015485	C05D11.8	34.7206	27.1355	48.1915	0.335828	202.333
WBGene00015474	C05D9.7	29.176	21.6752	44.6152	0.355723	1299
WBGene00015494	C05E11.3	41.9833	35.7302	50.8894	0.140427	1069.67
WBGene00007348	C05G5.2	30.2842	23.4554	42.7224	0.204123	99.3333
WBGene00007349	C05G5.3	83.4799	47.9662	321.561	0.461372	381.667
WBGene00007351	C05G5.5	37.3313	27.0706	60.1183	0.372716	257.667
WBGene00015501	C06A5.3	32.9485	26.2553	44.2218	0.257443	1083
WBGene00015507	C06A6.2	24.4338	18.8022	34.8814	0.220113	312.667
WBGene00007372	C06B8.7	42.307	33.2993	57.9948	0.21402	657
WBGene00015518	C06E1.1	42.9296	31.014	69.7133	0.447158	2109
WBGene00015529	C06E2.5	14.0252	11.0819	19.0975	0.326382	426.667
WBGene00015539	C06E7.2	38.9682	31.8852	50.0967	0.11044	191.667
WBGene00015541	C06E7.4	25.4719	19.9717	35.153	0.330181	864.333
WBGene00015552	C06G3.6	81.7938	58.8801	133.904	0.297941	1985.67
WBGene00007386	C06H2.2	34.4287	24.377	58.5865	0.415829	122.667
WBGene00015561	C07A12.7	59.5014	40.6979	110.603	0.488598	851.667
WBGene00007405	C07A9.9	17.432	11.2957	38.1646	0.583603	113
WBGene00015569	C07D10.5	89.8627	60.9583	170.896	0.459605	1534.33
WBGene00015579	C07H6.2	26.5554	21.101	35.8127	0.236523	253.333
WBGene00007429	C08B6.8	20.4822	15.7515	29.2741	0.318145	353.667
WBGene00015613	C08F1.10	36.8569	28.812	51.1347	0.292143	7303.67
WBGene00044417	C08F1.11	42.5338	33.0882	59.5269	0.274339	870.667
WBGene00015610	C08F1.6	34.261	24.7081	55.8568	0.352214	2275.67
WBGene00007449	C08F8.9	33.2039	19.3994	115.131	0.251227	67.6667
WBGene00086566	C08H9.16	18.2859	15.3928	22.5181	0.2004	146.333
WBGene00015624	C09B8.5	24.2021	17.0648	41.6021	0.434919	561.333
WBGene00015638	C09E7.4	20.2343	15.8521	27.9649	0.305087	201.333
WBGene00015641	C09E7.7	27.9945	21.7593	39.2383	0.294824	143.667
WBGene00015647	C09F5.1	25.9882	19.9407	37.3005	0.313255	61.6667
WBGene00007499	C09H10.5	25.1542	19.6977	34.792	0.186626	115
WBGene00015702	C11D2.4	28.9772	19.4757	56.5811	0.499517	106
WBGene00007528	C11H1.2	51.6572	34.7401	100.689	0.405364	145.333
WBGene00007531	C11H1.7	55.0757	43.4744	75.1223	0.17275	1301
WBGene00023500	C11H1.9	33.1646	22.3163	64.5376	0.675371	72.6667
WBGene00007548	C13C4.4	33.2692	25.9099	46.4674	0.27461	333.667
WBGene00015740	C13E3.1	38.273	28.7824	57.1013	0.171949	58.3333
WBGene00015746	C13F10.7	45.471	29.7041	96.9114	0.564954	647.667
WBGene00015750	C14A11.5	33.495	28.7012	40.2114	0.122663	192
WBGene00050944	C14A11.9	44.3353	28.7468	96.8591	0.487994	300
WBGene00007574	C14B1.3	28.3405	22.5657	38.0872	0.214705	82.3333
WBGene00007579	C14B1.8	24.8038	19.7552	33.3186	0.281525	520.667
WBGene00007583	C14B4.2	37.1873	26.8125	60.6584	0.270584	133
WBGene00015754	C14B9.8	33.5552	28.4853	40.8206	0.175646	302
WBGene00007588	C14C10.5	24.2277	18.1727	36.3341	0.380823	154.667
WBGene00015769	C14C11.7	31.7588	23.5615	48.703	0.252268	159
WBGene00015782	C14F11.7	46.5974	39.1057	57.6397	0.0878598	74.6667
WBGene00007592	C14H10.2	71.477	50.9701	119.593	0.395538	888.667
WBGene00007602	C15C6.3	22.1964	17.5676	30.137	0.293373	388
WBGene00007606	C15C8.4	24.1636	17.9392	37.0021	0.309832	76.6667
WBGene00015800	C15H9.4	33.7117	23.1416	62.0564	0.353741	138.333
WBGene00015801	C15H9.5	47.4699	41.6775	55.1321	0.101523	156.333
WBGene00015815	C16A11.2	34.1067	25.4101	51.8535	0.243871	95
WBGene00015810	C16A3.5	34.669	26.3968	50.4924	0.370724	386
WBGene00015824	C16B8.4	15.6407	11.8564	22.9733	0.390532	104.333
WBGene00007623	C16C10.2	57.5331	36.3782	137.483	0.532111	98
WBGene00007625	C16C10.4	43.2212	30.2485	75.6768	0.441088	1430
WBGene00007628	C16C10.8	43.0377	29.0747	82.8041	0.600533	212.333
WBGene00015866	C16E9.2	51.1838	32.2891	123.386	0.42237	197.667
WBGene00015868	C16H3.3	77.2422	52.8977	143.099	0.382158	1384.33
WBGene00007641	C17E4.1	111.495	60.3163	736.008	0.511659	243.667
WBGene00219310	C17E4.19	35.5677	26.6657	53.3919	0.0639428	365.333
WBGene00219313	C17E4.20	60.4861	51.7457	72.7792	0.173438	3484.67
WBGene00007645	C17E4.6	28.2202	21.0862	42.6501	0.379487	781.667
WBGene00007652	C17G1.5	84.0468	57.1	159.156	0.449262	150
WBGene00015922	C17H11.2	30.1483	21.4688	50.6088	0.407537	173.333
WBGene00015926	C17H11.6	48.4265	38.2611	65.948	0.235332	505.667
WBGene00015928	C17H12.2	54.0156	38.9286	88.1971	0.255904	239.333
WBGene00015941	C18A3.3	39.9287	30.2044	58.8877	0.256926	347.333
WBGene00007666	C18B12.4	24.3326	17.8063	38.4108	0.368927	193.667
WBGene00015955	C18B2.4	27.662	22.1395	36.8551	0.252347	243
WBGene00015968	C18C4.7	36.8329	24.4146	74.9615	0.352886	213.667
WBGene00007681	C18D11.3	41.0261	34.1757	51.3112	0.169814	266.333
WBGene00007675	C18D4.6	57.7758	35.5975	153.264	0.324328	172.667
WBGene00015972	C18E3.3	25.6666	17.9408	45.0791	0.497136	142.667
WBGene00015976	C18E3.9	17.5712	11.9951	32.8352	0.51587	106.667
WBGene00007683	C18E9.2	65.9341	47.507	107.714	0.322465	2031
WBGene00007684	C18E9.4	46.838	37.4631	62.4711	0.198645	363.667
WBGene00015978	C18F10.7	28.6507	20.1299	49.6797	0.434211	116
WBGene00016009	C23F12.4	75.3401	55.8971	115.523	0.165418	733.667
WBGene00016014	C23G10.7	42.4201	31.8529	63.4796	0.198233	86.3333
WBGene00016021	C23H3.5	32.714	23.8904	51.8727	0.300086	137.667
WBGene00007694	C23H4.6	36.6187	25.5096	64.8674	0.298862	145.333
WBGene00016055	C24D10.4	27.9462	22.3899	37.1704	0.29345	277.667
WBGene00016057	C24D10.6	22.9622	18.452	30.3908	0.201257	171.667
WBGene00007697	C24F3.2	18.0698	13.186	28.6992	0.397958	88
WBGene00016068	C24H10.2	30.1989	22.7073	45.0678	0.340615	150.333
WBGene00016071	C24H12.1	24.7162	19.2993	34.3604	0.285382	888.333
WBGene00016080	C24H12.11	40.1244	26.9979	78.0941	0.412751	213.333
WBGene00016072	C24H12.2	13.0989	10.862	16.4962	0.131425	63.6667
WBGene00023244	C24H12.3	53.5979	35.0485	113.856	0.481849	103.333
WBGene00007705	C25A1.1	46.2477	34.6841	69.3781	0.302398	391.333
WBGene00077526	C25A1.16	87.6451	59.023	170.162	0.175737	694.333
WBGene00016087	C25A11.2	20.287	17.9396	23.3412	0.0880378	72.3333
WBGene00016102	C25F6.1	41.6556	35.8544	49.6963	0.16274	302
WBGene00007730	C25G4.2	76.3158	45.1544	246.267	0.453496	116
WBGene00016120	C25H3.11	40.2607	29.6215	62.826	0.344824	275
WBGene00016116	C25H3.7	44.1124	30.311	80.9888	0.11761	84.3333
WBGene00016118	C25H3.9	60.8347	45.7068	90.9306	0.23832	824.333
WBGene00016129	C26B2.7	19.1042	13.9899	30.1122	0.393906	115.333
WBGene00016131	C26B9.1	26.1384	22.4081	31.3587	0.162657	134.333
WBGene00016135	C26B9.6	35.9155	22.8026	84.5197	0.170897	97.6667
WBGene00007744	C26D10.3	29.5481	17.8758	85.146	0.431496	57.3333
WBGene00016145	C26E6.12	55.3063	39.7768	90.7279	0.301271	240.667
WBGene00016148	C26F1.3	21.2048	16.6315	29.247	0.272589	81.3333
WBGene00044387	C27A2.8	57.6819	38.3856	115.989	0.217025	727
WBGene00007771	C27C12.1	12.1525	9.49724	16.8687	0.261054	109.333
WBGene00007774	C27C12.4	38.1865	35.3794	41.4773	0.072175	302
WBGene00016171	C27F2.10	35.5757	25.6048	58.2653	0.356536	178.667
WBGene00016166	C27F2.4	43.686	30.1974	78.9529	0.385989	148.333
WBGene00043156	C27F2.9	22.101	16.3683	34.0136	0.36058	144.333
WBGene00007787	C27H6.8	37.256	27.511	57.6919	0.371063	165.667
WBGene00016194	C28H8.3	52.8981	36.1913	98.2548	0.38597	314
WBGene00016208	C29E4.11	25.7451	21.164	32.8575	0.154189	129.667
WBGene00016209	C29E4.12	20.4841	15.0941	31.8615	0.357681	545.333
WBGene00043051	C29E4.13	26.3325	18.8685	43.5666	0.424891	178.333
WBGene00007812	C29F7.3	46.5836	40.6684	54.5124	0.16039	835
WBGene00016235	C29H12.2	40.0509	30.2001	59.4391	0.285311	501
WBGene00016237	C29H12.6	28.5865	20.2934	48.342	0.244221	345
WBGene00016244	C30B5.2	27.6673	21.3277	39.37	0.318123	1016.67
WBGene00022951	C30E1.9	65.6995	50.2557	94.8462	0.196647	9533.67
WBGene00007826	C30H6.9	26.596	21.6589	34.4487	0.174339	137
WBGene00007836	C31C9.2	61.2207	45.8158	92.2325	0.384293	385.667
WBGene00007846	C31E10.5	46.3246	34.4643	70.6312	0.430545	271
WBGene00007847	C31E10.6	43.6142	34.1842	60.2289	0.229111	287.333
WBGene00007855	C31H5.4	43.4441	28.9805	86.729	0.247948	538
WBGene00016299	C32B5.6	33.2127	22.3252	64.8271	0.400018	70
WBGene00007863	C32C4.3	127.531	75.326	415.475	0.0489806	76.6667
WBGene00016317	C32D5.10	25.9951	21.6398	32.5454	0.0758102	123.333
WBGene00016318	C32D5.11	31.7673	23.772	47.8663	0.324445	267.333
WBGene00007878	C33A11.2	19.7833	15.788	26.4858	0.297049	205
WBGene00007880	C33A12.1	70.8057	50.9011	116.274	0.356622	1134.33
WBGene00007882	C33A12.3	39.1259	25.6215	82.7311	0.597799	331.667
WBGene00007883	C33A12.4	71.8267	43.8381	198.667	0.325702	840
WBGene00194651	C33D9.13	40.0304	32.2041	52.882	0.254508	1113.67
WBGene00007899	C33D9.5	52.7752	42.3455	70.0217	0.187408	333.333
WBGene00007900	C33D9.6	30.7525	23.0889	46.0308	0.364299	681.333
WBGene00007902	C33D9.9	25.675	17.0359	52.0911	0.59513	121.333
WBGene00016345	C33E10.1	33.0968	22.9428	59.3751	0.315218	104.667
WBGene00023245	C33E10.3	57.6756	42.5997	89.2667	0.285151	186
WBGene00050941	C33F10.14	57.7701	34.3097	182.692	0.234747	138
WBGene00007904	C33G3.4	57.8982	31.8985	313.092	0.092202	101
WBGene00007906	C33G3.6	53.135	42.872	69.8584	0.153676	185
WBGene00016393	C34B2.8	79.5438	57.7912	127.555	0.277109	1550.67
WBGene00007921	C34C12.2	31.1503	22.8896	48.7402	0.33006	477
WBGene00007923	C34C12.4	26.8467	19.2471	44.3629	0.417851	71.6667
WBGene00016400	C34D4.4	28.5982	24.7858	33.7965	0.158471	540.667
WBGene00016411	C34E10.10	52.4359	33.4167	121.704	0.410236	315.667
WBGene00007944	C34F6.10	38.18	28.5202	57.7346	0.294434	81
WBGene00007941	C34F6.7	18.899	12.9965	34.6235	0.567028	74
WBGene00007943	C34F6.9	31.8007	25.51	42.2095	0.296723	263.333
WBGene00007952	C35A5.8	51.9948	37.7748	83.3842	0.332619	427.667
WBGene00016432	C35B1.2	34.8815	26.0846	52.6311	0.306282	234
WBGene00016435	C35B1.5	56.1461	42.5724	82.4267	0.270571	388.333
WBGene00016439	C35D10.1	35.3642	26.4196	53.4654	0.130699	323.667
WBGene00016446	C35D10.10	33.0035	26.3518	44.147	0.246709	333.667
WBGene00016448	C35D10.12	51.7075	37.9976	80.8952	0.168867	98.6667
WBGene00016452	C35D10.17	39.2487	26.9707	72.047	0.538277	121.333
WBGene00016444	C35D10.7	23.2613	16.7495	38.0571	0.504224	90.3333
WBGene00016456	C35E7.4	57.3021	47.561	72.061	0.134096	612.667
WBGene00016457	C35E7.5	57.0765	40.8271	94.8124	0.340589	4523.67
WBGene00016458	C35E7.6	57.8044	43.5144	86.0692	0.30898	1428
WBGene00007970	C36A4.10	35.4463	24.7588	62.3689	0.250773	121
WBGene00044614	C36B1.14	32.4336	26.7505	41.183	0.198965	252.667
WBGene00007976	C36B1.9	38.398	26.0806	72.7621	0.401924	92
WBGene00016469	C36B7.6	59.4091	36.55	158.602	0.852155	65.6667
WBGene00219849	C36C9.10	25.6551	13.8824	168.809	0.442384	247.333
WBGene00016490	C36E6.2	27.6595	23.3333	33.9552	0.207621	362.333
WBGene00007983	C36E8.4	26.0036	21.9448	31.9047	0.183429	126.667
WBGene00016494	C37A2.8	55.0501	38.5989	95.941	0.272248	1563
WBGene00016511	C37H5.13	39.1259	29.8543	56.7502	0.279907	576
WBGene00016508	C37H5.5	75.2021	56.4427	112.639	0.152366	492
WBGene00016520	C39B5.2	20.4088	16.1955	27.585	0.281443	936
WBGene00008035	C39E9.12	21.3251	15.7658	32.9405	0.418982	690.333
WBGene00016540	C39F7.5	24.0325	17.7802	37.0671	0.334025	71
WBGene00016545	C40A11.2	22.4333	17.8222	30.2633	0.326547	501.333
WBGene00016546	C40A11.3	41.5333	31.8535	59.6646	0.240576	295
WBGene00016547	C40A11.4	43.6188	30.1834	78.6104	0.459369	1427
WBGene00016549	C40A11.6	30.6081	24.1191	41.8737	0.260954	1290.33
WBGene00016562	C41D11.3	24.4026	17.9529	38.0847	0.44514	393
WBGene00016567	C41D11.9	40.0556	26.1829	85.1959	0.610786	100.667
WBGene00016590	C42C1.12	18.5022	15.5674	22.8006	0.223104	106.333
WBGene00016591	C42C1.13	25.828	22.2332	30.8095	0.0601991	68.3333
WBGene00206380	C42D4.18	61.1319	40.1456	128.094	0.370978	1349
WBGene00008070	C43D7.8	41.0694	27.6683	79.6453	0.406819	533.333
WBGene00016607	C43E11.9	27.0005	19.2636	45.1236	0.367254	152.667
WBGene00016617	C43H6.4	32.1253	26.04	41.922	0.144461	405.667
WBGene00016619	C43H6.6	39.2168	27.4537	68.6174	0.349736	243.667
WBGene00016635	C44B11.6	64.4102	54.4592	78.8109	0.0554505	174
WBGene00016631	C44B7.11	39.3459	31.9588	51.1748	0.0818442	157
WBGene00016641	C44C1.1	34.3597	25.6268	52.1208	0.259465	114.667
WBGene00008094	C44H4.4	43.4899	32.7329	64.778	0.190759	297.667
WBGene00016661	C45B2.6	52.4238	35.3088	101.739	0.351904	167
WBGene00016671	C45G7.4	19.0718	13.02	35.6352	0.390114	61.3333
WBGene00016674	C45G9.2	17.9251	12.87	29.5204	0.415607	178.333
WBGene00016676	C45G9.5	25.2964	17.2081	47.732	0.544237	173.667
WBGene00044567	C46C11.4	32.8946	24.2622	51.0621	0.384866	395.333
WBGene00008110	C46C2.2	51.5581	32.8538	119.713	0.171159	119
WBGene00008119	C46F11.4	32.2189	24.8482	45.8063	0.289945	403
WBGene00008120	C46F11.5	26.909	19.9964	41.1258	0.364801	236.667
WBGene00008121	C46F11.6	40.5824	32.2078	54.8422	0.221133	919.667
WBGene00016725	C46H3.2	18.5329	14.1659	26.7926	0.350017	190
WBGene00008136	C47D12.2	38.0504	30.7144	49.9905	0.260065	324.333
WBGene00008138	C47D12.4	34.9753	30.0658	41.8009	0.121368	320.667
WBGene00008147	C47E12.2	27.5481	21.5385	38.2088	0.304435	181.333
WBGene00008143	C47E8.4	24.5981	19.2359	34.1055	0.306819	581.667
WBGene00008164	C47G2.3	30.6598	21.5691	52.9959	0.484506	86.3333
WBGene00008165	C47G2.4	49.4665	38.7065	68.5123	0.226673	577.333
WBGene00008168	C48B4.3	40.2459	30.6755	58.4959	0.292661	595.333
WBGene00016746	C48B6.10	58.8036	38.9842	119.615	0.516991	898
WBGene00016740	C48B6.2	28.5627	20.742	45.8506	0.404284	88.6667
WBGene00016741	C48B6.3	31.2084	24.7105	42.3428	0.327388	209.333
WBGene00008197	C49C3.7	37.9774	23.0098	108.659	0.337746	93.6667
WBGene00008198	C49C3.8	33.8787	25.9629	48.7384	0.276954	489.333
WBGene00016790	C49H3.3	54.6403	36.5556	108.138	0.43482	1040.67
WBGene00016792	C49H3.6	21.7433	17.0129	30.1174	0.330622	398.667
WBGene00008219	C50B6.3	29.1266	21.8615	43.6241	0.381921	440.333
WBGene00008222	C50B6.9	37.0165	26.8404	59.6207	0.330074	55.6667
WBGene00008226	C50B8.4	52.6355	39.2548	79.8558	0.0859636	125
WBGene00016810	C50D2.7	48.6954	35.2856	78.5456	0.343172	163
WBGene00016836	C50F2.2	27.9402	20.4723	43.9848	0.428331	259.333
WBGene00008232	C50F4.4	29.5949	21.859	45.8054	0.327752	132.333
WBGene00001910	C50F4.6	31.8816	21.5346	61.3677	0.455022	4018
WBGene00016867	C52B9.4	48.0883	41.0321	58.0754	0.150902	364.333
WBGene00008266	C53A5.6	47.282	31.235	97.2381	0.54172	290.333
WBGene00008273	C53B4.3	25.9393	18.2974	44.5424	0.354073	95.3333
WBGene00016906	C53D5.5	30.4209	24.4603	40.2225	0.198613	247
WBGene00008281	C53D6.4	17.9979	15.5606	21.3406	0.174557	148.667
WBGene00008283	C53D6.6	49.5397	34.13	90.3183	0.399408	241.667
WBGene00008288	C54C6.6	52.9345	29.0085	302.123	0.462497	316.667
WBGene00008310	C54E10.6	30.0652	25.5674	36.4834	0.104862	517.333
WBGene00008330	C55A6.1	20.795	15.592	31.2097	0.260633	112.333
WBGene00008339	C55A6.10	23.3362	17.5368	34.8667	0.33196	174
WBGene00008344	C56A3.5	33.3463	23.3431	58.3516	0.398662	138
WBGene00008345	C56A3.6	33.4901	27.1135	43.7882	0.154134	118.667
WBGene00016965	C56C10.9	27.6213	21.4077	38.917	0.316569	104.667
WBGene00016970	C56E6.2	20.5867	13.803	40.4821	0.494368	178
WBGene00016983	C56G2.15	28.9358	20.6394	48.3851	0.376913	390
WBGene00016979	C56G2.4	31.5412	23.8866	46.4151	0.283213	269.667
WBGene00008348	C56G7.3	32.6995	23.6896	52.7694	0.343359	97.3333
WBGene00000277	cab-1	95.6227	69.7268	152.118	0.327058	1139
WBGene00012230	cacn-1	39.9709	30.8474	56.7579	0.286211	559.667
WBGene00007119	calf-1	50.7113	34.5244	95.4758	0.429819	559
WBGene00009260	calm-1	17.6636	12.1692	32.2032	0.476487	223.667
WBGene00019760	calu-1	83.4593	60.8167	132.963	0.272041	6092.33
WBGene00017240	calu-2	34.1659	29.2099	41.1472	0.163298	672.667
WBGene00000289	cam-1	27.9997	24.3971	32.8506	0.145425	1390.33
WBGene00020251	camt-1	27.2546	20.2222	41.7858	0.442209	111
WBGene00013606	cand-1	60.638	39.2548	133.192	0.371169	435
WBGene00019641	cank-26	31.8251	23.1081	51.1024	0.378776	901.667
WBGene00000293	cap-2	80.9764	56.0901	145.558	0.207945	2014.33
WBGene00009254	capg-1	44.7743	32.286	73.0179	0.37257	979.333
WBGene00010093	capg-2	36.2167	28.1505	50.762	0.315425	538.333
WBGene00012484	car-1	71.1169	46.0764	155.772	0.323858	603.333
WBGene00000800	cars-1	85.5509	50.2961	286.071	0.40198	440.333
WBGene00000294	cas-1	37.233	27.3306	58.3881	0.372737	1116
WBGene00015975	cas-2	23.0485	14.1303	62.4861	0.677706	51.6667
WBGene00012343	casc-3	68.7733	44.1936	154.959	0.506225	993
WBGene00010631	cash-1	32.6078	26.5469	42.2549	0.25954	735.667
WBGene00012341	catp-6	43.0481	36.5453	52.366	0.183779	133.333
WBGene00007514	catp-8	60.6167	44.6906	94.1785	0.255445	988.333
WBGene00000301	cav-1	58.1618	37.6301	128.002	0.535497	42618
WBGene00000366	cbp-1	32.443	24.9643	46.3193	0.273039	2560
WBGene00013866	cbs-1	55.0356	38.388	97.1786	0.342185	116.333
WBGene00000367	cca-1	57.9747	33.4984	215.257	0.241944	68.6667
WBGene00003085	ccar-1	51.3984	36.3008	87.9967	0.35529	2994
WBGene00000368	ccb-1	41.3997	28.3787	76.5005	0.293347	176.333
WBGene00013042	cccp-1	44.7497	33.056	69.2457	0.216354	253.333
WBGene00009258	ccdc-149	44.2776	40.933	48.2174	0.0461385	209
WBGene00014204	ccdc-47	138.491	78.8095	570.582	0.693327	1472.33
WBGene00007627	ccdc-55	35.3967	29.6122	43.9896	0.172521	352
WBGene00000369	ccf-1	36.0661	26.9963	54.3134	0.352408	599.667
WBGene00011527	cchl-1	23.1035	18.6715	30.2943	0.232083	105.667
WBGene00007561	ccm-3	38.1762	32.9809	45.3143	0.116031	232
WBGene00009650	ccnk-1	21.4232	16.4944	30.5528	0.336385	414.667
WBGene00000376	ccr-4	44.4614	39.2025	51.3499	0.0103361	744
WBGene00000377	cct-1	64.4874	49.0058	94.2677	0.178237	686.333
WBGene00000378	cct-2	53.0445	38.5289	85.1085	0.384418	834.667
WBGene00018782	cct-3	100.756	65.3594	219.781	0.504365	316.333
WBGene00000379	cct-4	44.7949	34.0528	65.4374	0.324484	910.333
WBGene00000380	cct-5	93.4269	65.8013	161.034	0.408707	1781.33
WBGene00000381	cct-6	47.9159	33.6466	83.2006	0.400765	645.667
WBGene00020391	cct-7	51.6735	36.161	90.4944	0.35455	938
WBGene00010283	ccz-1	23.3094	16.138	41.9523	0.376012	81.6667
WBGene00000383	cdc-14	50.8239	35.5577	89.0607	0.376349	867.333
WBGene00000386	cdc-25.1	37.1402	26.4795	62.1695	0.266827	89.3333
WBGene00000387	cdc-25.2	21.2664	16.4727	29.9952	0.339164	865.667
WBGene00015235	cdc-26	32.1846	23.9636	48.9919	0.333364	223
WBGene00021097	cdc-37	47.2275	35.6027	70.124	0.37793	761.667
WBGene00000390	cdc-42	44.5517	35.2586	60.4968	0.248629	913.333
WBGene00007352	cdc-48.1	33.2206	24.682	50.7918	0.430454	424.333
WBGene00008053	cdc-48.2	36.4829	28.9907	49.1971	0.213331	317
WBGene00008386	cdc-5L	48.4259	35.0377	78.3726	0.43428	1200.67
WBGene00000382	cdc-6	38.6253	25.5124	79.4725	0.385143	271.667
WBGene00016421	cdc-7	16.7353	13.5994	21.7507	0.257386	106.667
WBGene00018064	cdc-73	39.041	30.4799	54.2897	0.307413	483.333
WBGene00000393	cdf-1	53.6654	38.0191	91.1955	0.0437682	156.333
WBGene00016384	cdgs-1	51.5653	39.6144	73.8417	0.124834	265
WBGene00019994	cdh-1	53.3591	34.9314	112.938	0.392618	214.333
WBGene00022103	cdh-12	27.9851	18.7469	55.1739	0.240741	195
WBGene00000395	cdh-3	49.8484	31.0253	126.745	0.472264	700
WBGene00000396	cdh-4	48.977	37.0071	72.3924	0.267485	4447.67
WBGene00017576	cdh-8	48.3306	27.438	202.599	0.398608	358
WBGene00000401	cdh-9	29.0296	18.5036	67.3334	0.258353	159
WBGene00000405	cdk-1	41.1364	30.8564	61.6882	0.309435	1782
WBGene00015203	cdk-11.1	28.0985	21.7492	39.6834	0.274605	408.333
WBGene00013917	cdk-11.2	29.1705	22.1205	42.8166	0.330152	229
WBGene00007135	cdk-12	28.8053	24.0064	36.0022	0.20879	333
WBGene00000406	cdk-4	22.962	17.9722	31.7876	0.321723	384
WBGene00000407	cdk-5	22.5528	16.8418	34.1242	0.297141	252
WBGene00000408	cdk-7	30.1817	22.5051	45.8067	0.334892	513.333
WBGene00000409	cdk-8	30.9502	25.3005	39.8484	0.263342	654
WBGene00000410	cdk-9	40.1819	29.7273	61.9789	0.351566	261.333
WBGene00013765	cdkr-3	38.4822	27.7667	62.6659	0.133984	205.667
WBGene00000411	cdl-1	59.183	42.2384	98.8304	0.363638	3637
WBGene00000413	cdt-1	94.5783	72.0794	137.497	0.223509	987.333
WBGene00011318	cdt-2	25.8324	21.5429	32.2548	0.19426	93.3333
WBGene00000414	cec-1	88.7528	57.0125	200.221	0.528886	5577.67
WBGene00022831	cec-10	28.3536	21.9261	40.1125	0.217683	151
WBGene00011636	cec-3	45.0776	30.1406	89.3648	0.369199	573
WBGene00017990	cec-4	35.7622	29.46	45.4944	0.219208	1651.33
WBGene00017993	cec-5	66.8075	51.2058	96.0826	0.296077	6860
WBGene00020463	cec-6	28.1833	20.5985	44.6093	0.377762	78.3333
WBGene00012551	cec-7	29.5616	23.2498	40.5777	0.280228	132.667
WBGene00021913	cec-8	47.0714	30.888	98.8772	0.664445	2482.33
WBGene00000415	ced-1	32.1269	26.1427	41.664	0.147258	254.667
WBGene00000424	ced-10	42.9644	34.7111	56.3667	0.161579	238.333
WBGene00000425	ced-11	47.7704	38.1569	63.8596	0.272118	331.667
WBGene00000426	ced-12	33.4138	22.3355	66.2966	0.384746	139.333
WBGene00000416	ced-2	35.8704	28.0876	49.6195	0.254071	249
WBGene00000417	ced-3	28.5907	21.8791	41.2422	0.297455	176
WBGene00000418	ced-4	39.6128	28.4965	64.9491	0.313333	272.667
WBGene00000419	ced-5	29.948	22.4711	44.8817	0.383135	354
WBGene00000421	ced-7	37.9717	31.0241	48.929	0.142819	436
WBGene00000422	ced-8	23.2118	20.9658	25.9967	0.103215	345.333
WBGene00017825	cee-1	26.6457	21.3503	35.4342	0.251931	141.333
WBGene00012584	ceh-100	53.2686	38.0053	89.0196	0.372556	1008.33
WBGene00000437	ceh-13	21.8787	16.3174	33.1907	0.332021	672
WBGene00000443	ceh-20	25.3966	19.1312	37.7643	0.382062	1624.33
WBGene00000444	ceh-21	31.0554	22.5823	49.7053	0.417512	68.6667
WBGene00000449	ceh-27	26.2312	18.8724	42.9963	0.434184	2211.33
WBGene00000451	ceh-30	19.3722	15.2698	26.4888	0.310344	238.667
WBGene00000452	ceh-31	29.039	18.6889	65.0824	0.577668	105.333
WBGene00000453	ceh-32	21.9679	17.9744	28.2427	0.253942	2877
WBGene00000455	ceh-34	104.938	56.5022	735.062	0.499923	195.667
WBGene00000457	ceh-36	34.8906	21.7999	87.3334	0.605019	1206
WBGene00000458	ceh-37	40.6172	29.5712	64.8362	0.35855	1365
WBGene00000459	ceh-38	24.1327	20.6683	28.9924	0.199535	619
WBGene00000461	ceh-40	24.0935	18.2718	35.3599	0.295825	80.3333
WBGene00000463	ceh-43	26.1929	20.7868	35.3991	0.271579	1250
WBGene00000464	ceh-44	31.9599	24.9848	44.3375	0.316199	1799.67
WBGene00022837	ceh-45	14.659	11.8124	19.3132	0.209659	211.667
WBGene00015934	ceh-48	41.9139	36.3863	49.4219	0.127007	1115.33
WBGene00000430	ceh-5	39.0749	33.1067	47.6681	0.169669	1106.33
WBGene00007417	ceh-58	28.1308	20.6202	44.2472	0.392234	812.333
WBGene00000431	ceh-6	27.5907	20.4681	42.3162	0.403444	490.667
WBGene00013876	ceh-74	21.9524	15.3187	38.7194	0.40858	86.6667
WBGene00000433	ceh-8	36.1381	27.3514	53.2425	0.371335	362.333
WBGene00018355	ceh-86	37.8996	28.5351	56.4128	0.323963	812.667
WBGene00009231	ceh-89	47.8744	34.742	76.9682	0.298594	115.333
WBGene00019864	ceh-93	30.8436	24.5032	41.6106	0.276803	156.667
WBGene00000466	cel-1	35.5301	31.6282	40.5302	0.127591	599
WBGene00000468	ces-1	17.8912	12.6021	30.8313	0.447735	616
WBGene00000469	ces-2	42.6771	32.9094	60.6905	0.346139	2248
WBGene00000472	cey-1	113.353	70.9207	282.183	0.376976	8548
WBGene00000475	cey-4	104.169	66.1955	244.331	0.65957	5715.67
WBGene00000476	cfi-1	34.3287	25.3401	53.1996	0.308141	559
WBGene00009668	cfim-1	39.1128	28.6831	61.4615	0.418626	586
WBGene00008362	cfim-2	72.9226	49.0238	142.286	0.476919	609.667
WBGene00009924	cfp-1	32.3595	22.4344	58.0342	0.421858	194.667
WBGene00000478	cfz-2	23.0696	18.9182	29.5552	0.212046	667.333
WBGene00006496	cgef-1	21.6924	15.5447	35.8838	0.396215	291.333
WBGene00000479	cgh-1	47.7936	37.6979	65.2742	0.270542	326.333
WBGene00019127	cgt-3	22.2937	14.6083	47.0422	0.691769	91.3333
WBGene00011532	chaf-1	55.4005	38.7127	97.3762	0.381459	1216
WBGene00022141	chaf-2	23.2398	17.5357	34.4439	0.344952	257.333
WBGene00019946	chat-1	39.4744	29.5781	59.3228	0.297538	569
WBGene00011867	chc-1	52.927	38.5654	84.3319	0.334463	815
WBGene00010942	chch-3	58.4063	41.4182	99.0209	0.398664	637.667
WBGene00010369	chd-1	34.3399	28.4221	43.3699	0.166733	773.333
WBGene00000482	chd-3	48.9654	34.5021	84.3073	0.399048	2889
WBGene00007053	chd-7	49.5745	30.2258	137.759	0.46531	4901.67
WBGene00015687	chdp-1	70.9666	52.6205	108.953	0.329557	10212.3
WBGene00018051	che-10	54.0142	31.7423	181.041	0.489005	1377
WBGene00000492	che-13	82.188	51.6191	201.54	0.571583	386.667
WBGene00000484	che-2	62.5526	38.7909	161.451	0.688838	138.667
WBGene00016642	chil-10	44.2435	34.153	62.7968	0.269837	149.667
WBGene00015267	chin-1	30.8602	23.4717	45.0369	0.333672	146
WBGene00000498	chk-1	30.6961	22.8782	46.6309	0.365036	314
WBGene00011976	chmp-7	24.6166	17.7905	39.942	0.356122	560.667
WBGene00000500	chn-1	27.1158	22.7112	33.6399	0.218451	410
WBGene00000503	cht-1	110.713	86.3904	154.099	0.00848316	1927.33
WBGene00012479	ciao-1	25.0342	19.4305	35.18	0.265368	70
WBGene00000506	cic-1	39.372	30.4781	55.5953	0.309744	407
WBGene00019629	cid-1	39.9065	30.5703	57.4524	0.293014	148.667
WBGene00015347	cids-1	25.0462	19.7615	34.1894	0.297003	247.667
WBGene00009451	cids-2	41.4279	33.3087	54.7811	0.239812	1079.67
WBGene00019543	cif-1	52.0586	36.2826	92.1081	0.5004	301
WBGene00018892	cir-1	51.1643	40.0595	70.787	0.315439	1343
WBGene00044026	cisd-1	36.2027	26.1201	58.9628	0.270279	76.3333
WBGene00010909	cisd-3.1	28.7752	21.8089	42.2805	0.325864	172.333
WBGene00022053	cisd-3.2	49.1575	36.3139	76.0577	0.288097	109.333
WBGene00000507	cit-1.1	28.8393	24.2248	35.6255	0.0976258	180.333
WBGene00000508	cit-1.2	26.0753	22.2062	31.5773	0.17583	277.333
WBGene00000516	cki-1	15.4381	11.1467	25.1026	0.462445	2547.67
WBGene00001051	cks-1	95.251	68.9225	154.128	0.318491	2696.67
WBGene00000519	cku-70	23.0447	16.6822	37.2529	0.442385	84.3333
WBGene00000520	cku-80	61.3854	42.3452	111.537	0.183291	157.333
WBGene00000527	cle-1	55.3584	39.2676	93.792	0.4199	361.333
WBGene00020220	clec-140	41.1849	30.3087	64.2358	0.323486	3097
WBGene00016088	clec-266	117.886	87.2321	181.758	0.183936	15192.7
WBGene00007709	clec-87	36.7042	22.9027	92.363	0.394041	56.6667
WBGene00000532	clh-5	35.805	27.9871	49.6834	0.280197	317
WBGene00020246	clic-1	79.9538	64.8898	104.127	0.172579	1830.33
WBGene00010796	clip-1	67.682	38.2896	291.272	0.489144	281.667
WBGene00000537	clk-2	27.1995	18.1871	53.9172	0.512806	73
WBGene00000542	clp-1	56.2839	37.4774	112.977	0.109054	71
WBGene00000543	clp-2	31.4783	24.2979	44.6827	0.270497	81.6667
WBGene00000548	clr-1	31.9716	29.7625	34.5348	0.0588602	1291.67
WBGene00000549	cls-2	30.0236	24.282	39.3211	0.133599	249.333
WBGene00013847	cls-3	38.593	33.6972	45.1532	0.055059	378.333
WBGene00009127	clsp-1	32.9265	26.19	44.3285	0.292584	608.333
WBGene00000550	clu-1	46.986	29.7525	111.667	0.558584	205.333
WBGene00000552	cmd-1	138.985	100.283	226.334	0.0199833	3828.33
WBGene00000553	cmk-1	47.3067	34.4169	75.6327	0.228008	198
WBGene00016564	cmt-1	20.1937	15.2825	29.7563	0.383372	326.333
WBGene00000561	cnd-1	15.0374	11.5285	21.6171	0.346059	1097.67
WBGene00018474	cnep-1	29.9637	23.883	40.1982	0.151234	242
WBGene00011648	cni-1	55.1125	37.6067	103.11	0.292775	283.333
WBGene00000564	cnk-1	49.3847	29.7432	145.407	0.463204	258.333
WBGene00016879	cnnm-1	41.3261	31.4583	60.214	0.328504	200.667
WBGene00000566	cnt-2	19.6846	15.531	26.8712	0.308787	2260.33
WBGene00000567	cnx-1	59.9663	45.6965	87.1952	0.239549	2707.33
WBGene00018046	coa-3	28.4858	21.5412	42.0387	0.297927	141.333
WBGene00012483	coa-5	19.8236	16.6129	24.5726	0.186362	125.667
WBGene00013893	coa-6	23.6295	20.1577	28.546	0.123636	99
WBGene00016866	coel-1	40.1423	32.7582	51.8241	0.178683	89.3333
WBGene00000584	cog-1	32.1493	27.8681	37.9846	0.0521166	145
WBGene00000585	cogc-2	27.1134	22.1862	34.8538	0.211354	269
WBGene00016608	cogc-5	35.0499	24.2882	62.9357	0.421118	82.3333
WBGene00019481	cogc-6	24.9463	20.0121	33.1098	0.23198	432
WBGene00019820	cogc-8	36.2421	31.6804	42.3384	0.142374	346
WBGene00000591	coh-1	51.9807	37.5909	84.2203	0.261566	1062.67
WBGene00000685	col-111	59.5609	36.4694	162.367	0.607459	333.333
WBGene00000674	col-99	79.7876	46.2248	291.276	0.411146	87.6667
WBGene00008082	com-1	17.6723	13.9874	23.9934	0.169701	72
WBGene00022119	copa-1	67.1994	49.5343	104.448	0.280347	564.667
WBGene00021292	copb-1	51.7025	38.3011	79.5297	0.287892	329.667
WBGene00009542	copb-2	46.2301	37.0132	61.5594	0.267556	298.333
WBGene00015734	copd-1	52.0835	34.4716	106.491	0.494749	684.667
WBGene00009732	cope-1	53.1635	37.0154	94.3036	0.368307	1797.67
WBGene00000763	coq-3	23.9088	16.7868	41.5274	0.387221	379.333
WBGene00000765	coq-5	18.5216	15.8183	22.3395	0.151026	104.667
WBGene00011526	cox-15	30.6372	19.0567	78.0936	0.509695	53
WBGene00012354	cox-4	82.8384	68.8268	104.013	0.157706	3154.67
WBGene00012553	cox-5A	83.6311	58.6376	145.759	0.365398	3836
WBGene00000371	cox-5B	89.8679	72.1539	119.11	0.196928	4363
WBGene00006519	cox-6A	62.4899	46.1426	96.7756	0.311615	1925.67
WBGene00017926	cox-6C	66.9362	46.8471	117.189	0.305693	1430.67
WBGene00009161	cox-7C	73.1952	54.1156	113.055	0.201263	1570.33
WBGene00000773	cpf-1	33.011	26.5102	43.7358	0.24	904
WBGene00000774	cpf-2	34.6546	24.7	58.0501	0.374493	766.667
WBGene00019357	cpg-8	103.336	53.3155	1672.28	0.379289	546.333
WBGene00000534	cpi-2	89.5589	65.0429	143.736	0.316505	6991.67
WBGene00000777	cpn-1	51.5775	37.0592	84.798	0.395025	129.667
WBGene00007221	cpna-3	19.5944	14.0843	32.1864	0.473728	74.6667
WBGene00007044	cpna-5	33.2293	25.2302	48.655	0.197364	109
WBGene00022301	cpsf-1	32.4936	23.139	54.5451	0.430173	316.667
WBGene00017313	cpsf-2	51.7283	39.4931	74.9475	0.283468	611.667
WBGene00013460	cpsf-3	35.3497	24.9868	60.3996	0.435456	255.667
WBGene00044329	cpsf-4	21.0992	14.5813	38.1541	0.531591	482.667
WBGene00012907	cpt-1	97.819	87.4836	110.924	0.061951	1058
WBGene00011122	cpt-2	66.0305	46.1574	115.955	0.329941	247.667
WBGene00020068	cra-1	37.9069	28.3763	57.0768	0.319249	126
WBGene00000792	crb-1	44.2675	29.8122	85.9354	0.384082	499.667
WBGene00000793	crh-1	53.3382	36.1991	101.3	0.163193	145.333
WBGene00016162	crh-2	20.1995	15.2142	30.044	0.362901	370.333
WBGene00010303	cri-3	33.4524	25.0917	50.1691	0.402573	400.667
WBGene00008624	crld-1	44.2372	34.0784	63.0248	0.151741	592
WBGene00017763	crls-1	27.5717	18.647	52.8819	0.409507	131.667
WBGene00007103	crm-1	29.2404	21.3349	46.4538	0.420554	260.667
WBGene00010641	crml-1	49.9326	40.5257	65.0267	0.207516	374.333
WBGene00000794	crn-1	30.8397	22.0939	51.0466	0.392219	541
WBGene00000795	crn-2	32.187	21.0654	68.1862	0.356183	67.3333
WBGene00000798	crn-5	26.2074	17.9394	48.6116	0.451411	116.333
WBGene00000802	crt-1	133.359	83.6634	328.464	0.373329	22175.3
WBGene00021237	crtc-1	55.0825	42.2688	79.0447	0.220336	69.6667
WBGene00008403	csa-1	18.5558	13.2994	30.6828	0.466412	82
WBGene00000803	csb-1	18.2859	15.4255	22.4487	0.19104	77.6667
WBGene00000804	csc-1	34.7004	25.5104	54.2404	0.396746	936.333
WBGene00000812	csk-1	30.8066	22.2842	49.8847	0.395234	319
WBGene00000813	csn-1	39.1266	29.0597	59.8652	0.387887	367.333
WBGene00000814	csn-2	41.2512	32.5703	56.2412	0.303888	505.333
WBGene00000816	csn-4	58.516	35.6292	163.618	0.49013	198.667
WBGene00000817	csn-5	32.8912	26.2535	44.0211	0.281863	430.667
WBGene00000818	csn-6	30.0779	21.4638	50.2417	0.461021	189
WBGene00013709	csnk-1	68.6475	41.7733	192.471	0.426258	662
WBGene00017472	cst-1	43.0078	31.734	66.7056	0.409205	999.667
WBGene00006424	ctbp-1	40.4265	27.9344	73.1293	0.216207	210.667
WBGene00010964	ctc-1	63.2734	39.2996	162.251	0.503723	5658.67
WBGene00010965	ctc-2	53.3303	32.1808	155.576	0.537998	16261
WBGene00010962	ctc-3	61.7716	40.3971	131.181	0.517264	10168.3
WBGene00007068	cTel55X.1	80.1408	62.0989	112.96	0.268096	968.667
WBGene00010676	ctf-18	47.9985	37.6397	66.2239	0.274402	291
WBGene00008921	ctf-4	32.3413	25.5727	43.9826	0.252248	284
WBGene00011915	ctf-8	22.8526	16.0889	39.428	0.406347	436
WBGene00010370	ctg-1	50.4422	39.3716	70.1741	0.11693	282.333
WBGene00022856	cth-2	32.6374	27.7684	39.5769	0.153092	272.667
WBGene00000832	ctn-1	68.2498	34.5698	2651.63	0.443662	396.667
WBGene00019711	ctnb-1	20.4685	15.1956	31.3451	0.355956	214.667
WBGene00007184	ctr-9	47.132	35.9038	68.5787	0.29204	1578.67
WBGene00000833	cts-1	57.7137	39.9568	103.877	0.475854	879.667
WBGene00000834	cua-1	42.4252	30.9988	67.1932	0.308645	91.3333
WBGene00000835	cuc-1	31.3285	22.4992	51.5638	0.38099	547
WBGene00000836	cul-1	30.9922	25.2362	40.1498	0.194152	156.333
WBGene00000837	cul-2	47.907	38.9567	62.1967	0.244004	681
WBGene00000838	cul-3	68.2962	45.2956	138.754	0.379659	385.667
WBGene00000839	cul-4	33.8382	26.6983	46.1911	0.298244	420.667
WBGene00000840	cul-5	28.7155	23.0839	37.9814	0.263985	366
WBGene00013093	cup-14	30.6928	21.1386	56.0066	0.419973	64.3333
WBGene00009627	cup-15	10.8123	9.26028	12.9893	0.18814	46.6667
WBGene00000843	cup-2	37.8554	32.2141	45.8919	0.198867	979.667
WBGene00000846	cup-5	35.7498	25.6079	59.1929	0.288439	112.667
WBGene00022025	cus-2	46.107	29.5484	104.882	0.414569	402.667
WBGene00019426	cutl-16	45.7077	32.8215	75.2531	0.322631	463.333
WBGene00018787	cutl-20	37.3775	30.131	49.2133	0.250907	68.3333
WBGene00021919	cutl-25	67.5563	42.7167	161.422	0.573458	77.3333
WBGene00018256	cutl-28	37.1279	30.3703	47.7533	0.0647976	75
WBGene00017421	cutl-29	46.101	38.8772	56.6217	0.154218	622.333
WBGene00008978	cutl-3	46.5581	29.7649	106.832	0.287427	113.333
WBGene00010893	cutl-9	54.6084	37.1029	103.388	0.266585	385.333
WBGene00011687	cwc-15	28.0637	21.3375	40.9825	0.386031	1285.67
WBGene00017534	cwf-19L1	30.9632	23.2399	46.3748	0.372581	500.333
WBGene00015156	cwf-19L2	33.1263	24.9698	49.1963	0.321195	193
WBGene00000857	cwn-1	41.7214	27.482	86.5835	0.449502	236.667
WBGene00000858	cwn-2	49.0496	34.7218	83.5095	0.0744491	281
WBGene00000863	cya-1	33.8085	26.6234	46.3055	0.292466	1489.33
WBGene00000865	cyb-1	79.3286	59.6173	118.512	0.38591	1639.67
WBGene00000868	cyb-3	98.295	68.4425	174.334	0.32827	4313.33
WBGene00000869	cyc-1	110.974	80.2796	179.668	0.206759	989.667
WBGene00017121	cyc-2.1	188.188	96.5686	3671.95	0.53296	1778
WBGene00000870	cyd-1	19.7005	13.5784	35.8762	0.494959	745.333
WBGene00000871	cye-1	30.0481	22.2977	46.057	0.289229	167.333
WBGene00000872	cyk-1	24.9788	19.1021	36.0784	0.34403	565.333
WBGene00000874	cyk-3	47.309	35.639	70.3428	0.202324	299.667
WBGene00000875	cyk-4	31.2636	24.8413	42.1646	0.264387	1300
WBGene00000876	cyl-1	38.4544	28.6874	58.3052	0.309109	924.667
WBGene00009594	cyld-1	39.4224	27.7636	67.9616	0.365244	58.3333
WBGene00000877	cyn-1	37.6051	28.5652	55.0158	0.282337	322
WBGene00000886	cyn-10	26.6444	20.999	36.4412	0.304893	595.333
WBGene00000887	cyn-11	36.4889	28.0841	52.0729	0.301073	602
WBGene00000888	cyn-12	24.3687	19.32	32.9894	0.309868	301.333
WBGene00000889	cyn-13	37.0243	27.4438	56.881	0.401742	450.667
WBGene00000891	cyn-15	31.7902	25.1934	43.067	0.294127	491
WBGene00000880	cyn-4	28.7412	23.3854	37.279	0.231677	376.667
WBGene00000881	cyn-5	165.727	79.2972	-1842.43	0.562234	9510.67
WBGene00000882	cyn-6	29.7791	23.8108	39.7404	0.103663	174.667
WBGene00000883	cyn-7	52.2109	39.8427	75.7145	0.286836	4152.67
WBGene00000884	cyn-8	50.9452	35.9883	87.1761	0.359988	1320
WBGene00000374	cyp-31A1	65.6831	30.0248	-350.072	0.474727	67.3333
WBGene00007653	cysl-1	72.1364	48.0119	144.989	0.284036	758.667
WBGene00007848	cytb-5.1	76.1369	46.101	218.485	0.496595	1625.67
WBGene00020931	cytb-5.2	123.144	75.6204	331.429	0.362666	593
WBGene00022697	cyy-1	45.21	35.1512	63.3332	0.217749	600.667
WBGene00017643	czw-1	30.4945	23.6618	42.8754	0.260828	119
WBGene00017023	D1022.4	116.055	55.8695	-1502.34	0.597689	120
WBGene00008353	D1025.1	21.495	17.859	26.9902	0.205104	84
WBGene00017025	D1037.1	30.093	23.298	42.4838	0.277864	285.667
WBGene00017031	D1044.6	46.1139	35.1129	67.153	0.265051	135.667
WBGene00008363	D1046.2	20.8397	15.9685	29.9873	0.304969	126.667
WBGene00008370	D1054.1	56.8191	43.2002	82.978	0.0381773	173.667
WBGene00008371	D1054.3	32.0334	22.2796	56.9778	0.488888	128.333
WBGene00017037	D1069.3	45.003	34.2048	65.764	0.231401	356.667
WBGene00008398	D2005.3	31.1312	23.371	46.6067	0.303088	504.667
WBGene00008410	D2023.6	25.1651	19.0753	36.9664	0.26337	56
WBGene00017053	D2024.5	33.9155	24.0639	57.4247	0.456343	289.667
WBGene00008420	D2030.11	33.7087	27.5346	43.4519	0.253194	392.333
WBGene00008412	D2030.2	22.5036	16.0223	37.7907	0.487943	123.333
WBGene00008413	D2030.3	26.3697	18.1671	48.0765	0.444261	85
WBGene00008414	D2030.4	63.7764	41.717	135.345	0.434838	925.667
WBGene00008426	D2045.9	42.2681	29.2285	76.3137	0.205193	151.667
WBGene00271706	D2089.8	19.6324	14.4058	30.8111	0.336624	238.333
WBGene00018976	daam-1	31.432	24.047	45.3636	0.335861	57.6667
WBGene00000894	dab-1	24.4133	17.6719	39.4703	0.424298	146
WBGene00000896	dad-1	40.7012	31.9893	55.9341	0.238951	1630
WBGene00000897	daf-1	42.5897	31.6586	65.0505	0.374476	236
WBGene00000906	daf-10	53.1284	35.3307	107.059	0.372228	429.667
WBGene00000911	daf-15	51.3435	37.357	82.071	0.298684	789.333
WBGene00000912	daf-16	33.2683	24.8753	50.2087	0.364942	643.333
WBGene00000913	daf-18	22.4728	17.8413	30.3518	0.28739	240.667
WBGene00000914	daf-19	41.5514	34.6402	51.9075	0.228269	631
WBGene00000898	daf-2	56.6521	35.3499	142.56	0.402004	227
WBGene00000917	daf-25	38.6927	27.9587	62.8051	0.41227	518.333
WBGene00000899	daf-3	38.9345	27.2072	68.4306	0.573756	299.333
WBGene00000900	daf-4	35.8374	27.2937	52.1671	0.26498	213
WBGene00022599	daf-41	35.8966	24.9432	64.0024	0.449716	2677
WBGene00000901	daf-5	27.3308	19.4516	45.9394	0.432738	105.333
WBGene00000904	daf-8	24.4057	16.5775	46.2426	0.544371	89.6667
WBGene00000928	dao-2	50.5612	21.6013	-148.422	0.49023	274
WBGene00000929	dao-3	113.996	90.9707	152.626	0.213852	239.333
WBGene00000931	dao-5	66.9703	46.4743	119.807	0.453675	1137.67
WBGene00003400	dapk-1	48.8679	38.7122	66.2472	0.264133	78.3333
WBGene00001094	dars-1	50.8739	36.6688	83.0444	0.424674	494.667
WBGene00010664	dbn-1	40.4187	26.3031	87.2308	0.157132	137.333
WBGene00000937	dbr-1	45.019	34.5556	64.5711	0.242108	157.667
WBGene00014054	dbt-1	35.023	27.709	47.5828	0.16526	65
WBGene00014243	dcaf-1	37.5631	25.3288	72.6588	0.434117	260.667
WBGene00021929	dcap-1	63.0147	45.3418	103.264	0.340828	458.333
WBGene00003582	dcap-2	33.0764	25.0286	48.7526	0.296972	248
WBGene00010428	dcn-1	39.6733	31.6208	53.2282	0.0696161	437
WBGene00000938	dcp-66	47.8357	35.8951	71.6804	0.316778	3428
WBGene00000939	dcr-1	68.1115	43.0781	162.603	0.417117	670
WBGene00000940	dcs-1	31.4774	22.6549	51.554	0.391177	253.333
WBGene00015776	dct-1	55.5729	42.4629	80.3935	0.323481	1951.67
WBGene00010890	ddb-1	33.1254	28.857	38.8757	0.166341	174
WBGene00015308	ddi-1	45.4973	31.9474	79.006	0.362247	389
WBGene00019125	ddl-1	25.3808	16.4299	55.7559	0.500749	76
WBGene00000941	ddp-1	39.1819	29.2037	59.5175	0.186102	189.333
WBGene00017381	ddr-2	27.0936	20.6455	39.3989	0.309549	410
WBGene00018967	ddx-15	50.1137	37.3329	76.2012	0.254554	696
WBGene00010260	ddx-17	81.2139	59.8558	126.27	0.280345	2019
WBGene00011580	ddx-19	55.6734	44.2343	75.0925	0.213887	367
WBGene00017162	ddx-23	37.5601	26.5396	64.2325	0.510136	908
WBGene00022148	ddx-27	37.753	24.7617	79.4215	0.460355	188.667
WBGene00011032	ddx-52	48.1822	39.2812	62.299	0.252613	176.667
WBGene00000950	deg-1	63.0739	42.5637	121.734	0.289722	211.333
WBGene00000953	del-2	56.5184	33.6285	176.99	0.473945	348.667
WBGene00009144	del-3	52.2713	28.4856	316.81	0.467821	179
WBGene00018681	denn-4	48.7818	40.536	61.2388	0.18195	177.667
WBGene00009717	dep-1	38.7434	29.217	57.4878	0.203885	172.667
WBGene00020109	der-2	44.8003	29.4485	93.5894	0.476907	161.667
WBGene00017028	dex-1	46.8702	35.7736	67.9463	0.242129	488.667
WBGene00000958	dgk-1	30.9919	21.4172	56.0493	0.471919	245.667
WBGene00000959	dgk-2	35.4293	27.1602	50.9373	0.253293	395
WBGene00000961	dgn-1	43.3219	37.719	50.8797	0.137298	1484
WBGene00007974	dhfr-1	24.1875	17.2629	40.3887	0.32077	185.667
WBGene00008606	dhhc-1	34.4044	26.3873	49.4192	0.274773	428
WBGene00019344	dhhc-10	35.8186	29.0182	46.7818	0.150399	389
WBGene00044071	dhhc-14	40.655	30.3441	61.5798	0.120745	238.333
WBGene00018009	dhhc-3	31.0576	25.7673	39.0815	0.175999	218.667
WBGene00014075	dhhc-4	53.7536	35.5628	110.041	0.477612	346
WBGene00010892	dhhc-6	46.0784	35.4294	65.88	0.191877	224.667
WBGene00007637	dhhc-7	53.1172	35.9527	101.643	0.346492	336.667
WBGene00016620	dhhc-9	40.6618	31.4658	57.4524	0.264498	464
WBGene00000965	dhs-1	25.1978	19.1511	36.8249	0.327899	84.6667
WBGene00000976	dhs-13	41.5059	31.8852	59.4409	0.350807	151.667
WBGene00000985	dhs-22	31.7884	23.8684	47.5745	0.314081	231.333
WBGene00000988	dhs-25	32.8665	23.8273	52.9563	0.270953	97
WBGene00000990	dhs-27	30.0768	20.3268	57.8021	0.323804	115.667
WBGene00000992	dhs-29	25.7999	21.5277	32.1877	0.138199	176.667
WBGene00000993	dhs-30	32.2183	24.7787	46.0422	0.325466	106.667
WBGene00000970	dhs-6	47.4652	41.2657	55.8569	0.0211038	138
WBGene00017735	did-2	30.2848	23.9427	41.1973	0.335814	1043.67
WBGene00000995	die-1	31.8172	24.077	46.8919	0.312755	639
WBGene00000998	dig-1	55.7755	33.3916	169.193	0.350485	220.333
WBGene00008549	din-1	38.1591	26.8424	65.9736	0.472323	4174.67
WBGene00017885	dip-2	23.0863	17.9225	32.4298	0.332258	744.667
WBGene00001001	dis-3	36.9037	30.4685	46.7849	0.17871	346.667
WBGene00001002	div-1	39.6304	30.4499	56.7359	0.318392	811.333
WBGene00012019	dkf-2	62.0711	40.4916	132.897	0.407406	77
WBGene00009082	dlat-1	22.8668	18.2751	30.5401	0.138764	159
WBGene00001005	dlc-1	134.894	74.2337	737.715	0.403174	306
WBGene00010794	dld-1	50.1628	37.3264	76.4554	0.315874	160
WBGene00001006	dlg-1	46.3659	31.8959	84.8666	0.367784	929.333
WBGene00001007	dli-1	56.9088	44.4986	78.9182	0.239047	720.333
WBGene00001008	dlk-1	48.8582	29.0708	152.998	0.29832	83
WBGene00020950	dlst-1	85.2463	57.507	164.683	0.282638	813.333
WBGene00011345	dma-1	23.2546	18.2176	32.1412	0.315838	655.333
WBGene00017326	dmd-5	29.2216	21.4624	45.7679	0.386141	1426.33
WBGene00007058	dmd-6	29.4055	21.043	48.7975	0.361737	121.333
WBGene00019521	dmd-7	63.7323	44.647	111.317	0.44218	110.667
WBGene00001016	dna-2	16.3509	13.4854	20.7628	0.213513	93.6667
WBGene00001017	dnc-1	60.9664	36.6339	181.559	0.585836	1026.67
WBGene00001018	dnc-2	61.3608	42.0178	113.706	0.578183	697.667
WBGene00021149	dnc-3	39.584	28.0791	67.0611	0.375002	724.667
WBGene00022118	dnc-5	17.831	12.4856	31.1798	0.438385	203.333
WBGene00001019	dnj-1	27.9856	23.7579	34.0436	0.177498	446.667
WBGene00001028	dnj-10	33.7389	28.24	41.8971	0.0879684	169.667
WBGene00001029	dnj-11	39.1518	29.3215	58.8976	0.393297	578.333
WBGene00001030	dnj-12	67.3245	56.3432	83.6226	0.0609195	1474
WBGene00001031	dnj-13	16.988	14.2762	20.9717	0.217636	561
WBGene00001032	dnj-14	31.6418	23.5731	48.1083	0.317654	297.667
WBGene00001034	dnj-16	35.0784	26.1824	53.1308	0.270254	418
WBGene00001035	dnj-17	36.589	28.0341	52.658	0.318313	170.333
WBGene00001037	dnj-19	76.4061	46.6362	211.268	0.622067	1598
WBGene00001038	dnj-20	32.8082	28.2444	39.131	0.150555	231
WBGene00001040	dnj-22	19.9925	16.2903	25.8723	0.209681	275.667
WBGene00001041	dnj-23	39.5225	28.8316	62.8142	0.359753	526
WBGene00001043	dnj-25	34.1542	25.8884	50.174	0.345677	192
WBGene00001045	dnj-27	131.373	117.805	148.475	0.0860443	587.667
WBGene00001048	dnj-30	40.9892	29.9359	64.983	0.375053	245.667
WBGene00001023	dnj-5	58.6592	45.592	82.2261	0.322097	936.333
WBGene00001026	dnj-8	49.3187	38.7597	67.7848	0.225113	791.333
WBGene00001027	dnj-9	26.2643	20.4041	36.8468	0.219797	72.3333
WBGene00017163	dnpp-1	49.0704	33.2684	93.4645	0.383946	217.667
WBGene00016074	dnsn-1	21.0146	15.9882	30.6508	0.374436	156
WBGene00001049	dog-1	35.3635	25.517	57.5842	0.436573	213.333
WBGene00007555	dohh-1	123.425	76.437	320.364	0.564943	1603
WBGene00021474	dot-1.1	47.577	37.8674	63.983	0.260599	1153.33
WBGene00001056	dpf-3	53.1569	35.847	102.795	0.363557	132.333
WBGene00001057	dpf-4	49.0273	34.5157	84.593	0.311583	152.667
WBGene00016200	dpff-1	28.6033	24.0512	35.2807	0.22876	1063
WBGene00007576	dph-1	55.9148	38.015	105.671	0.444931	162.333
WBGene00007488	dph-2	30.8416	25.229	39.6661	0.136719	74.3333
WBGene00001061	dpl-1	32.457	24.2222	49.1747	0.424722	572.667
WBGene00022044	dpm-1	39.6564	26.3809	79.8282	0.461574	182.333
WBGene00008532	dpt-1	35.5987	24.5412	64.792	0.481825	250
WBGene00001077	dpy-18	53.9643	40.1503	82.2696	0.418404	289.333
WBGene00001080	dpy-21	31.3512	24.8839	42.3609	0.249031	1001
WBGene00001081	dpy-22	74.907	46.238	197.14	0.443257	3154.33
WBGene00001082	dpy-23	81.7927	54.3167	165.522	0.461258	710
WBGene00001085	dpy-26	40.3056	30.6962	58.6731	0.336593	1232.33
WBGene00001086	dpy-27	28.9861	21.6164	43.9806	0.400122	1928.33
WBGene00001087	dpy-28	51.0807	36.6875	84.0585	0.319379	527.667
WBGene00001065	dpy-3	31.48	18.9095	93.9056	0.524817	87.3333
WBGene00001088	dpy-30	71.4268	49.2751	129.761	0.458749	3771.33
WBGene00016103	dpyd-1	50.3281	40.8101	65.6361	0.156097	214
WBGene00009584	drap-1	35.5842	30.1525	43.4028	0.184798	545.667
WBGene00001089	dre-1	27.441	20.9039	39.927	0.256882	167.667
WBGene00008400	drh-3	51.2687	35.2112	94.2499	0.460463	185.667
WBGene00011730	drr-2	94.1282	67.6877	154.467	0.219031	955
WBGene00009163	drsh-1	21.7345	15.5218	36.2398	0.456318	63
WBGene00019595	dscc-1	25.0909	18.0971	40.8955	0.465628	155.333
WBGene00001101	dsh-1	36.4524	27.8204	52.8509	0.338425	1254.67
WBGene00001102	dsh-2	20.0943	16.7279	25.1568	0.2403	492.667
WBGene00011272	dtmk-1	43.7983	29.2572	87.0762	0.27673	140.667
WBGene00001112	duo-3	25.553	19.429	37.3146	0.293885	139.667
WBGene00013201	dus-2	34.9213	27.9491	46.5282	0.23487	152.333
WBGene00010609	dut-1	56.35	32.9109	195.794	0.363416	103
WBGene00022554	duxl-1	60.0237	46.0414	86.2025	0.339313	684
WBGene00011834	dvc-1	23.9404	16.5812	43.0446	0.540897	85.3333
WBGene00013128	dxbp-1	26.9418	20.9073	37.8732	0.301732	484
WBGene00001115	dyb-1	45.1221	32.1789	75.4838	0.34082	464.333
WBGene00015927	dyci-1	31.5097	23.3052	48.6297	0.195875	91.6667
WBGene00001117	dyf-1	59.8012	36.2227	171.316	0.490468	290
WBGene00001127	dyf-11	48.1225	33.2456	87.0969	0.485208	341.667
WBGene00001129	dyf-13	43.4919	28.8354	88.4481	0.395615	153
WBGene00010349	dyf-18	50.0564	32.6826	106.864	0.298798	153.667
WBGene00012826	dyf-19	52.5968	31.386	162.237	0.475278	253
WBGene00001119	dyf-3	49.7561	30.8832	127.942	0.326846	238.667
WBGene00001121	dyf-5	37.6002	22.8705	105.634	0.716589	293.667
WBGene00001123	dyf-7	42.6044	32.6247	61.3803	0.293973	1066.67
WBGene00008764	dylt-1	54.5143	33.3502	149.19	0.672826	192.333
WBGene00017014	dylt-2	89.3509	66.6491	135.507	0.18806	297.667
WBGene00001130	dyn-1	52.6873	39.5399	78.9333	0.2303	337.667
WBGene00012004	dyrb-1	53.7755	36.2782	103.876	0.266669	156.667
WBGene00001131	dys-1	73.2588	46.7555	169.13	0.366383	406.333
WBGene00017084	E01A2.1	21.9989	16.1232	34.6129	0.343266	217
WBGene00008442	E01B7.2	34.5882	23.8744	62.7454	0.374331	135
WBGene00008446	E01G4.3	11.5866	9.64662	14.5033	0.166578	132.667
WBGene00008447	E01G4.5	83.1291	64.1504	118.056	0.165635	913
WBGene00045410	E01G4.7	25.6296	19.2258	38.43	0.343009	173
WBGene00008450	E01G6.2	46.4116	29.0598	115.195	0.599065	101.333
WBGene00008453	E02A10.3	43.8036	33.5308	63.1511	0.161148	399.667
WBGene00304811	E02D9.3	23.4905	16.7248	39.4484	0.290314	76.3333
WBGene00008455	E02H1.1	101.748	61.9184	285.211	0.796529	410.667
WBGene00008458	E02H1.6	29.498	20.463	52.8188	0.483945	87
WBGene00017011	eaf-1	22.1452	16.1438	35.2489	0.390174	225.333
WBGene00001337	ears-1	77.3095	51.5076	154.908	0.300669	1273.67
WBGene00001338	ears-2	26.1531	22.7752	30.7076	0.0673775	277.667
WBGene00001145	eat-16	80.192	72.1018	90.3272	0.0602275	1885
WBGene00020770	eat-17	24.5947	21.6295	28.5022	0.0947441	58.6667
WBGene00001148	eat-20	53.938	41.3905	77.4028	0.276829	147.333
WBGene00001134	eat-3	25.618	19.9495	35.7864	0.263929	400
WBGene00004140	ebax-1	48.4884	34.4631	81.7634	0.43525	1833
WBGene00012156	ebp-2	39.5649	28.2908	65.7781	0.357982	668.667
WBGene00001153	ech-4	34.3481	27.9087	44.6505	0.22475	192
WBGene00001154	ech-5	19.0269	14.4849	27.7184	0.360141	100.333
WBGene00002297	ect-2	28.9165	20.2961	50.266	0.438295	394.333
WBGene00021551	edc-4	109.314	78.2299	181.387	0.260273	774.333
WBGene00011696	eea-1	34.2118	28.6513	42.4503	0.109523	620
WBGene00017138	EEED8.10	41.7402	33.3469	55.7796	0.273008	398.333
WBGene00017143	EEED8.15	57.5404	47.4509	73.0793	0.22297	4270.33
WBGene00012768	eef-1B.2	84.6626	57.6561	159.262	0.310602	725.333
WBGene00008920	eef-1G	166.428	110.005	341.684	0.247161	2445.33
WBGene00001167	eef-2	365.341	214.303	1237.53	0.227132	4815.67
WBGene00022069	eel-1	44.229	29.8483	85.3501	0.414114	674.333
WBGene00013223	efa-6	23.209	17.6175	33.9999	0.334294	241.333
WBGene00012980	efhd-1	51.5879	39.9222	72.8859	0.263479	776.333
WBGene00001160	efk-1	94.2301	61.1616	205.149	0.486493	273.333
WBGene00001161	efl-1	51.5852	35.7658	92.4975	0.420561	513.333
WBGene00009899	efl-3	27.0764	21.2008	37.4575	0.313951	1157.67
WBGene00001163	efn-2	24.6805	19.901	32.4812	0.245894	935.667
WBGene00001165	efn-4	18.2547	14.7805	23.864	0.301182	221
WBGene00016311	efr-3	31.2337	24.9577	41.7262	0.230745	173.667
WBGene00001166	eftu-2	48.3798	38.9794	63.755	0.257287	969.667
WBGene00017147	EGAP2.1	20.0722	15.5315	28.3646	0.320578	137
WBGene00001170	egl-1	18.8331	12.6342	36.9746	0.620393	164.333
WBGene00001179	egl-10	50.9877	34.608	96.8044	0.304844	184
WBGene00001182	egl-13	61.0437	42.8845	105.876	0.345183	213.667
WBGene00001186	egl-18	28.6595	23.3775	37.0253	0.240608	1098.33
WBGene00001193	egl-26	21.2702	15.1439	35.7205	0.414515	124.667
WBGene00001194	egl-27	22.2109	18.586	27.5924	0.184837	2183.33
WBGene00001196	egl-30	83.555	77.4234	90.7413	0.0441338	4093
WBGene00001207	egl-43	33.9543	26.1434	48.4212	0.30336	242.333
WBGene00001208	egl-44	22.8158	17.1967	33.8896	0.339469	765.333
WBGene00001209	egl-45	56.2398	41.7409	86.1723	0.370383	820
WBGene00001210	egl-46	35.6857	28.2062	48.5634	0.279618	3681
WBGene00001178	egl-9	35.4589	29.4066	44.6481	0.156814	126.333
WBGene00001215	ego-2	42.959	30.9432	70.2314	0.317134	294
WBGene00007772	egrh-1	19.2231	13.3701	34.1907	0.45049	74
WBGene00044651	egrh-3	48.14	34.2544	80.9576	0.422976	139.333
WBGene00009098	ehbp-1	29.8216	21.9931	46.3034	0.350263	288.333
WBGene00001224	ehs-1	46.9491	35.1458	70.6893	0.191895	483.333
WBGene00020868	eif-1	85.4173	60.487	145.307	0.200724	2157.67
WBGene00019162	eif-1.A	37.7945	30.2339	50.3974	0.302616	804.333
WBGene00008480	eif-2A	28.3438	24.8931	32.905	0.0909762	122.667
WBGene00021351	eif-2alpha	43.592	31.7864	69.3483	0.433384	206.333
WBGene00014221	eif-2Balpha	24.1106	19.8431	30.7167	0.236442	276.667
WBGene00008670	eif-2Bdelta	31.6493	22.7448	52.0114	0.369353	278
WBGene00008428	eif-2Bepsilon	22.6368	16.7213	35.0293	0.432469	145.667
WBGene00010560	eif-2beta	37.4965	29.2189	52.3181	0.321683	703.333
WBGene00004090	eif-2Bgamma	27.8034	23.6774	33.6709	0.173689	220.333
WBGene00016113	eif-2D	19.3271	14.7726	27.942	0.153042	94.6667
WBGene00021466	eif-2gamma	93.9633	68.3709	150.177	0.254462	672.333
WBGene00001225	eif-3.B	52.4158	36.3389	94.0052	0.454725	493.667
WBGene00001226	eif-3.C	40.088	31.3897	55.455	0.305647	803
WBGene00001227	eif-3.D	45.6833	36.315	61.5654	0.247161	452.667
WBGene00001228	eif-3.E	40.331	28.8638	66.916	0.394249	189
WBGene00001229	eif-3.F	75.3507	57.1712	110.482	0.300161	278.667
WBGene00001230	eif-3.G	60.721	47.0501	85.59	0.297366	978.667
WBGene00001231	eif-3.H	34.6876	28.31	44.7743	0.214535	255
WBGene00001232	eif-3.I	38.6298	27.8218	63.1692	0.368956	232.667
WBGene00012738	eif-3.J	43.787	30.3601	78.5073	0.395912	492.333
WBGene00001233	eif-3.K	35.3037	27.6872	48.701	0.270115	285
WBGene00015920	eif-3.L	44.4614	31.9248	73.2103	0.296603	376.333
WBGene00001234	eif-6	39.262	33.5817	47.2553	0.191886	471.333
WBGene00009052	ekl-1	39.8851	27.4398	72.9894	0.604352	197.667
WBGene00013676	ekl-4	28.9185	23.1863	38.4158	0.302793	597.333
WBGene00011806	ekl-6	48.087	38.9826	62.74	0.18476	544
WBGene00001235	elb-1	45.3624	32.931	72.8711	0.395924	697.667
WBGene00001236	elc-1	80.3387	57.849	131.437	0.108526	346
WBGene00018330	elks-1	42.1091	30.2661	69.1783	0.287831	539
WBGene00021281	ell-1	40.2443	33.1599	51.1784	0.218108	632
WBGene00001239	elo-1	31.6745	23.8778	47.0314	0.217383	107.333
WBGene00001240	elo-2	42.4301	27.6182	91.5057	0.329478	99
WBGene00001241	elo-3	38.3899	30.251	52.5203	0.255589	367
WBGene00013219	elof-1	30.6543	25.1697	39.195	0.244376	2268.67
WBGene00022463	elpc-1	37.1864	26.4586	62.5461	0.409364	168
WBGene00016128	elpc-4	78.4709	45.7973	273.837	0.459402	81.6667
WBGene00001249	elt-1	26.9337	22.5705	33.388	0.210039	88
WBGene00001253	elt-6	37.5454	28.3467	55.5822	0.239929	236.667
WBGene00001281	emb-27	24.2097	17.7117	38.2386	0.392992	423.667
WBGene00001284	emb-30	35.1726	24.9631	59.512	0.355046	403.333
WBGene00001258	emb-4	68.642	42.4467	179.285	0.378232	726.333
WBGene00001259	emb-5	48.5018	33.2061	89.9227	0.469418	1352.67
WBGene00019209	emc-1	61.1297	43.979	100.208	0.32035	712
WBGene00021973	emc-2	52.207	32.8413	127.234	0.4091	362
WBGene00013378	emc-3	62.7986	40.0026	145.997	0.361999	746.667
WBGene00017999	emc-6	44.9192	32.2402	74.0341	0.48223	276.333
WBGene00001309	emr-1	39.3944	25.9988	81.2656	0.412912	610.333
WBGene00011884	enol-1	79.7069	62.8878	108.807	0.221661	536.667
WBGene00018386	enri-1	21.4025	17.0912	28.6227	0.295919	335.667
WBGene00010730	ensa-1	60.7377	45.0447	93.2109	0.205146	473.333
WBGene00001320	ent-1	73.471	48.368	152.746	0.206309	190.667
WBGene00010701	ent-2	106.466	63.1816	338.066	0.421763	1070
WBGene00009499	ent-6	50.5886	32.9167	109.231	0.32432	283
WBGene00010362	enu-3.1	61.4894	50.4462	78.7226	0.125305	148
WBGene00008003	enu-3.2	63.1335	46.0941	100.159	0.222146	119.333
WBGene00001324	eor-1	28.9621	23.5694	37.5548	0.275825	649
WBGene00001325	eor-2	20.2909	16.1062	27.4134	0.253958	644.667
WBGene00007030	epc-1	38.0304	30.2113	51.3101	0.269084	3214.67
WBGene00021468	epg-2	70.1505	54.8022	97.4404	0.220422	3598
WBGene00012559	epg-3	37.219	23.9698	83.2167	0.418994	124.667
WBGene00018150	epg-4	45.0014	35.0579	62.8189	0.184851	572.667
WBGene00012641	epg-6	33.0704	25.0392	48.6862	0.306317	708.667
WBGene00020334	epg-7	31.1874	26.1196	38.6952	0.198576	875.667
WBGene00013695	epg-8	56.5743	46.5944	71.9944	0.170584	856.667
WBGene00022078	epg-9	58.2432	37.8112	126.717	0.510382	508
WBGene00019487	ephx-1	30.9948	23.5388	45.3641	0.328169	361
WBGene00001329	epn-1	47.4611	35.0179	73.6216	0.361779	1255.33
WBGene00001330	eps-8	61.2424	43.4365	103.788	0.231325	169.667
WBGene00018797	ept-1	33.6078	26.0217	47.4369	0.219244	202.667
WBGene00001331	erd-2.1	117.275	91.0234	164.806	0.224159	1853
WBGene00016195	erd-2.2	48.8193	42.8263	56.7624	0.0772389	917.333
WBGene00020269	erfa-1	54.352	38.2167	94.0684	0.296561	563.667
WBGene00010405	erfa-3	35.777	27.3732	51.6266	0.315959	450.667
WBGene00007589	erg-28	41.9509	30.4855	67.2395	0.300942	137.333
WBGene00019971	ergo-1	37.5213	28.4623	55.0393	0.349009	398.667
WBGene00011892	erh-1	36.8504	26.9054	58.4582	0.361294	1005.67
WBGene00009444	erh-2	22.2992	15.882	37.4181	0.406844	260.333
WBGene00001332	eri-1	25.4459	22.4889	29.2981	0.134999	82.6667
WBGene00007091	eri-12	69.6497	51.0431	109.603	0.275232	1840
WBGene00016566	eri-7	43.9125	31.7995	70.9318	0.309201	126.667
WBGene00016143	eri-9	30.6502	23.2006	45.1467	0.313548	202.667
WBGene00001333	erm-1	47.1583	31.5644	93.2043	0.538896	216
WBGene00001334	ero-1	34.6239	30.7951	39.5401	0.117704	339.667
WBGene00016278	erp-44.1	48.5325	32.3492	97.1173	0.025776	141
WBGene00015510	erp-44.2	29.9653	26.9528	33.7359	0.06167	268.333
WBGene00018371	ess-2	20.2157	15.653	28.5328	0.236787	111.333
WBGene00008429	etc-1	24.5937	20.4272	30.8954	0.221262	202
WBGene00007886	ethe-1	32.3413	22.0403	60.72	0.484343	90
WBGene00001340	etr-1	33.4624	25.862	47.3893	0.292668	729
WBGene00017606	ets-6	35.1302	28.7236	45.2152	0.216412	182
WBGene00009304	eva-1	34.619	30.5379	39.9591	0.0675468	1038.67
WBGene00001352	evl-14	55.4294	34.2631	145.011	0.436247	880.667
WBGene00009372	evl-18	26.8718	20.5	38.9909	0.21295	220
WBGene00001358	evl-20	29.3177	21.929	44.2155	0.295275	84
WBGene00001365	exc-4	69.4647	48.6066	121.68	0.328094	578.667
WBGene00001368	exc-7	48.1489	43.221	54.3452	0.0359221	267
WBGene00017644	exc-9	39.6459	30.8287	55.527	0.288807	889
WBGene00001371	exl-1	38.294	28.6452	57.7446	0.223038	80.3333
WBGene00001372	exo-3	37.0944	25.0578	71.3836	0.552411	125
WBGene00016606	exoc-7	43.1608	32.0682	65.9855	0.404757	236
WBGene00013687	exoc-8	28.409	23.7093	35.4324	0.19583	290.333
WBGene00012966	exos-1	35.9478	26.8377	54.4212	0.374882	147
WBGene00022232	exos-2	36.8854	24.0798	78.781	0.45973	156.667
WBGene00010325	exos-3	21.6408	16.7167	30.6772	0.301618	220
WBGene00000202	exos-4.2	29.602	22.1949	44.4293	0.0990793	77.6667
WBGene00009289	exos-7	40.3302	28.2583	70.4087	0.490982	138.333
WBGene00018305	exos-8	51.5215	46.3156	58.0459	0.0691847	300
WBGene00018154	exos-9	37.2849	30.7323	47.3892	0.170881	174
WBGene00001377	eya-1	18.4481	15.0837	23.7443	0.269109	809
WBGene00008488	F01D4.5	31.4527	25.1837	41.8771	0.26386	200.333
WBGene00017165	F01F1.11	43.8571	22.9986	471.304	0.487542	205.333
WBGene00017169	F01F1.15	53.6694	42.5299	72.7151	0.0758856	238.667
WBGene00008505	F01G4.6	76.8711	53.6304	135.659	0.43879	1165
WBGene00008528	F02E9.1	20.4639	15.3157	30.8258	0.354245	226.333
WBGene00008533	F02E9.10	33.2076	24.9551	49.6149	0.190529	191
WBGene00008530	F02E9.5	34.0144	27.098	45.6715	0.245135	625.667
WBGene00008531	F02E9.7	44.8991	36.3476	58.7123	0.258459	100.667
WBGene00008543	F07A5.4	51.5992	34.9333	98.6748	0.519115	719.667
WBGene00017193	F07C3.2	52.0377	40.4097	73.0612	0.262222	512.667
WBGene00008555	F07C6.4	28.2351	19.5803	50.6021	0.45541	494
WBGene00017210	F07E5.5	160.099	102.447	366.156	0.429695	429.333
WBGene00017220	F07F6.8	28.8547	22.5496	40.0542	0.286541	564.667
WBGene00304813	F07G6.11	12.4429	9.87846	16.8056	0.15527	85.3333
WBGene00008563	F07H5.13	73.6568	50.259	137.817	0.465824	1728.33
WBGene00017239	F08B6.1	15.3216	11.8301	21.7368	0.25488	172.333
WBGene00017243	F08C6.5	64.3745	48.2209	96.8025	0.249398	202.333
WBGene00017275	F08F8.10	34.261	27.2954	45.9998	0.311943	75.6667
WBGene00017274	F08F8.9	48.2384	37.4964	67.6065	0.254432	600.667
WBGene00008585	F08G12.1	45.5282	31.3215	83.3207	0.501955	543.333
WBGene00008576	F08G2.4	16.0442	11.5398	26.3164	0.491329	87.6667
WBGene00008578	F08G2.7	21.9496	16.4417	33.007	0.20229	200.333
WBGene00008622	F09C8.2	79.3175	49.6893	196.462	0.710145	2316.67
WBGene00017289	F09E5.11	29.3307	21.957	44.161	0.33952	303
WBGene00017283	F09E5.3	33.7591	23.8559	57.7198	0.378394	202.333
WBGene00017285	F09E5.7	45.0543	30.9149	83.0288	0.387867	252.667
WBGene00017286	F09E5.8	19.9511	14.9159	30.1181	0.374729	170
WBGene00017309	F09F9.4	26.1093	21.1764	34.0385	0.275047	111.333
WBGene00017311	F09G2.2	27.9221	19.7396	47.6909	0.412117	624
WBGene00017316	F09G2.8	31.6289	24.1901	45.6743	0.30622	381
WBGene00045507	F10A3.17	50.2674	34.7501	90.8237	0.481797	84.6667
WBGene00008645	F10C2.4	24.1295	21.5241	27.4524	0.11349	172
WBGene00008646	F10C2.5	17.7191	14.5984	22.5367	0.247128	154.667
WBGene00008648	F10D11.2	29.4966	21.5301	46.8211	0.357919	577.333
WBGene00017342	F10D7.5	30.2134	24.1445	40.3574	0.194785	104.667
WBGene00017344	F10E7.2	21.5657	15.6265	34.7873	0.451358	196.333
WBGene00017347	F10E7.5	65.534	50.3573	93.805	0.320377	918.333
WBGene00017360	F10E9.11	27.3266	19.7744	44.2121	0.360965	519
WBGene00017358	F10E9.7	22.6275	18.0387	30.3473	0.315948	186.333
WBGene00017373	F10G7.10	43.7346	26.6658	121.519	0.372263	268.667
WBGene00017369	F10G7.5	55.6687	39.5236	94.1129	0.293873	310.333
WBGene00017372	F10G7.9	35.916	24.2377	69.3117	0.439663	402
WBGene00008666	F10G8.8	37.1305	30.9584	46.3762	0.123241	293.333
WBGene00008686	F11A10.5	42.0662	35.6541	51.2904	0.15574	498
WBGene00008690	F11C1.1	25.7321	20.4739	34.6243	0.283844	384
WBGene00045495	F11C1.7	40.5398	32.3913	54.1659	0.236769	576
WBGene00017380	F11D5.1	54.3425	43.4087	72.6387	0.156601	102.667
WBGene00017385	F11G11.5	28.4522	20.1803	48.216	0.370486	119.333
WBGene00008720	F12F6.1	24.9442	19.6233	34.2242	0.330652	1155.67
WBGene00008722	F12F6.7	36.5177	30.3691	45.788	0.212092	211
WBGene00045357	F13A7.14	22.7147	18.5819	29.2115	0.168878	64.3333
WBGene00008729	F13B12.1	45.6142	32.1509	78.4764	0.508127	1326.67
WBGene00008733	F13B12.6	19.8818	15.0177	29.4059	0.306497	120
WBGene00017423	F13C5.2	61.9656	42.0432	117.772	0.533833	8155
WBGene00008745	F13E6.1	89.3099	63.2882	151.671	0.312094	2760.33
WBGene00008760	F13E9.11	59.6384	52.5322	68.9678	0.0738692	6541
WBGene00008768	F13G3.10	35.9531	25.1561	62.9871	0.325118	156.667
WBGene00008766	F13G3.6	53.6571	39.4644	83.7908	0.403405	159.667
WBGene00008767	F13G3.7	27.7736	22.1925	37.105	0.215112	355.667
WBGene00008774	F13H10.3	23.2927	19.6576	28.5773	0.206032	91
WBGene00044784	F13H10.8	33.5809	26.4656	45.9291	0.276008	358.333
WBGene00045056	F13H10.9	29.9877	19.2048	68.3818	0.702056	109.667
WBGene00017435	F13H8.2	30.2204	25.9773	36.1203	0.118388	246.667
WBGene00008800	F14E5.2	38.8817	32.8172	47.6956	0.206771	350.667
WBGene00008838	F15A4.2	26.2821	18.8554	43.361	0.427857	225
WBGene00045418	F15B9.10	57.7529	37.0959	130.325	0.366818	170.667
WBGene00008859	F15D4.2	64.1621	40.8853	148.978	0.2547	102.333
WBGene00008865	F15G9.1	120.406	67.9509	527.977	0.249684	1835.67
WBGene00008880	F16B12.4	40.2684	28.2488	70.092	0.364473	228.333
WBGene00008882	F16B12.6	26.019	21.8713	32.1082	0.191398	540.333
WBGene00017513	F16F9.1	61.2233	40.4871	125.501	0.329926	101
WBGene00008904	F17A2.13	11.2258	9.68184	13.3557	0.204529	60.3333
WBGene00017536	F17A9.4	52.547	41.7566	70.8576	0.182969	444
WBGene00008924	F17E5.2	45.2713	37.0735	58.1237	0.198849	118
WBGene00008925	F17H10.1	17.3893	13.7839	23.5489	0.318898	193.333
WBGene00008932	F18A11.5	39.5743	26.7976	75.6367	0.329606	90.6667
WBGene00008934	F18C12.3	40.0779	27.3991	74.5969	0.492384	304.333
WBGene00017563	F18C5.10	58.2148	46.5817	77.5925	0.185568	821.667
WBGene00008939	F18H3.1	30.7126	24.2322	41.9244	0.289694	515
WBGene00008940	F18H3.4	22.5321	17.6059	31.2859	0.272092	123
WBGene00017583	F19B10.1	27.3506	22.6004	34.6289	0.214759	311.667
WBGene00008948	F19B6.1	43.1739	29.2907	82.0769	0.30073	190.333
WBGene00008951	F19C6.2	34.5827	25.6981	52.8569	0.326543	434.667
WBGene00017607	F19F10.11	43.1625	30.7709	72.2632	0.274326	131
WBGene00008970	F20C5.5	30.8535	23.9882	43.224	0.238027	72.3333
WBGene00008971	F20C5.6	62.2385	39.237	150.414	0.433522	1407.67
WBGene00008975	F20D1.3	68.5758	50.0387	108.929	0.378377	256.667
WBGene00017642	F20D12.2	25.7949	21.0655	33.2627	0.232627	531.333
WBGene00008986	F20G2.2	64.0677	39.8303	163.655	0.630133	155.333
WBGene00017659	F21C10.10	31.5462	23.7865	46.8196	0.364513	849.333
WBGene00009009	F21D5.4	23.2785	17.0736	36.5682	0.369913	66.6667
WBGene00009010	F21D5.5	44.7509	30.0738	87.4102	0.311523	83
WBGene00009011	F21D5.6	48.4934	37.3042	69.2709	0.213606	154
WBGene00009014	F21D5.9	22.0756	16.1241	34.991	0.409347	291
WBGene00219452	F21D9.11	59.0117	42.1821	98.1855	0.390587	153.667
WBGene00009020	F21D9.6	20.4107	14.2223	36.1328	0.458094	370
WBGene00017675	F21F3.6	52.6801	43.0588	67.8382	0.199333	741.667
WBGene00017676	F21F3.7	33.5961	28.266	41.4035	0.217639	412.333
WBGene00009027	F21G4.6	31.382	24.6513	43.1686	0.208099	194.333
WBGene00009045	F22B5.10	103.913	68.746	212.737	0.386075	554
WBGene00009049	F22B8.7	37.4773	26.3742	64.7253	0.436012	174.667
WBGene00009050	F22D6.2	26.1739	20.8207	35.2326	0.25735	1146.67
WBGene00009054	F22D6.9	48.9908	30.4076	125.984	0.27593	82.6667
WBGene00017713	F22E5.20	68.483	48.4821	116.575	0.271503	320
WBGene00009065	F22G12.5	45.9315	31.4077	85.443	0.369543	218.667
WBGene00044638	F23A7.8	19.0803	12.4262	41.0767	0.465907	71.6667
WBGene00009084	F23B12.7	35.8552	29.3013	46.1855	0.218015	340.667
WBGene00017732	F23C8.3	42.9855	30.255	74.212	0.294358	71.6667
WBGene00017734	F23C8.5	37.916	31.3768	47.8983	0.204936	243
WBGene00017745	F23F1.4	44.0026	27.2218	114.724	0.826765	75
WBGene00306069	F23F12.17	17.1121	11.1829	36.4243	0.701893	112.333
WBGene00017758	F23H11.2	36.1131	25.8984	59.6333	0.276184	113.667
WBGene00017760	F23H11.4	26.4961	20.0334	39.1138	0.0833172	127.333
WBGene00000263	F23H11.5	52.338	36.56	92.0739	0.540527	88
WBGene00017767	F25B4.4	17.6216	12.9923	27.376	0.409182	113.667
WBGene00017777	F25B5.6	43.7129	37.2126	52.9649	0.0961866	133.333
WBGene00017782	F25E5.1	27.0832	21.1758	37.5618	0.276865	145.333
WBGene00017799	F25G6.8	28.3187	20.3203	46.7008	0.485536	195.333
WBGene00017800	F25G6.9	23.4493	18.1988	32.9579	0.25998	133.333
WBGene00009118	F25H2.4	28.7161	20.9055	45.8446	0.440622	966
WBGene00009120	F25H2.6	30.4216	24.0151	41.4898	0.254036	283.667
WBGene00009131	F25H8.1	29.5882	20.2817	54.6779	0.395317	172
WBGene00009132	F25H8.2	28.9137	20.8682	47.0553	0.28471	339.667
WBGene00009138	F25H9.6	29.1717	23.2528	39.1326	0.287667	239.667
WBGene00009139	F25H9.7	30.2087	22.3199	46.7223	0.329921	113.667
WBGene00017801	F26A1.1	21.0717	16.0093	30.8161	0.382178	460.667
WBGene00009140	F26A3.1	47.0685	29.4464	117.216	0.74057	151
WBGene00009145	F26A3.7	24.6219	19.9308	32.2011	0.273066	166.333
WBGene00009159	F26E4.4	22.834	16.9888	34.8111	0.273202	264.667
WBGene00009162	F26E4.7	42.8182	25.8859	123.793	0.618421	81.6667
WBGene00017834	F26F12.3	100.247	66.6497	202.149	0.39062	3753.33
WBGene00009172	F26F2.7	21.3969	15.6576	33.7784	0.456501	75
WBGene00017831	F26F4.12	32.6962	20.2544	84.7661	0.333249	90
WBGene00017828	F26F4.6	31.7966	23.5456	48.95	0.154828	120.667
WBGene00005011	F26F4.8	20.7147	14.6465	35.368	0.451029	375.333
WBGene00017829	F26F4.9	28.2934	21.3018	42.1169	0.286367	108
WBGene00017837	F26G1.1	58.3998	44.7852	83.9074	0.31285	116.667
WBGene00009174	F26H9.2	22.2286	17.2556	31.2284	0.312037	323.667
WBGene00009177	F26H9.5	22.5347	18.3104	29.2925	0.125802	80.3333
WBGene00017852	F27C1.2	113.406	65.2475	432.99	0.375355	1337.33
WBGene00017854	F27C1.4	14.9284	10.0412	29.0842	0.533996	127.667
WBGene00017855	F27C1.6	28.0773	21.156	41.7292	0.372923	408
WBGene00009187	F27D4.1	36.3233	25.5276	62.9413	0.419259	136
WBGene00009189	F27D4.4	35.7381	24.608	65.2504	0.398853	446.333
WBGene00009191	F27D4.7	26.2713	23.3863	29.9682	0.0587873	297
WBGene00009200	F28C1.1	27.1165	21.5094	36.6777	0.287224	519.333
WBGene00009201	F28C1.3	42.8347	29.9466	75.1973	0.207973	164
WBGene00017898	F28C10.3	20.2769	13.3878	41.7725	0.541326	139.667
WBGene00009207	F28C6.8	24.788	18.1245	39.1997	0.41701	98
WBGene00017900	F28E10.1	38.0766	30.3381	51.1145	0.109939	711
WBGene00044188	F28F8.9	22.8629	18.1114	30.9942	0.260499	118.333
WBGene00009233	F28H6.4	28.583	19.1099	56.6802	0.599512	324.667
WBGene00017916	F29A7.6	19.2799	13.8678	31.62	0.399398	207.333
WBGene00009266	F30A10.9	187.356	87.6798	-1369.3	0.70096	1021
WBGene00009274	F30F8.5	46.3219	30.4946	96.3065	0.359523	271.667
WBGene00017939	F31A3.5	21.9868	18.1897	27.7873	0.24228	203.667
WBGene00009285	F31C3.3	50.7908	33.8932	101.289	0.456793	473.333
WBGene00009290	F31D4.2	68.7399	43.6693	161.4	0.378617	461
WBGene00009293	F31D4.8	19.969	15.3728	28.486	0.347326	230
WBGene00017952	F31E3.6	176.427	78.2107	-689.725	0.545226	144
WBGene00017954	F31E8.4	48.8972	38.91	65.7814	0.302243	248
WBGene00009307	F32A11.1	36.9139	27.664	55.4569	0.320222	339.333
WBGene00023021	F32A5.9	51.5799	32.3304	127.484	0.677693	75
WBGene00017976	F32B5.2	45.0982	29.1559	99.5088	0.272195	172
WBGene00017983	F32D1.3	51.6019	37.2039	84.1792	0.148303	118.333
WBGene00009330	F32D8.5	18.966	15.3197	24.8903	0.227141	153
WBGene00017992	F32E10.5	27.6057	19.6498	46.3873	0.377289	295.333
WBGene00009352	F33A8.4	27.4954	21.1073	39.4283	0.331503	151.667
WBGene00009355	F33A8.7	79.0427	35.499	-348.796	0.156086	222.333
WBGene00018007	F33D11.10	44.1409	37.2956	54.0637	0.13204	394.667
WBGene00017996	F33D4.4	50.0732	30.0134	150.988	0.490142	79.6667
WBGene00018011	F33E11.3	28.456	21.9547	40.4276	0.324981	91
WBGene00009361	F33E2.5	41.4669	29.2885	70.9813	0.459888	2664.67
WBGene00018018	F33G12.6	24.2966	18.5547	35.1849	0.374559	428.667
WBGene00009365	F33H1.4	31.3185	24.1106	44.6738	0.262358	807.667
WBGene00009366	F33H2.2	20.4176	16.3408	27.2047	0.278894	207.667
WBGene00009367	F33H2.3	57.489	38.257	115.603	0.539469	3752
WBGene00009369	F33H2.6	36.0553	25.5598	61.1753	0.397144	104.333
WBGene00009373	F34D10.3	31.9927	23.0905	52.0662	0.452188	507.333
WBGene00009380	F34H10.3	30.9227	20.0295	67.7917	0.54607	122
WBGene00001335	F35A5.8	34.2871	28.9692	41.9963	0.114587	514.667
WBGene00018045	F35D11.4	14.317	10.7076	21.5968	0.429615	124.667
WBGene00018041	F35D2.3	32.713	28.5534	38.2911	0.0931348	1830
WBGene00009445	F35G12.12	32.7253	21.1881	71.8463	0.569193	139
WBGene00009443	F35G12.7	33.8972	25.4622	50.6892	0.314516	374.667
WBGene00018071	F35H10.6	24.1025	15.4417	54.8871	0.655452	53.6667
WBGene00009452	F36A2.2	49.9702	32.97	103.164	0.384221	104.333
WBGene00009454	F36A2.7	142.443	85.8748	417.397	0.506581	2901.67
WBGene00009456	F36A2.9	36.8619	29.3131	49.647	0.296098	142.667
WBGene00009469	F36D3.1	34.2699	24.1391	59.0539	0.37034	162.333
WBGene00018090	F36D4.5	37.2188	27.6427	56.9464	0.385769	929.667
WBGene00009483	F36G3.2	54.2978	38.8296	90.2499	0.236723	102.333
WBGene00206519	F36H5.13	46.0922	31.154	88.5523	0.331306	114.333
WBGene00018103	F36H5.4	56.2816	41.6215	86.8842	0.299561	180.333
WBGene00018115	F36H9.7	31.8092	23.8215	47.8556	0.293898	123
WBGene00018131	F37A4.1	47.4995	38.4633	62.0849	0.181944	339.333
WBGene00018132	F37A4.2	31.6058	20.3681	70.5064	0.435644	218.667
WBGene00018140	F37B4.10	26.0594	20.0232	37.3055	0.303373	472.333
WBGene00018159	F37F2.2	25.9105	21.3915	32.8502	0.222965	414
WBGene00009521	F38A1.8	61.3536	44.6011	98.2615	0.27965	475.667
WBGene00018161	F38A5.2	58.0306	38.2599	120.083	0.65701	535.667
WBGene00009531	F38B2.4	107.773	67.3202	270.047	0.447235	242.667
WBGene00018175	F38B6.6	41.482	33.2565	55.1137	0.226111	485.667
WBGene00009534	F38B7.3	26.3788	21.4985	34.1256	0.252148	548.667
WBGene00009544	F38E11.9	32.7358	24.2345	50.4242	0.150067	104.667
WBGene00009554	F39B2.3	50.7758	38.8326	73.3286	0.256404	654.667
WBGene00009556	F39B2.5	20.2902	13.5009	40.815	0.642118	118
WBGene00009558	F39B2.8	51.2859	34.9864	96.0198	0.274558	363
WBGene00018193	F39C12.1	52.0598	29.6683	212.255	0.482508	970.667
WBGene00023036	F39E9.10	57.9811	39.4284	109.51	0.256869	321
WBGene00271716	F39E9.28	32.1748	23.5509	50.7638	0.307578	177.667
WBGene00018199	F39E9.7	23.9377	16.5751	43.0681	0.424186	372
WBGene00018208	F39G3.3	34.8903	26.2589	51.9742	0.360655	518.667
WBGene00009565	F39H11.1	23.4173	19.2433	29.9036	0.214738	356
WBGene00018212	F39H12.1	23.2977	18.4146	31.7052	0.272744	142
WBGene00018214	F39H12.3	58.6843	34.8083	186.85	0.246688	212.333
WBGene00009563	F39H2.3	30.6148	24.6077	40.5019	0.295857	109
WBGene00018226	F40B5.2	26.1324	21.5047	33.2979	0.156919	313.667
WBGene00009574	F40E10.6	56.1247	38.4654	103.761	0.290976	627.667
WBGene00009588	F40F11.3	25.189	18.3643	40.0859	0.351901	238
WBGene00018238	F40F4.7	43.7601	31.4969	71.6611	0.343809	647
WBGene00009575	F40F8.1	24.4848	21.3179	28.7568	0.018932	272
WBGene00044916	F40F8.11	41.1651	28.849	71.8305	0.391824	655.333
WBGene00018302	F41G3.6	20.2466	14.2121	35.1871	0.454742	57.6667
WBGene00018316	F41H10.3	22.4033	16.9677	32.9628	0.299108	391
WBGene00018317	F41H10.4	43.1657	35.111	56.0163	0.182982	437
WBGene00018341	F42A10.5	30.478	23.3023	44.0396	0.317051	143
WBGene00018328	F42A6.6	30.3822	21.0152	54.8143	0.502633	133.333
WBGene00018349	F42C5.9	63.5741	36.227	259.358	0.342676	352.333
WBGene00009635	F42F12.3	62.9465	47.0662	94.9996	0.333304	88.6667
WBGene00018361	F42G8.10	80.2076	52.2387	172.64	0.256637	1093.33
WBGene00018370	F42H10.6	29.0434	21.5206	44.6521	0.325502	73.6667
WBGene00018373	F43B10.1	30.0817	25.1775	37.3587	0.104315	124.333
WBGene00009657	F43G6.4	39.4599	28.0358	66.5967	0.458473	1380.33
WBGene00009660	F43G6.8	38.2414	26.7758	66.8799	0.0800346	216
WBGene00009676	F44A6.4	23.4844	16.5525	40.4055	0.403543	153.667
WBGene00018408	F44B9.5	39.3511	27.3605	70.05	0.369931	187.667
WBGene00018409	F44B9.8	17.1513	12.2564	28.5553	0.44982	227.333
WBGene00018417	F44E2.3	31.7361	22.0933	56.3154	0.483975	534
WBGene00018419	F44E2.6	32.8487	25.7658	45.3018	0.290959	162.667
WBGene00018420	F44E2.7	26.6718	20.5038	38.1473	0.348862	556
WBGene00018421	F44E2.8	25.7936	21.3786	32.5067	0.196353	268.667
WBGene00018422	F44E2.9	18.8231	14.2399	27.7568	0.330944	110.667
WBGene00009688	F44E5.1	47.7788	33.4888	83.342	0.276881	424.667
WBGene00018426	F44E7.4	18.8392	15.6573	23.6443	0.21846	198.333
WBGene00018431	F44E7.9	35.5747	33.4193	38.0274	0.056613	469.333
WBGene00009696	F44F1.4	25.7705	17.5879	48.1909	0.506202	78.6667
WBGene00009697	F44F1.5	10.0297	7.67254	14.4774	0.325112	103.333
WBGene00009698	F44F1.6	19.7962	14.4835	31.2641	0.397372	504.333
WBGene00009712	F44G4.2	67.4962	46.8103	120.942	0.290213	434.667
WBGene00009713	F44G4.3	19.1633	14.5046	28.2307	0.322656	63
WBGene00018462	F45E1.1	36.651	30.6708	45.5282	0.190288	457.667
WBGene00018482	F45F2.10	26.2561	18.2905	46.5126	0.435353	183.667
WBGene00009739	F45H10.2	51.669	44.198	62.1793	0.145517	297.667
WBGene00009740	F45H10.3	75.3619	51.505	140.39	0.382534	1059
WBGene00189958	F45H11.8	25.2592	16.4866	53.984	0.580049	74.3333
WBGene00009771	F46B6.6	30.6147	20.7468	58.3848	0.368761	81.3333
WBGene00009784	F46C5.9	42.6902	32.7949	61.1375	0.316586	243.667
WBGene00018485	F46C8.3	43.7436	36.7254	54.0779	0.037603	329.667
WBGene00018508	F46F11.1	52.0759	32.0333	139.121	0.45483	626
WBGene00018517	F46G11.4	45.2652	32.7543	73.2403	0.206768	189.667
WBGene00018518	F46H5.2	29.2945	24.7176	35.9514	0.145923	205
WBGene00018519	F46H5.3	211.56	113.113	1631.77	0.746023	6054.67
WBGene00018520	F46H5.4	51.7278	37.1461	85.1556	0.298006	879.333
WBGene00018532	F47B7.1	54.6779	40.1489	85.6857	0.31507	340.667
WBGene00018533	F47B7.2	66.1013	47.5135	108.578	0.392608	714.333
WBGene00009804	F47B8.3	56.584	40.1371	95.8673	0.114755	124.667
WBGene00018564	F47D12.9	41.1284	24.9399	117.207	0.521381	95
WBGene00009825	F47G4.4	28.5033	24.4372	34.1925	0.190655	447.667
WBGene00018593	F48B9.8	26.9213	20.7981	38.1545	0.239516	195
WBGene00018606	F48E3.6	42.7499	34.6189	55.873	0.241427	3747
WBGene00018608	F48E3.9	62.4105	39.4734	148.978	0.674499	1005
WBGene00018609	F48E8.2	39.6869	27.2594	72.9401	0.228053	138.667
WBGene00018611	F48E8.4	53.2417	33.2822	133.006	0.449546	161
WBGene00044410	F48E8.8	59.0881	37.7019	136.539	0.373527	157.667
WBGene00009880	F49C12.11	70.1212	54.9916	96.7358	0.190273	635.667
WBGene00009881	F49C12.12	66.0209	60.1074	73.2251	0.0425458	948
WBGene00009878	F49C12.9	39.8315	30.0145	59.1919	0.306188	521.333
WBGene00045433	F49D11.10	26.9178	19.4393	43.7479	0.442963	75.6667
WBGene00009889	F49E11.2	50.7159	28.2204	249.996	0.434236	67
WBGene00009915	F52A8.1	74.4624	54.2637	118.614	0.365157	2568
WBGene00044304	F52B10.3	38.345	27.9734	60.9392	0.324758	325.333
WBGene00009923	F52B5.7	20.3909	16.145	27.667	0.257268	342
WBGene00018674	F52C9.3	23.581	17.4367	36.4116	0.380447	73.3333
WBGene00009930	F52D10.2	35.1597	28.1583	46.7949	0.193302	300.667
WBGene00219959	F52D2.14	47.2667	25.2445	370.313	0.370329	59.6667
WBGene00018689	F52D2.7	46.3721	34.4219	71.0325	0.364888	97
WBGene00018710	F52G3.1	64.2597	41.5264	141.992	0.4715	5003
WBGene00018714	F52H2.1	34.6864	26.2414	51.1463	0.299677	178.667
WBGene00009951	F53A2.3	34.6244	26.4701	50.0395	0.301021	507.667
WBGene00009953	F53A2.9	59.6299	40.6365	111.959	0.195651	210.333
WBGene00018735	F53B1.2	19.5134	15.662	25.8768	0.221928	114
WBGene00018743	F53B3.5	56.3412	48.988	66.2916	0.126719	1683.33
WBGene00009973	F53C11.3	41.7069	34.6067	52.4727	0.208214	414.667
WBGene00009974	F53C11.4	68.5572	44.9161	144.739	0.475995	588
WBGene00009975	F53C11.5	32.2069	27.0851	39.7176	0.177038	594
WBGene00018747	F53C3.3	53.4868	39.8483	81.3193	0.225285	98
WBGene00018748	F53C3.4	41.0799	27.8345	78.3763	0.36638	99
WBGene00018758	F53E10.1	42.1611	27.6628	88.5938	0.497307	77.3333
WBGene00018762	F53E10.6	23.6551	19.3936	30.3168	0.227022	246.333
WBGene00302980	F53E2.2	77.7396	68.7419	89.4475	0.0662209	3377
WBGene00009980	F53F1.2	30.4309	25.0399	38.78	0.216013	160
WBGene00018764	F53F10.2	55.0621	42.2042	79.1871	0.205747	467
WBGene00009992	F53F4.10	53.5369	43.3546	69.97	0.211408	1056.33
WBGene00009993	F53F4.11	70.7372	44.7192	169.151	0.545434	580
WBGene00009994	F53F4.12	21.9525	16.9777	31.051	0.369945	166.333
WBGene00010002	F53F8.5	36.4277	28.3726	50.8698	0.0828254	213
WBGene00018766	F53G2.1	52.4893	38.6172	81.9148	0.205903	116.333
WBGene00018777	F53H1.3	26.4283	20.91	35.9035	0.299273	62.6667
WBGene00018778	F53H1.4	68.7004	52.7227	98.5731	0.291696	3203
WBGene00010006	F53H2.3	37.2019	23.0937	95.614	0.330491	240
WBGene00018784	F54A3.5	67.0099	40.0035	206.248	0.425532	277.333
WBGene00018785	F54A3.6	39.258	25.6581	83.5359	0.478612	247.667
WBGene00010033	F54B11.10	57.3674	31.7218	299.491	0.376232	108
WBGene00010028	F54B11.5	31.8865	27.3218	38.2826	0.132949	320
WBGene00010013	F54B3.1	55.7551	35.6856	127.41	0.410255	745.667
WBGene00018795	F54C4.4	30.2263	20.0636	61.252	0.449105	331.667
WBGene00010039	F54C8.6	44.7882	36.4431	58.0903	0.183875	247
WBGene00010040	F54C8.7	31.0015	24.6891	41.6503	0.28491	156.333
WBGene00010045	F54C9.11	26.4682	21.9843	33.2499	0.00488665	202.333
WBGene00010044	F54C9.9	27.1435	19.7014	43.6215	0.354978	777.667
WBGene00010051	F54D5.5	25.2727	18.5196	39.7777	0.449731	1809
WBGene00010053	F54D5.9	49.6259	33.8266	93.1184	0.385154	157
WBGene00018802	F54D8.6	30.2788	23.2857	43.2752	0.335027	593
WBGene00010061	F54E12.2	28.5918	22.2014	40.1481	0.245161	126.333
WBGene00018831	F54E7.9	45.8973	29.4666	103.747	0.634744	205.667
WBGene00018836	F54F2.9	24.6786	19.1854	34.5797	0.347697	104.333
WBGene00305131	F54H12.10	49.496	35.2847	82.8749	0.290516	127
WBGene00010075	F55A11.1	76.4133	59.7006	106.121	0.174626	847.667
WBGene00018864	F55A12.5	39.6276	27.5387	70.6343	0.416965	114.333
WBGene00018898	F55F10.1	40.2447	26.815	80.623	0.428598	607.333
WBGene00018890	F55F8.2	50.5615	35.11	90.303	0.36916	282
WBGene00018891	F55F8.3	31.2341	27.6065	35.9594	0.153459	206.667
WBGene00010131	F55H2.5	29.4086	23.6861	38.777	0.136014	167.667
WBGene00018925	F56A11.5	43.501	34.4483	59.0076	0.22969	159
WBGene00010139	F56A8.3	48.521	37.2083	69.7179	0.247001	2937.33
WBGene00185001	F56A8.9	123.108	60.2089	-2755.38	0.656774	97.3333
WBGene00018955	F56C11.3	18.1685	12.2106	35.4804	0.546453	71.6667
WBGene00018953	F56C9.10	44.1268	37.3925	53.8195	0.121538	672
WBGene00018959	F56D1.1	19.6839	13.7995	34.3175	0.495895	69.6667
WBGene00018964	F56D2.2	23.1258	16.1381	40.7855	0.516104	103
WBGene00014772	F56D5.4	73.3208	44.3236	212.042	0.189387	468.333
WBGene00010161	F56G4.6	43.7032	32.5232	66.5959	0.273116	114
WBGene00010174	F56H9.2	140.39	66.93	-1438.92	0.566903	694.333
WBGene00010177	F57A8.1	74.2585	52.8538	124.8	0.313465	1269.67
WBGene00019005	F57B10.8	43.8445	33.2479	64.3558	0.188578	168.667
WBGene00010192	F57B7.2	31.0356	23.8149	44.5404	0.258571	210.333
WBGene00018996	F57B9.1	40.5363	31.3959	57.1848	0.205329	158.667
WBGene00010197	F57C2.5	37.9369	32.1979	46.1653	0.173996	253
WBGene00019011	F57C9.4	28.1724	21.8942	39.4987	0.286662	268.333
WBGene00010221	F57G12.1	50.0568	39.7771	67.5011	0.213314	2331.33
WBGene00010229	F58A4.6	17.4091	13.0076	26.3132	0.38231	108.333
WBGene00010231	F58B3.4	52.183	39.576	76.5764	0.383454	316.667
WBGene00010232	F58B3.6	29.9458	24.5616	38.3534	0.22486	632
WBGene00010242	F58D5.2	101.431	59.4101	346.54	0.114524	68
WBGene00010244	F58D5.5	97.4993	58.7478	286.446	0.491725	717.333
WBGene00019061	F58F12.1	124.918	82.6253	255.907	0.267526	2160.67
WBGene00019055	F58F9.1	58.3616	41.7137	97.1239	0.312444	114.333
WBGene00010269	F58G1.7	10.9835	7.33727	21.8338	0.562398	224.333
WBGene00010286	F58H1.3	26.0301	17.8207	48.2633	0.446207	100.333
WBGene00010288	F58H1.5	14.7893	11.3717	21.1438	0.324591	349.667
WBGene00010290	F58H1.7	166.873	71.9127	-520.68	0.230313	348.333
WBGene00010305	F59A2.5	25.1648	16.7996	50.1229	0.426158	352.333
WBGene00019087	F59A6.5	42.8728	31.4295	67.4201	0.310751	1358.67
WBGene00010318	F59B10.2	50.9682	34.8294	94.9774	0.284139	329.667
WBGene00010310	F59B2.8	28.6321	23.5502	36.5109	0.212353	290
WBGene00010311	F59B2.9	33.31	25.0685	49.6249	0.193422	217
WBGene00019102	F59C12.3	67.731	49.9966	104.962	0.262858	1391.33
WBGene00045272	F59C12.4	19.8285	11.9495	58.2077	0.596949	526.667
WBGene00019118	F59E12.1	35.2769	25.475	57.3389	0.459136	363.667
WBGene00019124	F59E12.9	44.0886	31.1518	75.4016	0.336168	930.667
WBGene00010338	F59F4.3	27.7035	20.6582	42.0412	0.364549	161.667
WBGene00010345	F59F5.7	116.022	68.9578	365.434	0.192857	93.6667
WBGene00019128	F59G1.4	37.8131	22.8212	110.22	0.810024	111.333
WBGene00013232	faah-4	37.5867	26.3483	65.5428	0.264094	72.6667
WBGene00019620	fah-1	73.7611	51.0101	133.145	0.320493	294.667
WBGene00022798	fahd-1	72.0981	40.9232	302.665	0.24345	97
WBGene00015310	fan-1	40.3715	29.9898	61.7466	0.172966	208.333
WBGene00017349	farl-11	35.1956	27.6965	48.2635	0.337593	401
WBGene00001498	fars-3	36.284	27.3208	53.9997	0.209132	275.333
WBGene00001395	fat-3	92.5722	65.8406	155.847	0.266356	107
WBGene00001396	fat-4	177.231	107.987	493.997	0.539312	669.333
WBGene00001400	fax-1	36.9992	25.2721	69.0321	0.297361	589.667
WBGene00001404	fbp-1	44.3038	34.0135	63.521	0.226922	104.667
WBGene00008612	fbxa-103	18.02	13.4247	27.3984	0.356187	92.6667
WBGene00013453	fbxa-83	22.6978	18.4174	29.5702	0.155118	173.333
WBGene00020362	fbxb-10	49.9249	38.0445	72.5945	0.184861	117
WBGene00013403	fbxb-100	46.3806	35.4543	67.0416	0.266906	571.333
WBGene00013404	fbxb-101	58.3613	40.2711	105.959	0.27878	361
WBGene00008847	fbxb-102	33.594	27.251	43.7855	0.169305	72.6667
WBGene00017254	fbxb-111	47.5285	30.3553	109.447	0.6719	77.3333
WBGene00022557	fbxb-15	20.6719	15.167	32.4495	0.385329	164.333
WBGene00019039	fbxb-18	21.4096	16.8652	29.3062	0.2951	346.667
WBGene00019035	fbxb-26	35.5554	27.5345	50.1701	0.238855	208.667
WBGene00017208	fbxb-35	21.6999	15.8751	34.2763	0.418724	792
WBGene00020537	fbxb-37	26.5936	19.7748	40.59	0.368741	863
WBGene00019703	fbxb-41	42.7871	28.3488	87.1968	0.476274	223
WBGene00019416	fbxb-44	32.1619	27.5928	38.5445	0.058406	262.667
WBGene00019705	fbxb-45	33.9734	25.1985	52.1247	0.341695	934.667
WBGene00019418	fbxb-54	48.1616	33.7123	84.288	0.275774	65.6667
WBGene00010105	fbxb-62	41.7749	28.5561	77.7797	0.393205	94
WBGene00044197	fbxb-63	37.2691	25.1473	71.953	0.435771	91.3333
WBGene00008066	fbxb-65	28.7286	20.1946	49.7541	0.416111	270
WBGene00044066	fbxb-66	51.1792	39.2867	73.3974	0.279673	1906
WBGene00008613	fbxb-69	26.2019	17.8165	49.4982	0.496764	146.333
WBGene00014149	fbxb-70	24.2866	18.0498	37.1091	0.420213	401.667
WBGene00018236	fbxb-71	27.5334	16.9982	72.4165	0.503513	85
WBGene00021204	fbxb-77	30.2574	22.1843	47.5677	0.348917	351.333
WBGene00017116	fbxb-78	16.8866	13.3668	22.9228	0.314819	244
WBGene00009861	fbxb-8	55.7672	38.4138	101.718	0.48736	608
WBGene00011267	fbxb-85	35.3521	26.2819	53.9819	0.210932	124
WBGene00016359	fbxb-88	29.5593	24.8984	36.3671	0.219019	1190.33
WBGene00044692	fbxb-91	43.7771	27.4713	107.708	0.682186	93.3333
WBGene00013410	fbxb-94	20.8811	13.1685	50.3991	0.610147	61.6667
WBGene00018352	fbxc-20	36.0128	28.4276	49.1192	0.293794	698.333
WBGene00019927	fbxc-24	29.9361	16.2742	186.493	0.448817	71.3333
WBGene00019591	fbxc-25	81.8533	59.4528	131.339	0.393397	335.667
WBGene00019918	fbxc-36	48.5	32.3323	97.009	0.407011	301.333
WBGene00016295	fbxc-40	27.4966	25.6093	29.6842	0.0577877	309
WBGene00021576	fbxc-51	34.7411	25.3235	55.3108	0.359694	2232.33
WBGene00016710	fbxc-52	41.6049	27.3949	86.4445	0.378654	175.667
WBGene00017744	fbxc-54	35.4931	25.4667	58.541	0.425592	121
WBGene00016305	fbxc-57	29.7722	21.2857	49.5122	0.360622	71.6667
WBGene00012767	fcd-2	40.5985	30.6589	60.0747	0.0794899	192
WBGene00001405	fce-1	43.3429	35.7123	55.1204	0.0786101	287.667
WBGene00001406	fce-2	36.8373	29.2876	49.6311	0.232911	172.667
WBGene00018974	fcho-1	35.8815	23.0805	80.5638	0.549625	195.333
WBGene00009479	fcp-1	44.9054	34.3227	64.9231	0.305067	299
WBGene00011058	fdps-1	21.2894	16.0722	31.5219	0.391705	165.333
WBGene00001411	fem-1	21.5373	16.2229	32.0299	0.361566	135.333
WBGene00019207	fgt-1	75.3781	58.1857	106.992	0.230343	820.667
WBGene00001423	fib-1	55.7052	43.4097	77.7181	0.321021	1317
WBGene00014004	fic-1	50.4656	40.3308	67.4035	0.233046	417.333
WBGene00017981	figl-1	22.9991	19.0275	29.066	0.139215	140.667
WBGene00007912	figo-1	38.5177	24.2791	93.1412	0.760497	91
WBGene00017988	fipp-1	33.1237	26.1246	45.2454	0.2979	751
WBGene00001425	fis-2	21.9518	18.2224	27.6004	0.113093	370.667
WBGene00044094	fitm-2	25.5559	21.3058	31.924	0.196566	262.667
WBGene00001426	fkb-1	60.8524	50.5302	76.4745	0.157452	1752.67
WBGene00001427	fkb-2	103.462	83.2426	136.654	0.131546	5404.67
WBGene00001430	fkb-5	31.5292	23.5852	47.5425	0.122384	342
WBGene00001431	fkb-6	59.8829	46.7848	83.1664	0.227347	1666
WBGene00001432	fkb-7	92.9571	60.4641	200.941	0.621573	614
WBGene00001433	fkb-8	38.3719	25.1671	80.7293	0.416054	88.3333
WBGene00001434	fkh-2	17.0118	12.2274	27.9474	0.451627	254.667
WBGene00001439	fkh-7	35.705	24.4933	65.8452	0.384332	145.333
WBGene00001440	fkh-8	57.6014	33.5784	202.415	0.408603	469.667
WBGene00018998	flap-1	31.4015	24.486	43.7608	0.266836	285
WBGene00017699	flcn-1	62.039	54.2955	72.3587	0.135458	2270
WBGene00013407	fld-1	60.0783	40.8414	113.572	0.290556	297.333
WBGene00012435	flh-1	20.6466	15.7654	29.9058	0.372878	2070
WBGene00016138	flh-2	50.1788	37.5469	75.6192	0.223695	1330
WBGene00012436	flh-3	18.0058	13.1251	28.6655	0.419107	1001.67
WBGene00022048	fln-1	38.7842	26.3806	73.2019	0.397433	125.333
WBGene00016006	fln-2	53.0144	37.9269	88.0349	0.0729991	192.333
WBGene00001458	flp-15	35.1477	23.772	67.4021	0.331841	74.3333
WBGene00016114	flp-27	111.513	49.9175	-476.667	0.496368	278
WBGene00008973	flwr-1	68.7836	54.9525	91.9188	0.271713	1700
WBGene00001475	fmi-1	47.0028	37.2517	63.6688	0.186022	6397.33
WBGene00021362	fmil-1	36.1518	26.9282	54.9861	0.348827	253.333
WBGene00020935	fnci-1	68.7322	49.542	112.189	0.329772	509.333
WBGene00020208	fnip-2	28.1021	20.6025	44.1866	0.375231	289
WBGene00019823	fnta-1	28.2667	18.7548	57.3556	0.568036	227.667
WBGene00006465	fntb-1	36.0438	27.7614	51.3695	0.27958	458.667
WBGene00001484	fox-1	44.0691	36.2037	56.3006	0.185008	724.333
WBGene00014177	frg-1	28.4347	23.353	36.3432	0.256252	560.333
WBGene00021698	frl-1	24.8391	20.7794	30.8703	0.201809	433.333
WBGene00001488	frm-1	50.1202	37.3626	76.1073	0.261991	837.667
WBGene00001496	frm-10	27.6884	23.2791	34.1583	0.136211	139.333
WBGene00001489	frm-2	29.4003	22.6217	41.9794	0.37227	1058
WBGene00001491	frm-4	55.7051	39.6372	93.6811	0.299559	612.667
WBGene00001493	frm-7	23.8719	18.6827	33.0521	0.351043	175.667
WBGene00001499	fsn-1	54.0382	38.7426	89.2901	0.31148	341
WBGene00001502	ftt-2	72.7625	57.7535	98.3119	0.135202	7161.67
WBGene00007534	fubl-1	54.2349	39.8024	85.088	0.423897	3210.67
WBGene00022738	fubl-2	30.7307	22.7657	47.2686	0.323174	118.333
WBGene00016489	fubl-3	33.2278	25.4025	48.0207	0.360061	714
WBGene00001503	fum-1	45.9281	38.8369	56.1872	0.160954	159.667
WBGene00016173	fust-1	67.0908	54.3491	87.6365	0.240876	3974.67
WBGene00006402	fut-3	22.8348	18.0205	31.1591	0.276879	141.333
WBGene00001508	fut-8	24.5242	17.6717	40.0567	0.379151	141.667
WBGene00001509	fzo-1	31.9931	26.7719	39.7442	0.192213	198.667
WBGene00001510	fzr-1	31.2206	24.446	43.1897	0.279087	792.333
WBGene00001511	fzy-1	65.7614	54.9497	81.8697	0.18649	976.667
WBGene00001513	gad-1	24.6501	18.2302	38.0497	0.316268	215.667
WBGene00009823	gadr-6	21.6338	16.9723	29.8255	0.331571	336.333
WBGene00018516	gakh-1	41.5483	29.7336	68.9429	0.374382	251.667
WBGene00001516	gap-2	27.5465	22.0947	36.5701	0.251882	429.667
WBGene00001744	gars-1	38.6281	33.3465	45.8976	0.179677	104.667
WBGene00001520	gas-1	75.6283	44.9977	236.867	0.458526	477.667
WBGene00008144	gasr-8	47.2691	30.1804	108.97	0.336697	395.333
WBGene00007703	gbf-1	71.0343	44.6253	174.016	0.320531	405.667
WBGene00002220	gcc-1	28.4729	20.8647	44.8143	0.447341	334.667
WBGene00011503	gcc-2	33.375	25.4219	48.5697	0.332732	209.333
WBGene00001526	gck-1	28.5189	20.3065	47.8844	0.376519	199.333
WBGene00022603	gck-2	67.0551	49.7543	102.802	0.129538	653
WBGene00013355	gck-3	67.5084	47.0626	119.365	0.185329	171.667
WBGene00007287	gck-4	32.3006	23.9091	49.768	0.318508	309.333
WBGene00013382	gcl-1	25.3302	18.6606	39.419	0.390398	123
WBGene00021697	gcn-1	47.5612	32.8173	86.3602	0.249957	170.667
WBGene00013591	gcn-2	39.0383	26.9649	70.689	0.522617	147.667
WBGene00022694	gcna-1	41.1869	29.698	67.1735	0.350538	647.667
WBGene00009918	gcsh-2	42.098	34.3369	54.3923	0.141387	370
WBGene00017765	gcst-1	26.7779	21.0362	36.8304	0.149996	101
WBGene00020131	gcy-28	51.1282	36.4538	85.5768	0.296801	183
WBGene00014095	gdh-1	74.6374	45.4915	207.724	0.295628	208.333
WBGene00001558	gdi-1	74.6202	54.9799	116.091	0.377069	1472
WBGene00001570	gei-13	68.804	40.942	215.365	0.454046	76
WBGene00001574	gei-17	33.5255	27.5038	42.923	0.129573	403
WBGene00001561	gei-4	63.7981	50.5416	86.4811	0.203527	3374.33
WBGene00001563	gei-6	38.2704	30.1245	52.4547	0.251309	1103.33
WBGene00001565	gei-8	27.7499	21.4156	39.4052	0.331357	648
WBGene00001577	gem-4	32.6845	26.6542	42.2413	0.155818	594
WBGene00020442	gen-1	17.9989	14.1528	24.7155	0.25754	114.333
WBGene00019813	ger-1	32.7542	23.7712	52.6505	0.174383	136.667
WBGene00001579	gex-2	40.1798	31.4343	55.6674	0.339061	865.333
WBGene00001580	gex-3	28.268	24.626	33.1742	0.0779874	446
WBGene00008546	gfat-1	43.9643	29.7039	84.5606	0.386564	101
WBGene00001582	gfi-2	48.6815	34.949	80.1909	0.260149	430
WBGene00001585	gfl-1	23.8301	18.6349	33.0419	0.324025	607.333
WBGene00009246	gfm-1	38.8739	30.2683	54.3168	0.207466	142.333
WBGene00015099	ggtb-1	25.0066	21.1951	30.4894	0.203342	291
WBGene00001589	gip-1	36.7226	23.9978	78.1743	0.477794	175.667
WBGene00008805	git-1	41.3447	30.517	64.0811	0.324395	303.333
WBGene00011237	gkow-1	23.9308	19.1583	31.8698	0.279867	361.667
WBGene00001596	gld-2	67.096	31.4324	-498.44	0.478442	97.3333
WBGene00014115	gld-4	55.927	41.3325	86.4536	0.188637	251.667
WBGene00018878	glit-1	36.8513	31.5579	44.2783	0.155868	357.667
WBGene00001602	gln-1	27.1873	20.9987	38.5479	0.154779	78
WBGene00006936	glp-4	36.6336	25.4197	65.5515	0.337716	132
WBGene00001617	glr-6	41.7617	28.5332	77.8584	0.223674	80.3333
WBGene00021331	glrx-10	55.4333	43.9465	75.0498	0.0890688	112.667
WBGene00022663	glrx-21	47.2794	28.4586	139.606	0.477994	69.3333
WBGene00044608	glrx-22	29.2948	23.8451	37.9738	0.271994	80.3333
WBGene00001635	gly-10	64.9884	45.9722	110.835	0.188654	272
WBGene00001636	gly-11	28.1203	20.3171	45.6548	0.4468	62.6667
WBGene00001637	gly-12	30.6447	22.7258	47.034	0.335422	215
WBGene00001645	gly-20	18.686	14.252	27.1251	0.325287	89.6667
WBGene00001628	gly-3	42.357	34.7407	54.2503	0.128911	158.333
WBGene00001630	gly-5	50.1884	32.7632	107.206	0.439577	112.333
WBGene00001632	gly-7	38.0335	36.1127	40.17	0.0359356	255.667
WBGene00015285	gmeb-1	29.4874	23.6142	39.2493	0.310383	254.333
WBGene00013552	gmn-1	32.1996	22.91	54.1606	0.41867	214.667
WBGene00001646	gna-1	32.3431	25.7956	43.3449	0.133046	168.333
WBGene00001648	goa-1	67.5949	45.6756	129.963	0.446241	3046.33
WBGene00001649	gob-1	61.9646	48.2726	86.4994	0.0135499	241.667
WBGene00018017	golg-2	30.3028	21.6299	50.5863	0.355505	208.667
WBGene00002148	gon-14	32.6088	24.2167	49.9018	0.321754	399.667
WBGene00001653	gon-4	27.9792	21.0895	41.5545	0.399648	511.333
WBGene00001660	gop-1	23.5727	16.0811	44.1326	0.386344	87.3333
WBGene00001661	gop-2	26.7587	16.701	67.2702	0.714453	163
WBGene00001662	gop-3	30.2961	20.3645	59.137	0.548913	165.333
WBGene00017273	gos-28	30.6266	24.6736	40.3655	0.183543	106.667
WBGene00020146	got-1.2	30.0215	25.7655	35.9618	0.081149	113.667
WBGene00001669	gpa-7	43.2714	36.8529	52.3972	0.0699401	219
WBGene00001671	gpa-9	69.6864	52.0644	105.341	0.212398	488.333
WBGene00018006	gpaa-1	35.2709	25.0634	59.5058	0.238778	105.333
WBGene00012390	gpap-1	22.9508	16.6197	37.0734	0.432188	100.333
WBGene00001679	gpb-1	63.2045	46.9951	96.4834	0.187525	1971.33
WBGene00001680	gpb-2	47.2562	34.9962	72.7381	0.1895	568.333
WBGene00001682	gpc-2	69.0451	49.5084	114.051	0.312723	4244
WBGene00011109	gpch-1	32.941	25.3682	46.9591	0.321876	268.333
WBGene00011511	gpcp-2	49.6067	32.537	104.353	0.539637	246.333
WBGene00001685	gpd-3	81.4479	50.5809	208.975	0.477152	100.333
WBGene00001686	gpd-4	29.6901	22.0016	45.6386	0.115692	105.333
WBGene00010778	gpdh-2	30.7866	25.5133	38.8076	0.10057	186
WBGene00012031	gpdh-3	35.3822	28.178	47.5355	0.219671	414.333
WBGene00001688	gpr-1	28.5319	21.6594	41.7927	0.34848	275.333
WBGene00001689	gpr-2	30.1299	21.6247	49.6627	0.391016	271.333
WBGene00009165	gpx-1	67.9085	49.0729	110.211	0.2948	261.667
WBGene00011045	gpx-2	47.2841	32.0082	90.453	0.595755	103.667
WBGene00013082	grdn-1	45.5698	32.9022	74.0981	0.317156	1077.33
WBGene00001708	grk-1	34.4384	25.5747	52.7049	0.324217	804
WBGene00001745	gsa-1	62.4217	43.2785	111.932	0.271849	370
WBGene00001746	gsk-3	45.2637	39.8173	52.4363	0.0950475	629
WBGene00001747	gsp-1	53.1319	43.1669	69.0786	0.219434	961
WBGene00001748	gsp-2	168.526	98.7406	574.695	0.61779	1782.67
WBGene00008117	gsr-1	46.7591	34.7792	71.3289	0.196387	160.667
WBGene00010941	gss-1	21.363	18.2732	25.7103	0.0792367	133.333
WBGene00001749	gst-1	48.4847	34.459	81.7652	0.34156	213.333
WBGene00001755	gst-7	236.885	96.988	-535.441	0.298896	172.333
WBGene00010677	gtbp-1	40.3933	28.5329	69.1282	0.468018	1328.67
WBGene00013998	gtf-2E1	23.602	18.6131	32.2444	0.215513	105
WBGene00010054	gtf-2E2	35.1832	28.5788	45.7575	0.240575	973.667
WBGene00015296	gtf-2F1	45.9088	34.3767	69.0838	0.396853	714.667
WBGene00012694	gtf-2F2	36.3843	26.72	57.0004	0.417971	288.667
WBGene00019821	gtf-2H1	50.6409	37.9271	76.1766	0.325019	234.667
WBGene00014230	gtf-2H3	14.8819	11.0367	22.8391	0.400125	94.6667
WBGene00020286	gtsf-1	28.6054	20.3006	48.4093	0.424171	443.667
WBGene00020190	guk-1	77.7842	51.4397	159.441	0.343959	1157
WBGene00001808	gut-2	27.4991	21.1906	39.1557	0.291929	795.667
WBGene00016002	gyf-1	33.604	28.0121	41.9854	0.171073	327.333
WBGene00019143	H01M10.1	26.0949	19.4424	39.668	0.336206	195.667
WBGene00019157	H05C05.1	49.2757	36.9002	74.1409	0.309263	753
WBGene00019158	H05C05.2	42.0543	35.0298	52.6027	0.157455	422.333
WBGene00044483	H06H21.11	24.9693	17.5577	43.209	0.488723	113
WBGene00019196	H14A12.3	34.3518	25.2409	53.7553	0.402398	172
WBGene00019199	H14E04.2	27.6644	20.9049	40.884	0.330191	161.667
WBGene00019219	H20J04.4	30.1915	21.1743	52.5851	0.531145	94
WBGene00019221	H20J04.6	36.029	27.0267	54.0238	0.392255	200
WBGene00010409	H21P03.2	16.1498	13.8325	19.3998	0.205493	125.333
WBGene00019250	H28G03.2	56.6075	41.087	90.9719	0.348037	702
WBGene00019259	H34C03.2	20.7347	14.9964	33.5861	0.415344	129.667
WBGene00019264	H35B03.2	26.3219	16.1895	70.3544	0.416824	108
WBGene00044200	H37A05.4	115.318	29.9831	-62.4657	0.631815	99.3333
WBGene00010433	H40L08.1	38.3133	32.729	46.1951	0.0975139	581.333
WBGene00017301	hach-1	24.9841	18.5288	38.3424	0.290274	166.333
WBGene00001812	haf-2	18.9967	14.6829	26.8998	0.312155	75
WBGene00001813	haf-3	25.8655	21.2349	33.0788	0.237008	103.333
WBGene00001820	ham-1	18.4872	13.4724	29.4486	0.452469	976.333
WBGene00044072	ham-3	65.3077	46.3138	110.712	0.400877	1218.67
WBGene00007630	har-1	49.6586	39.4556	66.9791	0.168344	483.667
WBGene00002001	hars-1	34.3197	23.8729	61.0239	0.45461	346.333
WBGene00007258	hasp-1	42.4882	34.4051	55.5356	0.155713	461
WBGene00044069	hat-1	27.9887	20.6819	43.2786	0.378154	349.333
WBGene00001824	hbl-1	59.2298	37.2321	144.754	0.42896	4071
WBGene00001827	hcf-1	53.0595	38.2665	86.4979	0.230324	721.667
WBGene00001829	hcp-1	32.4286	26.8376	40.9623	0.225103	881
WBGene00001830	hcp-2	29.1929	24.4669	36.1818	0.165804	470.333
WBGene00001831	hcp-3	21.3708	15.5653	34.0834	0.429948	710.667
WBGene00001832	hcp-4	29.3193	22.0614	43.694	0.389376	970
WBGene00001833	hcp-6	54.2144	37.9446	94.9095	0.411486	1983
WBGene00001834	hda-1	73.6897	59.0967	97.853	0.276873	1306.33
WBGene00001835	hda-2	28.0562	20.7709	43.2131	0.429923	197.667
WBGene00001836	hda-3	49.7497	32.6481	104.475	0.3274	286.667
WBGene00018319	hda-6	32.9904	24.8455	49.0796	0.304102	330.333
WBGene00016405	hecd-1	68.5699	45.4929	139.163	0.398886	1240.33
WBGene00001840	hel-1	71.105	51.1373	116.656	0.461393	4698.67
WBGene00021905	helq-1	24.908	15.2113	68.705	0.7203	68.3333
WBGene00015767	hex-2	35.2597	26.4124	53.0194	0.299765	352.667
WBGene00021209	hgap-1	44.5998	34.1922	64.1157	0.28152	156
WBGene00008430	hgap-2	29.104	22.3774	41.6128	0.365923	194.667
WBGene00004101	hgrs-1	26.9362	21.1158	37.1862	0.320286	470.667
WBGene00001844	hid-1	67.665	45.0905	135.506	0.521276	703
WBGene00001851	hif-1	56.9308	46.2103	74.1279	0.188307	339
WBGene00001853	hil-2	56.6169	37.655	114.048	0.417822	60307.3
WBGene00001854	hil-3	18.5687	15.0317	24.2826	0.262896	9407.67
WBGene00001858	hil-7	54.3753	46.942	64.6056	0.163392	35294.3
WBGene00001860	him-1	60.5618	38.9911	135.552	0.411567	1448.33
WBGene00001869	him-10	30.0041	21.8685	47.7791	0.425805	678
WBGene00001874	him-17	20.0297	16.2233	26.1695	0.210131	245.667
WBGene00001867	him-8	27.4147	17.1793	67.8248	0.508586	61.3333
WBGene00009553	hinf-1	37.1446	28.8396	52.167	0.353521	990
WBGene00009002	hint-1	43.1507	31.913	66.6043	0.334306	111
WBGene00011735	hip-1	57.3196	41.3457	93.4079	0.352149	935.667
WBGene00022717	hipr-1	28.0187	20.4302	44.5753	0.394204	106.667
WBGene00019627	hira-1	32.1635	26.2174	41.5978	0.103124	181.333
WBGene00001875	his-1	71.9914	60.0479	89.8656	0.132036	1607
WBGene00001892	his-18	64.783	37.9399	221.495	0.495044	318.667
WBGene00001898	his-24	47.4669	39.5107	59.4352	0.199267	85050.7
WBGene00001877	his-3	52.8263	38.8281	82.6078	0.252058	1436
WBGene00001905	his-31	23.45	19.202	30.1116	0.190891	222
WBGene00001906	his-32	40.1249	27.9703	70.9615	0.431621	7776.67
WBGene00001911	his-37	38.9618	30.0165	55.5021	0.320243	1373
WBGene00001878	his-4	69.1209	46.8472	131.773	0.450085	1469.67
WBGene00001914	his-40	45.3546	28.9492	104.672	0.554045	356
WBGene00001915	his-41	61.8011	49.8868	81.1917	0.205847	4416.67
WBGene00001922	his-48	51.7783	33.1268	118.495	0.38382	680
WBGene00001879	his-5	57.992	32.9164	243.455	0.397232	238.667
WBGene00001933	his-59	54.5635	35.336	119.692	0.487631	3105.33
WBGene00001880	his-6	46.741	31.4201	91.2223	0.471251	1158
WBGene00001934	his-60	60.1642	45.6352	88.2654	0.240961	4066.33
WBGene00001935	his-61	59.912	40.8824	112.084	0.353688	1347.67
WBGene00001936	his-62	71.9997	45.8785	167.19	0.577014	2241.33
WBGene00001937	his-63	56.0552	36.2019	124.128	0.336534	1417.33
WBGene00001938	his-64	53.614	42.88	71.5164	0.20312	2684
WBGene00001941	his-67	43.0731	26.466	115.628	0.37312	393.667
WBGene00001942	his-68	37.131	27.5364	56.9874	0.223281	1725
WBGene00001881	his-7	48.5041	33.1779	90.1468	0.282835	504
WBGene00001945	his-71	74.6479	58.0143	104.654	0.155361	1889.67
WBGene00001946	his-72	161.176	93.6635	577.269	0.624793	26268
WBGene00001882	his-8	64.7602	41.5901	146.22	0.473075	330.333
WBGene00011904	hlb-1	45.1281	39.4501	52.7154	0.0695221	543.667
WBGene00001957	hlh-13	56.2649	34.8632	145.717	0.458215	546.667
WBGene00001958	hlh-14	13.1707	9.39626	22.0135	0.47556	654.667
WBGene00001960	hlh-16	41.5181	29.4998	70.0612	0.425788	4220.67
WBGene00001962	hlh-19	26.9576	16.9998	65.078	0.492021	210.333
WBGene00001949	hlh-2	20.0867	15.446	28.7138	0.369984	1399.33
WBGene00001950	hlh-3	18.3184	13.3247	29.2983	0.444389	674.333
WBGene00020930	hlh-30	49.3174	32.9943	97.6045	0.28044	310.667
WBGene00001951	hlh-4	27.6784	21.8141	37.855	0.173518	242.667
WBGene00001971	hmg-1.1	77.4274	56.2752	124.056	0.358341	53266.3
WBGene00001972	hmg-1.2	53.8067	39.0313	86.5831	0.330152	6418.33
WBGene00001977	hmg-12	19.4187	14.2083	30.6635	0.445699	112
WBGene00001975	hmg-5	42.7137	36.1927	52.1008	0.17804	303.667
WBGene00009827	hmg-6	47.7678	30.1302	115.208	0.468798	808.333
WBGene00017268	hmgr-1	28.0334	25.5196	31.0966	0.0667043	118.667
WBGene00017769	hmgs-1	22.5925	17.0606	33.4333	0.393837	210.333
WBGene00001978	hmp-1	41.0335	32.4843	55.6899	0.257934	2206.33
WBGene00001979	hmp-2	28.07	21.7596	39.5355	0.32865	439.667
WBGene00001980	hmr-1	38.4719	30.2473	52.8395	0.223785	1627.33
WBGene00016704	hosl-1	38.6597	26.146	74.1468	0.501424	295.667
WBGene00001991	hot-6	36.9851	22.8102	97.6958	0.305069	173.333
WBGene00001994	hpk-1	82.7078	65.2388	112.953	0.220069	1531.67
WBGene00001995	hpl-1	33.0782	24.9999	48.8697	0.341294	448.667
WBGene00001996	hpl-2	29.5503	23.3347	40.2792	0.304883	623.333
WBGene00017158	hpo-10	38.7397	26.9109	69.1231	0.396528	536.333
WBGene00010427	hpo-11	41.0681	31.9047	57.6159	0.215712	467.667
WBGene00016588	hpo-12	43.0523	35.5235	54.6304	0.220863	271
WBGene00013670	hpo-13	23.1151	19.7245	27.9135	0.171279	164.667
WBGene00020268	hpo-19	23.2198	16.3162	40.2505	0.572326	77
WBGene00021754	hpo-29	77.7969	50.6289	167.886	0.445814	773.333
WBGene00010089	hpo-31	33.8363	23.5751	59.9144	0.439741	79.3333
WBGene00009744	hpo-35	44.3329	32.9891	67.5669	0.230832	168
WBGene00020517	hpo-8	85.0133	63.3658	129.127	0.319422	594
WBGene00015463	hpo-9	19.2818	17.1757	21.9765	0.134458	186.333
WBGene00001998	hpr-17	17.1827	12.97	25.4484	0.399147	51.6667
WBGene00020403	hrde-4	43.0515	29.0546	83.0703	0.5011	154.667
WBGene00009164	hrdl-1	19.6829	17.2512	22.9126	0.0736366	158
WBGene00019830	hrg-1	36.3248	25.6728	62.0845	0.282436	182.333
WBGene00001999	hrpa-1	59.542	45.2433	87.0545	0.31198	10981.7
WBGene00020936	hrpf-1	33.0739	25.1858	48.1564	0.320336	606.333
WBGene00022253	hrpf-2	28.2794	21.2786	42.1458	0.357379	602.333
WBGene00017816	hrpk-1	54.579	47.1612	64.7657	0.157439	922.333
WBGene00015557	hrpk-2	31.8123	22.6705	53.3092	0.35521	99.3333
WBGene00016624	hrpl-1	43.1794	29.2157	82.7118	0.379773	337
WBGene00002000	hrpr-1	83.0396	58.4932	143.085	0.330528	5225.67
WBGene00012769	hrpu-1	41.992	30.6377	66.7176	0.311981	730.333
WBGene00022134	hrpu-2	60.5662	42.4333	105.761	0.372304	1200.33
WBGene00002004	hsf-1	33.2492	25.051	49.4235	0.30326	266.667
WBGene00002005	hsp-1	68.7427	49.636	111.765	0.394098	3094.67
WBGene00016250	hsp-110	33.6978	30.0547	38.3459	0.135321	514.667
WBGene00002015	hsp-16.1	21.662	15.5459	35.7116	0.407191	755.333
WBGene00002016	hsp-16.2	36.652	25.3309	66.2701	0.148813	913.667
WBGene00002018	hsp-16.41	36.9509	26.7365	59.7949	0.335721	1587.33
WBGene00002023	hsp-25	51.6257	25.7019	-5983.17	0.200133	92.3333
WBGene00002007	hsp-3	149.581	88.172	492.802	0.614411	5609.33
WBGene00002008	hsp-4	40.4482	31.4775	56.5699	0.235892	421.333
WBGene00002010	hsp-6	42.5951	29.9938	73.4565	0.345447	150.667
WBGene00002027	hsr-9	40.7806	28.5113	71.5868	0.416196	2047.67
WBGene00002029	hst-2	29.8876	23.715	40.4039	0.155367	221
WBGene00044303	hst-3.2	15.2504	11.5312	22.511	0.337712	199.667
WBGene00002031	hst-6	31.821	23.8271	47.8866	0.358281	582.333
WBGene00019947	htz-1	150.357	96.4328	341.09	0.557333	22955
WBGene00002035	hum-1	30.9244	22.0636	51.6791	0.348047	216.333
WBGene00002036	hum-2	29.5247	22.2839	43.7361	0.357758	332.667
WBGene00002038	hum-5	48.1452	38.8491	63.2896	0.16174	94.3333
WBGene00002040	hum-7	40.5618	26.9401	82.0471	0.464003	117
WBGene00013740	hut-1	30.4221	23.2927	43.8406	0.283946	175
WBGene00022306	hxk-3	36.6529	27.3587	55.5108	0.18593	424
WBGene00002044	hyl-2	44.3611	32.4653	70.0161	0.324825	239
WBGene00015466	hyls-1	26.3969	21.4874	34.2145	0.22733	335.667
WBGene00002152	iars-1	53.8815	43.3161	71.2636	0.219411	392.333
WBGene00002045	icd-1	144.141	87.8276	401.715	0.502825	1756.67
WBGene00022042	icd-2	156.729	92.865	501.859	0.481694	3724
WBGene00002046	icln-1	37.0647	23.7906	83.8477	0.471631	218.667
WBGene00002047	icp-1	25.9416	17.9652	46.6566	0.523182	1041
WBGene00010317	idh-1	41.0127	33.4536	52.9852	0.152166	625.333
WBGene00007942	idh-2	51.5847	37.0705	84.7776	0.245536	204.333
WBGene00009664	idha-1	98.3236	64.7404	204.303	0.395246	1025.33
WBGene00007993	idhb-1	76.5302	49.5637	167.858	0.478081	332.333
WBGene00009440	idhg-1	80.5406	56.6841	139.071	0.376838	770.667
WBGene00002053	ifb-1	42.1643	28.44	81.488	0.405439	66
WBGene00002060	ife-2	38.9919	27.7379	65.6129	0.378305	1024.67
WBGene00002061	ife-3	33.1332	23.2307	57.7502	0.501606	110.333
WBGene00002062	ife-4	22.2356	17.7516	29.7505	0.273392	592
WBGene00004132	ifet-1	33.8174	26.4101	46.9995	0.332272	909.333
[truncated: 2,764 more rows]

## Sheet: Legend
This table lists the neuron-specific mRNA half-lives calculated for each gene from our single-cell RNA sequencing data that met our moderate filtering criteria. Half-lives corresponding to the upper and lower limits of a 95% confidence interval are also included. The half_life_coefficient_of_variation column corresponds to the coefficient of variation calculated for half-lives across all three bi…
