# Supplementary material for: A spatiotemporally resolved atlas of mRNA decay in the C. elegans embryo reveals differential regulation of mRNA stability across stages and cell types
Source: HighWire-hosted journal article supplement (doi:10.1101/gr.278980.124), 2024-08-01
Supplement: Supplemental_Table_S11.xlsx [file Supplemental_Table_S11.xlsx]

## Sheet: Supplemental Table S11
Supplemental Table S11: Pharynx-specific mRNA half-lives
wormbaseID	gene	half_life	lower_limit_half_life	upper_limit_half_life	half_life_coefficient_of_variation	mean_tp0_umi
WBGene00007063	2L52.1	84.6578	49.0148	310.316	0.399768	346.667
WBGene00009583	aagr-3	107.213	89.2666	134.19	0.208374	1297
WBGene00020142	aak-2	43.5953	35.5729	56.2898	0.238666	260
WBGene00010115	aakb-1	41.1951	29.3465	69.0902	0.415154	119.333
WBGene00012928	aakb-2	67.6326	49.2123	108.092	0.128665	383
WBGene00013732	aakg-1	39.0311	31.1184	52.3397	0.166947	281
WBGene00020633	aakg-2	37.5123	25.4471	71.3336	0.406961	252.667
WBGene00000001	aap-1	35.2659	26.6117	52.2617	0.296406	100
WBGene00000196	aars-1	31.1411	24.8672	41.6489	0.232089	172.333
WBGene00000197	aars-2	100.089	54.4757	615.221	0.332503	234.667
WBGene00000003	aat-2	30.8827	18.7575	87.3412	0.904978	105
WBGene00000004	aat-3	59.8877	40.9378	111.501	0.320202	631
WBGene00022269	aatf-1	46.5079	37.3734	61.5519	0.253378	310.667
WBGene00012714	abce-1	51.5853	36.1047	90.3054	0.391154	170.667
WBGene00006512	abcf-1	78.292	55.7317	131.539	0.364964	337
WBGene00012097	abcf-2	261.895	143.249	1524.93	0.212173	1416.33
WBGene00018339	abcf-3	53.4199	37.9818	90.0019	0.415291	248.333
WBGene00011029	abhd-11.2	29.3773	23.0093	40.6188	0.156598	126
WBGene00022393	abhd-12	42.5763	31.2519	66.7715	0.290537	280.667
WBGene00015146	abi-1	25.4848	19.9229	35.3549	0.303185	388
WBGene00000018	abl-1	42.9905	34.4667	57.1155	0.184769	697.667
WBGene00022281	abtm-1	50.6087	33.063	107.833	0.247171	101.333
WBGene00009920	abts-1	71.5636	49.7097	127.708	0.432886	641
WBGene00004174	abu-14	34.5087	20.8782	99.4091	0.66354	227
WBGene00009952	acaa-2	63.3883	47.2525	96.259	0.266715	237.667
WBGene00011731	acbp-5	38.7695	26.1236	75.1458	0.369053	54.6667
WBGene00020366	acdh-10	68.4911	40.1685	232.25	0.437173	168.667
WBGene00017125	acdh-12	64.3463	39.4551	174.321	0.658019	225
WBGene00001566	acdh-13	26.9281	21.6237	35.6808	0.152446	86.3333
WBGene00020812	acdh-7	56.4987	37.2642	116.773	0.433858	899.333
WBGene00017874	acdh-9	54.5752	37.3525	101.268	0.192839	120.333
WBGene00016601	acin-1	90.5959	61.1211	174.975	0.303323	1783
WBGene00019465	acl-14	41.4801	34.5873	51.8039	0.184229	348.333
WBGene00011543	acl-2	32.9889	26.6613	43.2545	0.259657	131
WBGene00018657	acl-4	43.3917	35.7958	55.0799	0.122961	288.333
WBGene00011106	acl-5	53.0502	38.389	85.8296	0.371646	221
WBGene00017261	acl-6	19.4258	17.0673	22.5406	0.0267991	71.3333
WBGene00020264	acl-8	28.0551	20.05	46.7008	0.23848	67
WBGene00022646	acl-9	55.8163	36.0211	123.912	0.404057	148
WBGene00000040	aco-1	92.9753	60.6502	199.08	0.640895	376
WBGene00000041	aco-2	64.7582	39.3555	182.659	0.412965	252
WBGene00022037	acs-13	32.2722	26.1832	42.0514	0.221432	321.667
WBGene00018152	acs-4	80.2131	62.2539	112.735	0.214295	806.333
WBGene00000063	act-1	71.5806	45.2818	170.747	0.611962	1466.67
WBGene00000064	act-2	44.6525	29.2972	93.831	0.431541	1991.67
WBGene00000065	act-3	187.646	99.6907	1594	0.454394	959.333
WBGene00000068	acy-1	32.9808	21.283	73.2307	0.397408	88.3333
WBGene00017967	ada-2	25.6686	18.964	39.7066	0.381743	794
WBGene00015551	adah-1	61.6335	46.4908	91.4055	0.251306	1209.67
WBGene00012157	adbp-1	29.6616	21.3775	48.4281	0.385334	151.667
WBGene00019240	adh-5	70.9632	52.3333	110.189	0.332174	366.333
WBGene00011128	adk-1	107.847	71.3054	221.212	0.341742	410.667
WBGene00000074	adm-2	25.4155	18.1777	42.2299	0.43389	69.6667
WBGene00000079	adr-1	59.1556	40.903	106.825	0.279288	498.333
WBGene00011064	adsl-1	28.6273	21.2676	43.776	0.304541	130.333
WBGene00021009	afd-1	82.9346	68.5169	105.037	0.127423	2358.67
WBGene00021912	affl-2	22.2356	17.5229	30.4158	0.210732	105.667
WBGene00000090	age-1	30.2499	24.4136	39.7536	0.116652	113
WBGene00012386	agef-1	71.262	47.0793	146.527	0.390355	347.333
WBGene00011050	agl-1	36.2925	26.2529	58.7655	0.341886	230
WBGene00018304	agr-1	112.372	69.6665	290.359	0.194921	1787
WBGene00000092	ags-3	91.0524	75.6285	114.379	0.142068	718.333
WBGene00000094	agt-2	28.1269	21.2019	41.77	0.28025	312.333
WBGene00011767	agxt-1	80.7141	45.8347	337.693	0.213819	164
WBGene00014999	AH9.3	73.0538	54.2794	111.683	0.261229	404.333
WBGene00175029	AH9.7	24.211	17.4056	39.7546	0.111294	103
WBGene00000095	aha-1	23.6972	17.9532	34.846	0.332875	351
WBGene00045192	aho-3	27.3068	19.3584	46.329	0.389368	450.667
WBGene00007235	ahsa-1	136.172	94.7646	241.847	0.164971	1084.33
WBGene00015547	ain-1	66.385	53.0492	88.6772	0.172768	2939
WBGene00015007	ain-2	114.398	58.8176	2078.36	0.615862	1486.33
WBGene00000097	aip-1	43.8299	27.4956	107.975	0.368795	339
WBGene00010685	aipl-1	43.9787	38.1009	52.0008	0.141357	452.333
WBGene00016966	aipr-1	44.2275	30.7819	78.5291	0.174171	207.667
WBGene00000098	air-1	34.84	28.1991	45.5723	0.228828	562.667
WBGene00000099	air-2	30.1535	23.1005	43.4061	0.282549	879.333
WBGene00000101	aka-1	42.7767	35.2652	54.354	0.0701222	349.667
WBGene00016977	akap-1	63.7576	53.1276	79.7054	0.0158555	533.333
WBGene00017088	akir-1	39.8963	28.3641	67.231	0.36494	1162
WBGene00000102	akt-1	54.4961	36.7891	105.065	0.399891	152.333
WBGene00000103	akt-2	35.3229	27.2329	50.2508	0.219923	99.3333
WBGene00017547	alfa-1	20.8447	17.7741	25.1979	0.18782	163.667
WBGene00000105	alg-1	58.9476	41.4556	101.976	0.235849	663.667
WBGene00000106	alg-2	71.0553	57.3696	93.316	0.111163	734.667
WBGene00011193	algn-13	26.9899	18.2299	51.9567	0.498878	127
WBGene00017282	algn-2	66.0528	45.5987	119.784	0.413963	112.667
WBGene00010720	algn-3	55.6633	42.8487	79.4129	0.230961	235
WBGene00019276	algn-5	60.4148	49.6968	77.0271	0.101865	378.333
WBGene00000110	alh-4	35.4878	27.3337	50.5754	0.262237	54.6667
WBGene00000112	alh-6	35.5705	27.2484	51.2113	0.200982	159.667
WBGene00000114	alh-8	306.896	172.323	1400.92	0.643701	505.667
WBGene00000115	alh-9	21.5878	18.224	26.4743	0.144406	174
WBGene00021783	alkb-1	55.5798	41.6009	83.7075	0.269327	134.667
WBGene00007581	alkb-8	42.4465	30.005	72.515	0.33531	72
WBGene00011292	allo-1	34.5274	24.0271	61.3292	0.384788	548
WBGene00007010	alx-1	47.0377	39.3381	58.4847	0.173306	359
WBGene00000120	aly-1	69.9111	52.2613	105.562	0.291139	1989.33
WBGene00000121	aly-2	34.2383	26.3353	48.9181	0.240164	410.333
WBGene00000122	aly-3	87.4607	66.0033	129.59	0.163092	2443.67
WBGene00000123	ama-1	75.0528	54.563	120.186	0.16653	1124.33
WBGene00010284	aman-2	67.1128	49.7275	103.189	0.402087	560.667
WBGene00010272	amph-1	38.3252	30.8074	50.6966	0.210493	361.333
WBGene00000137	amx-1	21.0235	17.862	25.5447	0.196751	201
WBGene00013038	ani-1	61.9646	48.917	84.5044	0.201691	1100
WBGene00000142	aos-1	18.1162	15.4	21.9955	0.123299	136
WBGene00000161	apa-2	67.6712	56.6819	83.9464	0.0574079	470
WBGene00000160	apb-1	119.506	93.6592	165.056	0.0606976	675.333
WBGene00000163	apb-3	105.648	71.0601	205.839	0.135147	764.333
WBGene00000145	apc-11	39.8056	33.4166	49.2153	0.175767	172
WBGene00000143	apc-2	32.1858	24.3439	47.4804	0.195376	193.333
WBGene00000162	apd-3	65.3721	49.7416	95.3268	0.187869	638
WBGene00000146	ape-1	23.2331	17.9974	32.765	0.306715	703.333
WBGene00000158	apg-1	108.829	79.5268	172.321	0.250467	737.333
WBGene00000147	aph-1	52.5841	37.5449	87.7234	0.344815	201.333
WBGene00000148	aph-2	69.9132	42.4277	198.516	0.686631	475.333
WBGene00000164	apm-3	66.6045	52.3533	91.5162	0.162865	680.333
WBGene00000151	apn-1	28.547	21.3189	43.1904	0.302278	150
WBGene00000156	apr-1	19.4668	15.6118	25.8497	0.293145	587.333
WBGene00000157	aps-2	36.3204	29.6863	46.773	0.180798	599
WBGene00000165	aps-3	27.2668	23.6448	32.1992	0.150318	223.333
WBGene00017244	apy-1	34.5575	27.087	47.7179	0.212493	129
WBGene00000178	aqp-10	195.529	98.1761	23323.1	0.432974	1133.33
WBGene00000179	aqp-11	51.5404	37.2635	83.5521	0.154726	127.667
WBGene00016158	ari-1.1	27.9312	21.4891	39.8894	0.317492	200.333
WBGene00016156	ari-1.3	33.8619	25.549	50.1934	0.268159	106
WBGene00013538	ari-1.4	31.789	26.0133	40.8614	0.205393	579
WBGene00020462	ari-2	25.373	21.3793	31.2017	0.0876008	194
WBGene00044689	arid-1	37.8695	27.0824	62.9382	0.387319	436
WBGene00000186	ark-1	35.8924	26.4592	55.7785	0.287065	178.333
WBGene00000187	arl-1	42.254	32.1389	61.6603	0.0766525	190
WBGene00000192	arl-8	77.448	61.0026	106.033	0.226022	812
WBGene00013168	arp-1	62.8661	50.4115	83.4939	0.247958	682.667
WBGene00016793	arp-11	20.3719	17.2336	24.9076	0.210678	161.333
WBGene00000195	arr-1	23.4493	18.6422	31.597	0.268618	262.667
WBGene00020205	arrd-1	73.028	49.3754	140.178	0.299413	520
WBGene00007296	arrd-25	34.4673	28.445	43.7244	0.209747	691.667
WBGene00014159	arrd-4	39.076	30.1547	55.4938	0.279151	608.333
WBGene00000198	art-1	91.3214	71.8038	125.41	0.151583	332
WBGene00000200	arx-2	78.5112	58.5728	119.029	0.290948	608.333
WBGene00000201	arx-3	170.761	96.8122	723.055	0.237328	843
WBGene00021170	arx-4	37.5826	29.7336	51.0618	0.250327	491
WBGene00000203	arx-5	66.393	55.3609	82.9161	0.212509	588
WBGene00000205	arx-7	27.6714	21.032	40.4361	0.304556	645.667
WBGene00000206	asb-1	40.0922	26.6306	81.0745	0.351268	167.667
WBGene00016019	ascc-1	47.2367	31.3438	95.8246	0.19509	120.667
WBGene00011279	asd-1	74.8388	54.0533	121.598	0.252614	733.667
WBGene00006423	asd-2	81.0787	67.9989	100.389	0.0752802	2047
WBGene00000209	asg-1	71.8828	53.83	108.154	0.278725	1048.33
WBGene00000210	asg-2	131.792	105.934	174.348	0.18426	702.667
WBGene00012458	ash-2	44.4475	35.4745	59.4967	0.21363	551.667
WBGene00014025	asna-1	66.0191	55.4346	81.5994	0.14002	275.667
WBGene00000217	asp-4	312.986	94.1597	-236.396	0.504153	3428.67
WBGene00008107	aspm-1	39.625	31.9133	52.2511	0.182452	577.333
WBGene00007100	asps-1	20.433	16.1588	27.7814	0.256477	76.3333
WBGene00020368	ast-1	50.5555	31.0853	135.3	0.346913	924.667
WBGene00010015	atad-3	35.4782	26.9647	51.8482	0.241208	308
WBGene00021059	atat-2	31.6703	20.6486	67.9293	0.368333	62
WBGene00010615	ate-1	61.3696	46.0836	91.8295	0.228081	231
WBGene00000220	atf-2	41.1023	31.7294	58.3344	0.336669	1093.33
WBGene00000221	atf-4	59.2586	39.9216	114.925	0.0868552	232
WBGene00000222	atf-6	63.5172	45.5159	105.073	0.315816	484
WBGene00000223	atf-7	52.2938	42.4636	68.0463	0.0996506	885.667
WBGene00013878	atfs-1	18.0304	14.0526	25.1494	0.0969591	84
WBGene00017045	atg-13	22.7747	17.6038	32.247	0.32627	466
WBGene00017178	atg-16.1	40.984	28.5165	72.8223	0.379779	250
WBGene00019427	atg-16.2	78.8066	57.992	122.928	0.112772	461.333
WBGene00018294	atg-18	55.3285	39.8216	90.6146	0.298621	661.667
WBGene00019748	atg-2	75.2762	68.2133	83.9708	0.0257931	1881.33
WBGene00021922	atg-3	34.8285	30.2278	41.0811	0.134437	282.667
WBGene00014080	atg-4.2	29.1342	21.7039	44.3001	0.333968	155.667
WBGene00022152	atg-5	31.1632	23.1122	47.8214	0.265935	167.333
WBGene00020706	atg-9	53.7125	42.7125	72.3437	0.124318	339
WBGene00015484	atgl-1	16.4716	13.2868	21.6644	0.264437	262.667
WBGene00000224	atgp-1	101.925	69.1576	193.701	0.212458	615.333
WBGene00010564	ath-1	106.272	54.2261	2642.61	0.239876	87.3333
WBGene00008081	athp-1	32.0381	25.173	44.0518	0.227229	198
WBGene00019217	athp-2	51.9569	39.0961	77.4264	0.290766	235.667
WBGene00000226	atl-1	31.2372	26.1727	38.7319	0.152277	256.333
WBGene00021868	atln-1	84.1847	61.9568	131.285	0.308424	557.333
WBGene00000227	atm-1	52.4526	36.6127	92.4492	0.459235	199.333
WBGene00000228	atn-1	59.6713	44.3884	91.0041	0.190101	350.333
WBGene00010419	atp-1	162.234	121.493	244.081	0.226032	2819
WBGene00000229	atp-2	188.236	112.433	577.779	0.500618	3037.67
WBGene00000230	atp-3	125.207	85.0458	237.241	0.204605	2056.67
WBGene00020275	atp-4	143.881	114.57	193.345	0.158401	1916.33
WBGene00007385	atp-5	156.702	106.104	299.544	0.151561	1878
WBGene00010960	atp-6	67.3158	51.5649	96.9212	0.211442	14621.7
WBGene00006432	atrn-1	56.6871	47.2853	70.7555	0.12839	607.667
WBGene00017317	attf-2	83.9403	61.8674	130.5	0.219723	5716
WBGene00018794	attf-3	29.3562	22.4276	42.4795	0.199699	99
WBGene00015477	attf-4	30.5378	21.5726	52.2535	0.356448	284.667
WBGene00020214	attf-5	59.9885	35.9363	181.4	0.417918	120.667
WBGene00012474	attf-6	36.4204	28.5922	50.1512	0.154283	285
WBGene00000231	atx-2	79.2698	60.6263	114.472	0.221842	912.667
WBGene00009212	atz-1	111.832	68.9655	295.503	0.805439	8260.33
WBGene00007088	B0001.3	56.8572	39.3683	102.305	0.25521	293
WBGene00007089	B0001.4	59.942	42.2382	103.196	0.452018	165
WBGene00007093	B0001.8	20.087	14.3955	33.2217	0.516584	64
WBGene00007094	B0019.2	33.6388	22.8225	63.9431	0.396801	99.3333
WBGene00007101	B0024.11	38.8251	29.5033	56.7581	0.335673	403.667
WBGene00015001	B0025.4	29.5474	20.2487	54.6384	0.346696	163.333
WBGene00007113	B0035.15	27.7754	22.6673	35.8555	0.0307741	178.667
WBGene00007106	B0035.3	14.8889	11.3054	21.7984	0.291988	79.6667
WBGene00206362	B0041.11	96.2846	58.9817	261.962	0.520185	71
WBGene00015009	B0041.5	22.6487	19.8685	26.3335	0.0838161	292
WBGene00015011	B0041.8	30.2202	20.7053	55.9154	0.401309	625
WBGene00007116	B0198.3	28.0341	21.2143	41.3161	0.271034	61.3333
WBGene00015017	B0205.1	28.1003	21.0267	42.3459	0.25759	208
WBGene00015022	B0205.8	58.0717	39.3496	110.779	0.360086	816
WBGene00015023	B0205.9	22.1189	15.9785	35.9244	0.433361	109.333
WBGene00015029	B0207.6	17.0246	11.9515	29.5808	0.455139	84.6667
WBGene00015075	B0238.11	56.5763	39.9073	97.1586	0.389974	1872
WBGene00050927	B0250.12	47.4368	36.1035	69.1409	0.366183	227.667
WBGene00007121	B0250.4	80.8734	49.5678	219.509	0.748704	169.667
WBGene00007122	B0250.5	53.4356	37.3203	94.0457	0.38401	300.333
WBGene00015091	B0261.1	47.4767	39.0616	60.5133	0.128922	232.667
WBGene00015096	B0261.8	87.071	64.6728	133.203	0.145292	599.667
WBGene00015104	B0280.9	30.5281	24.0501	41.7822	0.247923	270
WBGene00015112	B0281.5	28.2963	19.6827	50.3159	0.381615	649.667
WBGene00007136	B0285.3	50.4672	36.7997	80.2853	0.315605	767.333
WBGene00015115	B0286.1	82.9879	65.5283	113.131	0.240231	1079
WBGene00015122	B0302.5	38.1631	26.0784	71.1205	0.325489	66.6667
WBGene00015125	B0303.3	69.4116	53.4075	99.111	0.2318	530.667
WBGene00015126	B0303.4	27.5968	22.8912	34.7376	0.220129	214.667
WBGene00015128	B0303.7	26.0752	18.3958	44.7604	0.441788	116.667
WBGene00007144	B0334.4	26.8417	21.2774	36.3469	0.242926	346
WBGene00015150	B0336.13	29.3984	22.5613	42.1813	0.27199	81
WBGene00015147	B0336.7	17.1137	14.7689	20.3434	0.151011	56.6667
WBGene00015155	B0353.1	29.1648	20.4687	50.7081	0.460081	196.667
WBGene00015157	B0361.3	26.0132	22.0041	31.8088	0.19145	205.667
WBGene00015160	B0361.6	31.5472	22.6746	51.8273	0.39086	137.333
WBGene00007168	B0393.3	30.8826	20.1576	65.9968	0.557221	354.333
WBGene00007170	B0393.5	55.9232	34.3243	150.842	0.640747	118.333
WBGene00007175	B0395.3	40.2909	28.0137	71.7246	0.287013	258.667
WBGene00015181	B0416.5	186.209	109.889	609.575	0.385647	1860.33
WBGene00015191	B0432.10	31.4689	25.9882	39.8789	0.0860708	151.667
WBGene00007186	B0464.6	35.4293	26.7011	52.635	0.301358	466.333
WBGene00007193	B0491.6	30.2115	20.7333	55.6535	0.530197	120.333
WBGene00015204	B0495.5	29.0283	22.7187	40.1901	0.0861034	103
WBGene00015206	B0495.7	85.9095	58.9176	158.543	0.388639	185.667
WBGene00015208	B0495.9	28.2216	20.9585	43.1883	0.325016	515.333
WBGene00015237	B0511.12	75.8133	56.3394	115.861	0.14226	828.333
WBGene00015232	B0511.6	186.69	85.1041	-963.973	0.543374	1266.67
WBGene00015233	B0511.7	25.4384	18.8751	38.9994	0.359884	253.333
WBGene00015251	B0546.4	61.7654	56.3513	68.3305	0.0420914	224.333
WBGene00000235	baf-1	62.2905	43.5113	109.588	0.337177	2666.67
WBGene00000236	bag-1	44.9489	31.4062	79.0258	0.422923	431.667
WBGene00000237	bam-2	26.4794	22.9223	31.3433	0.0358783	216.667
WBGene00021726	bath-10	31.2487	22.4812	51.2271	0.367325	1376.33
WBGene00009945	bath-38	102.2	62.4862	280.439	0.691437	1211.33
WBGene00013689	bath-40	14.3386	12.2944	17.1983	0.208099	126.333
WBGene00018137	bath-41	17.1645	12.6905	26.5106	0.394658	182.667
WBGene00016803	bath-42	23.7464	18.1827	34.2163	0.336318	581.333
WBGene00015567	bath-44	19.5758	16.0792	25.0156	0.244281	217.333
WBGene00021725	bath-9	25.8558	21.0906	33.4029	0.235378	914.667
WBGene00001470	baz-2	24.7503	18.9289	35.7426	0.355054	1209
WBGene00020441	bcas-2	28.3357	22.7039	37.6834	0.278831	217.333
WBGene00012713	bckd-1A	46.1829	35.2942	66.7877	0.228314	113.333
WBGene00006518	bckd-1B	26.5286	20.1846	38.6884	0.174236	109.667
WBGene00016192	bcl-7	58.3591	42.8757	91.3462	0.293405	1213.33
WBGene00000247	bec-1	28.1504	22.2068	38.4384	0.270544	273.667
WBGene00012674	bed-1	29.0042	25.3405	33.9064	0.161064	329.333
WBGene00012943	bed-2	37.0563	27.858	55.323	0.303043	972
WBGene00206487	best-19	36.9803	31.7208	44.3307	0.113217	118
WBGene00022473	bet-1	49.5004	39.9778	64.9781	0.258956	1590
WBGene00010199	bet-2	46.3938	39.8408	55.5268	0.114512	1766
WBGene00016611	bicd-1	84.4241	67.0957	113.82	0.220611	681
WBGene00000249	bir-1	53.1038	41.2633	74.4739	0.247648	1139.67
WBGene00014569	bkip-1	29.0015	17.8425	77.4226	0.46267	67.3333
WBGene00000254	bli-4	82.0778	58.8558	135.566	0.123105	194.333
WBGene00011872	blos-1	20.4989	15.1317	31.7666	0.355213	184.333
WBGene00022251	blos-2	28.3239	21.6322	41.0096	0.337403	93
WBGene00021376	blos-7	24.0692	18.8082	33.4163	0.247684	79.3333
WBGene00010981	blos-8	30.8444	19.4459	74.5327	0.679106	549.333
WBGene00010767	blos-9	20.6614	16.7847	26.8668	0.186626	126.333
WBGene00000257	bmk-1	51.2075	39.6778	72.1822	0.0848688	1234.33
WBGene00017293	bmy-1	47.2867	39.3717	59.1848	0.154313	480.667
WBGene00000259	bpl-1	22.0944	16.1928	34.7646	0.418512	102
WBGene00044063	bpnt-1	24.9302	21.928	28.8849	0.0982352	258
WBGene00000262	bra-1	40.6463	28.0757	73.6002	0.360099	539.333
WBGene00017757	bra-2	67.895	48.8331	111.367	0.306978	823
WBGene00017144	brap-2	19.3206	16.8119	22.7095	0.0658342	109
WBGene00000264	brc-1	22.1184	17.4322	30.2505	0.261755	221.333
WBGene00020316	brc-2	38.8623	28.9834	58.9578	0.184779	223
WBGene00000265	brd-1	26.2135	22.7179	30.9805	0.0764626	366
WBGene00000270	bre-5	15.4541	12.1196	21.3197	0.318515	66.6667
WBGene00000271	brf-1	33.622	22.5551	66.0111	0.502565	270.333
WBGene00019726	bris-1	24.2729	19.9001	31.1085	0.22663	117.333
WBGene00019700	btb-11	35.6755	22.3535	88.2987	0.558428	75.6667
WBGene00019888	btbd-10	29.8223	22.4852	44.2671	0.296511	226
WBGene00000274	btf-1	40.5222	27.7105	75.3677	0.281191	135
WBGene00000275	bub-1	25.3841	19.7953	35.3702	0.296131	865.667
WBGene00013209	bub-3	47.3537	32.4063	87.8954	0.355956	901.333
WBGene00007400	bud-31	25.8814	20.8733	34.0513	0.245421	780.333
WBGene00000276	byn-1	77.9046	48.5659	196.779	0.65742	311
WBGene00007213	C01A2.1	47.6104	34.0353	79.1995	0.43783	252.667
WBGene00007216	C01A2.4	35.5545	27.1133	51.6278	0.210212	104.667
WBGene00015283	C01B10.9	36.7317	25.8426	63.4793	0.273728	126
WBGene00015291	C01B12.8	22.6773	15.5925	41.5618	0.439041	276.333
WBGene00015301	C01F1.6	43.0716	27.9803	93.5029	0.356264	100.667
WBGene00219207	C01F6.14	48.1737	28.1546	166.715	0.475282	90.3333
WBGene00007237	C01G10.10	19.6085	15.9727	25.3874	0.223293	105.667
WBGene00007236	C01G10.9	48.5103	34.0225	84.4877	0.29556	188.333
WBGene00007225	C01G6.3	60.3383	52.4512	71.0173	0.133206	2319.67
WBGene00007226	C01G6.4	70.1451	44.8907	160.359	0.0767781	184
WBGene00007227	C01G6.5	27.3363	21.6338	37.1212	0.24782	248.333
WBGene00015328	C02B10.3	65.098	39.217	191.433	0.563507	312.333
WBGene00015329	C02B10.4	45.0777	36.0536	60.1273	0.21715	1113
WBGene00015330	C02B10.5	17.9302	14.1766	24.3873	0.229648	457.333
WBGene00015324	C02B8.6	47.3732	34.7333	74.476	0.31511	392
WBGene00015336	C02D5.2	24.7961	21.1155	30.0308	0.198382	60.6667
WBGene00015357	C02F12.8	21.7285	15.1022	38.7158	0.527986	70.6667
WBGene00015352	C02F5.12	28.9715	24.1284	36.247	0.202156	376.333
WBGene00015346	C02F5.3	115.291	93.6297	149.992	0.0108367	301.667
WBGene00015378	C03B1.7	48.2215	35.9864	73.0618	0.340724	154.333
WBGene00015405	C03H5.3	56.3465	42.7611	82.5835	0.295254	389.667
WBGene00007286	C04A11.2	23.7113	19.0967	31.2667	0.227861	251
WBGene00206529	C04A2.15	39.5602	27.3196	71.6737	0.373239	58.3333
WBGene00015425	C04E6.11	41.7292	24.5725	138.271	0.194665	75.3333
WBGene00015430	C04E7.3	89.6685	52.0662	322.781	0.473769	76.3333
WBGene00007302	C04F12.8	33.8162	24.9686	52.3756	0.29961	97.3333
WBGene00015450	C04F5.8	45.702	33.8759	70.2133	0.313031	109
WBGene00015451	C04F5.9	17.9541	12.895	29.546	0.48566	51.3333
WBGene00015454	C04G6.4	50.6807	29.6131	175.626	0.269475	71
WBGene00007317	C05A9.2	47.4687	38.2634	62.5063	0.147084	1992
WBGene00007329	C05C10.2	37.7141	33.526	43.098	0.0607497	254.333
WBGene00015460	C05C8.1	16.1979	13.2814	20.7557	0.127725	53.3333
WBGene00015462	C05C8.5	34.7579	28.6331	44.2159	0.103067	72
WBGene00015480	C05D10.4	55.161	42.85	77.3975	0.126532	120.333
WBGene00015481	C05D11.1	53.9136	42.6541	73.2493	0.166216	131.333
WBGene00015485	C05D11.8	36.4466	25.4584	64.1229	0.393481	194
WBGene00015474	C05D9.7	34.8828	23.3192	69.1954	0.42037	1017.33
WBGene00015494	C05E11.3	61.4807	43.2509	106.274	0.212656	448.667
WBGene00007348	C05G5.2	27.4962	24.4574	31.3973	0.0652515	96.3333
WBGene00007349	C05G5.3	404.882	201.912	-77283.5	0.718422	147
WBGene00007351	C05G5.5	39.7773	26.8326	76.8524	0.443887	860
WBGene00015501	C06A5.3	38.5399	31.6428	49.2816	0.16638	950.333
WBGene00015507	C06A6.2	21.0617	17.4269	26.6124	0.232209	305
WBGene00015517	C06A8.8	30.4467	21.3064	53.321	0.487119	72.6667
WBGene00007372	C06B8.7	51.1157	42.9758	63.0596	0.160453	1137.67
WBGene00015518	C06E1.1	50.0563	33.2296	101.406	0.420707	1331.67
WBGene00015529	C06E2.5	13.0639	9.97976	18.9067	0.3741	613.667
WBGene00015531	C06E4.2	36.491	29.2215	48.5753	0.232007	274.667
WBGene00015541	C06E7.4	30.7394	21.9351	51.3502	0.298965	483.667
WBGene00015552	C06G3.6	113.174	73.7842	242.789	0.427124	1793.67
WBGene00007386	C06H2.2	37.5399	27.8227	57.6876	0.282766	175.333
WBGene00015561	C07A12.7	62.9411	45.4024	102.559	0.3317	868.333
WBGene00007405	C07A9.9	20.7948	15.7116	30.7401	0.272036	70
WBGene00015569	C07D10.5	100.932	78.3954	141.653	0.196413	2077.67
WBGene00015579	C07H6.2	37.051	25.3877	68.5376	0.500312	241
WBGene00007429	C08B6.8	22.7352	17.4527	32.6032	0.325848	375.667
WBGene00015613	C08F1.10	49.0175	35.6781	78.2879	0.331793	4906.33
WBGene00015610	C08F1.6	35.7622	27.4461	51.3088	0.250848	1458
WBGene00007444	C08F8.2	33.5183	21.6018	74.7583	0.515154	45.6667
WBGene00086566	C08H9.16	17.8669	14.3106	23.7754	0.245366	185
WBGene00015624	C09B8.5	29.5279	18.8572	68.0161	0.577779	157.667
WBGene00015638	C09E7.4	19.6344	17.0092	23.2178	0.12604	166.667
WBGene00015641	C09E7.7	29.4821	26.2576	33.6093	0.0688989	151.333
WBGene00015644	C09E8.1	42.8252	29.5001	78.1048	0.374141	76.3333
WBGene00007492	C09G9.1	24.664	19.4423	33.7206	0.233382	82.3333
WBGene00007499	C09H10.5	36.6406	31.1208	44.5406	0.136523	128
WBGene00015671	C10B5.3	37.8404	23.564	96.006	0.343492	77.6667
WBGene00015684	C10G8.8	44.0265	28.2903	99.2124	0.66925	123
WBGene00015702	C11D2.4	21.2655	15.4906	33.9055	0.393629	86.3333
WBGene00007528	C11H1.2	51.0258	37.8281	78.3667	0.197025	112
WBGene00007531	C11H1.7	76.9302	55.9816	122.932	0.213961	621.333
WBGene00007548	C13C4.4	28.2918	21.3145	42.0604	0.330401	216.333
WBGene00015740	C13E3.1	54.398	32.488	167.072	0.445308	52
WBGene00015746	C13F10.7	72.4581	48.0689	147.088	0.455423	673.333
WBGene00015747	C13G5.2	22.5822	18.5381	28.8829	0.18767	72
WBGene00015748	C14A11.2	38.6265	23.8943	100.736	0.282505	70
WBGene00050944	C14A11.9	49.3148	30.2943	132.516	0.568705	217.333
WBGene00007573	C14B1.2	23.221	18.7169	30.5799	0.217025	219.667
WBGene00007574	C14B1.3	31.3019	22.1753	53.1948	0.188474	119.333
WBGene00007579	C14B1.8	28.3053	22.188	39.0799	0.272342	447
WBGene00015752	C14B9.2	104.985	67.6794	233.926	0.436259	7024.67
WBGene00015754	C14B9.8	30.1451	25.5873	36.6786	0.148682	262.667
WBGene00007588	C14C10.5	22.6566	19.1306	27.776	0.143583	129
WBGene00015769	C14C11.7	41.3237	29.2303	70.4857	0.427137	310
WBGene00007592	C14H10.2	92.1874	61.0159	188.474	0.300675	801.333
WBGene00007602	C15C6.3	24.5623	20.6793	30.2405	0.173819	346
WBGene00007606	C15C8.4	45.491	33.0675	72.8676	0.412626	141.333
WBGene00015800	C15H9.4	31.7437	23.513	48.8403	0.216578	122.667
WBGene00015801	C15H9.5	47.3258	37.0256	65.5653	0.298968	179.667
WBGene00015815	C16A11.2	27.3598	20.8894	39.637	0.325357	79.3333
WBGene00015810	C16A3.5	81.9936	60.562	126.901	0.354014	485
WBGene00015824	C16B8.4	18.1002	13.1435	29.0589	0.397585	98
WBGene00007623	C16C10.2	46.9004	33.3103	79.2217	0.307096	172
WBGene00007625	C16C10.4	47.3398	31.6081	94.2484	0.4436	1439.67
WBGene00007628	C16C10.8	63.0476	47.2073	94.8865	0.195021	266
WBGene00015866	C16E9.2	54.0706	30.541	235.528	0.242788	86.3333
WBGene00015868	C16H3.3	117.653	80.6372	217.492	0.220411	1003.33
WBGene00044236	C17E4.11	28.9012	20.7149	47.7857	0.22592	83.6667
WBGene00219313	C17E4.20	69.7881	59.8823	83.6209	0.137775	4066.33
WBGene00007645	C17E4.6	25.7202	20.7466	33.8306	0.272523	639
WBGene00015915	C17G10.1	26.8585	19.0499	45.5153	0.473025	63.3333
WBGene00015922	C17H11.2	25.6501	19.4053	37.8212	0.278847	85.6667
WBGene00015926	C17H11.6	70.7366	51.4401	113.201	0.25198	274.333
WBGene00015928	C17H12.2	65.5526	52.319	87.7475	0.120832	169.667
WBGene00015941	C18A3.3	55.1952	39.636	90.8641	0.37301	616.333
WBGene00007666	C18B12.4	18.5383	16.2981	21.4925	0.153358	198.667
WBGene00015955	C18B2.4	21.1342	15.1545	34.9086	0.40763	269
WBGene00015968	C18C4.7	30.8823	22.4502	49.4585	0.343189	390.667
WBGene00007681	C18D11.3	51.504	40.0019	72.2901	0.253821	321.667
WBGene00007675	C18D4.6	30.0618	20.5739	55.7896	0.406658	70.6667
WBGene00015976	C18E3.9	16.916	13.987	21.3967	0.173452	120.667
WBGene00007683	C18E9.2	101.799	69.2852	191.814	0.50452	2271.33
WBGene00007684	C18E9.4	59.066	47.8955	77.032	0.221917	539.333
WBGene00015978	C18F10.7	35.5073	28.0036	48.504	0.269893	78.6667
WBGene00016011	C23G10.2	60.3693	36.854	166.798	0.543787	98.6667
WBGene00016014	C23G10.7	29.1146	22.6494	40.7452	0.266038	118
WBGene00016021	C23H3.5	33.9234	29.3553	40.1753	0.113537	161
WBGene00016022	C23H3.9	87.2949	41.2693	-757.435	0.458858	478
WBGene00007694	C23H4.6	29.781	22.1654	45.3686	0.321797	317.333
WBGene00016055	C24D10.4	26.8557	21.8791	34.7629	0.234896	348.667
WBGene00016057	C24D10.6	33.277	28.0924	40.8083	0.15369	338
WBGene00007697	C24F3.2	19.524	13.7302	33.7771	0.530981	117.333
WBGene00016068	C24H10.2	33.0268	21	77.2929	0.520704	99.6667
WBGene00016071	C24H12.1	30.063	23.5333	41.6077	0.243524	510.333
WBGene00016073	C24H12.4	124.211	105.033	151.957	0.0882917	731.333
WBGene00007705	C25A1.1	63.093	48.6378	89.7741	0.2512	336.667
WBGene00077526	C25A1.16	102.219	80.3593	140.415	0.201259	1144
WBGene00016102	C25F6.1	73.0599	54.129	112.354	0.279788	178.333
WBGene00007730	C25G4.2	70.9744	40.924	267.121	0.392978	95
WBGene00016120	C25H3.11	46.8227	29.7893	109.347	0.517832	287
WBGene00016118	C25H3.9	98.224	78.4732	131.261	0.0893849	956.333
WBGene00016129	C26B2.7	29.5674	24.0154	38.4584	0.170253	181.667
WBGene00016131	C26B9.1	30.1389	25.5978	36.6386	0.154421	145.333
WBGene00016135	C26B9.6	34.4776	26.28	50.1076	0.279675	59.3333
WBGene00016148	C26F1.3	23.3039	18.3867	31.8116	0.272803	114
WBGene00007771	C27C12.1	13.4568	9.77457	21.5901	0.482909	94.6667
WBGene00007774	C27C12.4	53.6412	40.274	80.2901	0.281169	304.333
WBGene00016171	C27F2.10	29.9597	22.9553	43.1157	0.194619	165.667
WBGene00016166	C27F2.4	42.7431	35.1844	54.4382	0.145232	180.667
WBGene00043156	C27F2.9	30.121	23.1952	42.9434	0.22103	238
WBGene00007787	C27H6.8	47.7498	33.5802	82.6068	0.422115	160.667
WBGene00016194	C28H8.3	55.3997	38.7753	96.9775	0.242076	307.667
WBGene00016208	C29E4.11	24.0533	17.9602	36.4034	0.279604	135
WBGene00016209	C29E4.12	27.2224	20.7602	39.5261	0.322532	671.667
WBGene00043051	C29E4.13	29.5495	21.0749	49.4234	0.464779	135.333
WBGene00016235	C29H12.2	43.7197	34.1159	60.8491	0.189509	312.333
WBGene00016244	C30B5.2	33.014	26.5294	43.6942	0.250798	750.333
WBGene00022951	C30E1.9	61.6467	45.7591	94.4347	0.263295	7521
WBGene00007826	C30H6.9	30.5896	24.5035	40.6982	0.244106	162.333
WBGene00007846	C31E10.5	43.8591	32.3447	68.1031	0.261537	235
WBGene00007847	C31E10.6	44.4875	32.6538	69.773	0.3252	191
WBGene00016308	C32B5.15	19.8324	15.6124	27.1791	0.291337	91.3333
WBGene00016299	C32B5.6	34.1739	23.0716	65.872	0.348741	71.6667
WBGene00016317	C32D5.10	24.1506	18.8642	33.5535	0.368313	135
WBGene00016318	C32D5.11	37.6537	23.2244	99.4289	0.505983	212
WBGene00016316	C32D5.8	79.8939	53.6457	156.437	0.30027	299
WBGene00016333	C32F10.8	53.0547	39.3794	81.2811	0.300594	143
WBGene00007878	C33A11.2	21.4343	16.2359	31.5295	0.291719	198
WBGene00007880	C33A12.1	93.1747	69.8537	139.871	0.329244	1233.33
WBGene00007882	C33A12.3	41.1962	32.2124	57.129	0.232649	333.667
WBGene00194651	C33D9.13	38.7555	31.0682	51.4976	0.164492	1294
WBGene00007899	C33D9.5	45.2839	33.8386	68.4284	0.25173	332
WBGene00007900	C33D9.6	29.6099	21.3067	48.5167	0.400308	604
WBGene00007902	C33D9.9	46.2209	28.5028	122.156	0.644038	90.3333
WBGene00016345	C33E10.1	19.866	15.5506	27.4966	0.142702	102.667
WBGene00023245	C33E10.3	56.0047	35.0731	138.9	0.836257	174
WBGene00050941	C33F10.14	60.0867	39.5668	124.821	0.269476	120.333
WBGene00016393	C34B2.8	131.52	85.4008	285.937	0.234676	1636.33
WBGene00007907	C34B4.2	26.5052	20.5244	37.4051	0.196343	48.3333
WBGene00007921	C34C12.2	29.6073	24.7079	36.9304	0.203478	476.333
WBGene00007923	C34C12.4	34.9127	23.5751	67.2581	0.448863	77.6667
WBGene00016406	C34D10.1	20.0711	15.7467	27.6699	0.298288	83.3333
WBGene00016400	C34D4.4	41.5779	29.7288	69.1322	0.324721	543.667
WBGene00016411	C34E10.10	46.1555	31.2233	88.4609	0.432598	388.667
WBGene00007944	C34F6.10	36.9756	28.0761	54.1354	0.291494	163.333
WBGene00007943	C34F6.9	36.2448	28.1543	50.8599	0.291641	159
WBGene00016429	C35A11.2	33.4986	26.5866	45.2674	0.162959	136.667
WBGene00007952	C35A5.8	69.8924	55.9675	93.0413	0.165256	460
WBGene00016432	C35B1.2	31.4311	22.4072	52.6237	0.307551	189
WBGene00016435	C35B1.5	91.1853	62.1962	170.788	0.263745	516.333
WBGene00016439	C35D10.1	39.6818	31.6788	53.0952	0.271986	337
WBGene00016446	C35D10.10	56.5012	43.4664	80.7025	0.134343	415
WBGene00016442	C35D10.5	29.2891	22.3244	42.5697	0.277554	98.6667
WBGene00016444	C35D10.7	31.2674	22.3447	52.0531	0.26943	85.3333
WBGene00016456	C35E7.4	50.2505	42.2298	62.0322	0.167328	252
WBGene00016457	C35E7.5	65.7708	51.9789	89.5249	0.160177	6429
WBGene00016458	C35E7.6	78.1378	69.1825	89.7562	0.0332956	1495.67
WBGene00007970	C36A4.10	39.5488	27.5635	69.9765	0.308457	129.333
WBGene00007978	C36B1.11	34.347	26.4934	48.8187	0.311808	108.333
WBGene00044614	C36B1.14	45.4381	34.3928	66.9342	0.229474	198.667
WBGene00007976	C36B1.9	38.7646	26.1366	75.0023	0.455401	90.3333
WBGene00016490	C36E6.2	30.9964	26.848	36.6611	0.148371	348
WBGene00007983	C36E8.4	28.9426	20.0927	51.7248	0.395354	86.3333
WBGene00016492	C37A2.6	75.3447	50.5229	148.111	0.403407	65
WBGene00016511	C37H5.13	38.7482	31.7739	49.6451	0.192885	684
WBGene00016508	C37H5.5	80.5887	54.1193	157.736	0.362439	659.333
WBGene00008019	C38H2.2	20.1892	16.6218	25.7063	0.228746	96.6667
WBGene00016520	C39B5.2	24.6409	18.6755	36.2058	0.332433	1023.67
WBGene00008035	C39E9.12	20.6447	15.7401	29.9896	0.347664	738.667
WBGene00016545	C40A11.2	23.8036	19.8042	29.827	0.206143	410.667
WBGene00016547	C40A11.4	61.2684	41.3256	118.41	0.341738	784.333
WBGene00016549	C40A11.6	31.0862	24.2378	43.3288	0.293076	888
WBGene00016562	C41D11.3	27.5051	22.337	35.7847	0.227649	357
WBGene00016567	C41D11.9	40.2139	35.4567	46.4455	0.0834005	102
WBGene00016590	C42C1.12	19.627	14.3152	31.2066	0.384209	143.667
WBGene00016591	C42C1.13	32.9264	22.1957	63.7442	0.422274	89.6667
WBGene00008070	C43D7.8	123.686	53.4621	-394.509	0.572633	97
WBGene00016607	C43E11.9	32.8061	22.0146	64.3508	0.478097	283.333
WBGene00016617	C43H6.4	31.745	25.7261	41.4406	0.272279	350.667
WBGene00016631	C44B7.11	47.9875	42.027	55.9182	0.0480051	179
WBGene00016629	C44B7.7	34.7795	27.4541	47.4367	0.206197	120.333
WBGene00016641	C44C1.1	50.1951	33.7063	98.2657	0.467114	106
WBGene00008094	C44H4.4	51.7035	41.3411	68.9985	0.103715	269.667
WBGene00045379	C45B11.6	34.2186	27.888	44.2674	0.230542	1365.33
WBGene00016661	C45B2.6	40.6487	33.9269	50.6924	0.0591025	162.333
WBGene00016671	C45G7.4	17.0257	14.199	21.2576	0.152771	111.333
WBGene00016674	C45G9.2	21.054	16.8247	28.1236	0.271186	183.667
WBGene00016676	C45G9.5	26.239	21.3893	33.9325	0.160343	124
WBGene00016706	C46C11.3	116.681	61.787	1045.85	0.314562	234.667
WBGene00044567	C46C11.4	42.482	30.0996	72.172	0.341173	225.667
WBGene00008110	C46C2.2	71.9159	43.6794	203.409	0.0441669	97.6667
WBGene00008119	C46F11.4	33.0293	28.9638	38.4225	0.0760666	344
WBGene00008120	C46F11.5	36.2407	27.3226	53.8016	0.27209	170
WBGene00008121	C46F11.6	38.1425	30.9773	49.62	0.262453	539
WBGene00016725	C46H3.2	22.4941	17.0191	33.1625	0.332347	251.667
WBGene00008131	C47B2.2	44.6947	33.5262	67.021	0.253199	96.6667
WBGene00008136	C47D12.2	42.3051	32.1052	62.004	0.226899	400.667
WBGene00008138	C47D12.4	31.6898	23.2887	49.5725	0.380089	1261.67
WBGene00008147	C47E12.2	29.9363	23.2348	42.0703	0.256246	204.667
WBGene00008143	C47E8.4	25.6288	20.0238	35.5915	0.279509	455
WBGene00008164	C47G2.3	46.0077	29.6229	102.951	0.62554	120.333
WBGene00008165	C47G2.4	61.9058	44.5333	101.501	0.298394	499.667
WBGene00016740	C48B6.2	29.9662	24.9869	37.4239	0.154812	154.333
WBGene00016741	C48B6.3	29.462	21.8514	45.2069	0.292592	178
WBGene00008177	C48D1.1	46.4438	32.9946	78.4018	0.321184	66.6667
WBGene00008204	C49C3.15	20.6366	16.095	28.749	0.30122	65.3333
WBGene00008198	C49C3.8	36.7556	32.1796	42.8487	0.109756	337
WBGene00016790	C49H3.3	64.8747	40.8484	157.532	0.568316	1322.67
WBGene00016792	C49H3.6	20.5316	14.5132	35.0778	0.471576	397.667
WBGene00008219	C50B6.3	27.7611	20.9173	41.2612	0.362551	401
WBGene00008222	C50B6.9	50.0926	32.9499	104.417	0.126403	72.6667
WBGene00008226	C50B8.4	52.3074	40.2096	74.8174	0.0455171	307.667
WBGene00044420	C50D2.10	32.8975	23.7226	53.6453	0.353258	117
WBGene00016810	C50D2.7	50.4578	36.9645	79.4656	0.353332	167
WBGene00016836	C50F2.2	26.0925	19.9753	37.6104	0.332545	322.333
WBGene00008232	C50F4.4	29.9624	18.7807	74.0508	0.5739	102
WBGene00001910	C50F4.6	30.4975	20.4334	60.0975	0.536345	4149.67
WBGene00008255	C51E3.10	25.8217	17.5278	49.015	0.442498	99
WBGene00016867	C52B9.4	65.3569	59.1588	73.0058	0.0714034	387.667
WBGene00194707	C53A5.17	26.6303	18.0608	50.6745	0.477814	59.6667
WBGene00008266	C53A5.6	52.4946	42.8093	67.844	0.222476	191.667
WBGene00008273	C53B4.3	32.1694	24.5886	46.5082	0.332007	105
WBGene00044770	C53C11.5	42.8221	30.8376	70.0432	0.43724	309.667
WBGene00016906	C53D5.5	36.0164	28.7994	48.06	0.17063	267.333
WBGene00008281	C53D6.4	17.409	14.4763	21.8319	0.198775	161.333
WBGene00008283	C53D6.6	48.1147	36.6202	70.1263	0.215573	213.333
WBGene00044746	C53H9.3	25.4368	15.2623	76.3054	0.536542	92
WBGene00008288	C54C6.6	57.4594	37.0457	127.984	0.330626	79
WBGene00008310	C54E10.6	32.2979	25.5757	43.8137	0.237864	102.667
WBGene00016919	C54E4.4	23.9206	18.0241	35.5508	0.381706	162
WBGene00008318	C54G4.9	39.6798	30.6073	56.3967	0.19945	62.3333
WBGene00008330	C55A6.1	15.4034	12.7912	19.3564	0.203939	141
WBGene00008339	C55A6.10	27.426	23.5252	32.8774	0.0862409	185
WBGene00008344	C56A3.5	43.7733	31.6543	70.929	0.282856	174
WBGene00016970	C56E6.2	17.0118	12.7087	25.7205	0.350286	114.333
WBGene00016983	C56G2.15	28.1333	20.771	43.5801	0.346105	349.333
WBGene00016978	C56G2.3	23.8146	17.4984	37.2658	0.298505	57.3333
WBGene00016979	C56G2.4	48.8322	30.4656	122.962	0.509841	103.333
WBGene00012230	cacn-1	35.8887	26.6677	54.8566	0.368027	623.333
WBGene00006861	cal-5	45.227	29.6459	95.3295	0.249174	79
WBGene00007119	calf-1	82.9855	43.3951	946.515	0.248827	129
WBGene00009260	calm-1	18.1799	12.8074	31.3168	0.477919	156.333
WBGene00019760	calu-1	142.291	85.8133	416.234	0.695415	5202.33
WBGene00017240	calu-2	42.1297	35.5377	51.7242	0.18879	482
WBGene00000289	cam-1	35.1324	28.3617	46.1496	0.226328	983.667
WBGene00020251	camt-1	25.9333	22.5398	30.5297	0.0753405	53
WBGene00013606	cand-1	56.9262	42.1482	87.6625	0.173141	436
WBGene00019641	cank-26	52.496	33.7795	117.724	0.127834	148
WBGene00000293	cap-2	109.628	81.1932	168.715	0.189107	1635.67
WBGene00009254	capg-1	64.7106	45.3005	113.225	0.236604	908
WBGene00010093	capg-2	38.2083	29.5612	54.0059	0.331921	477.333
WBGene00012484	car-1	109.102	77.9066	181.965	0.242468	663.333
WBGene00000801	cars-2	83.7147	44.0349	846.424	0.39054	128.667
WBGene00000294	cas-1	57.2721	39.7603	102.351	0.353913	977.667
WBGene00012343	casc-3	104.033	64.4764	269.172	0.311021	953
WBGene00010631	cash-1	34.3801	30.4455	39.4826	0.0615285	620.333
WBGene00012341	catp-6	50.4018	35.5036	86.8435	0.35777	128
WBGene00007514	catp-8	91.2172	63.6647	160.813	0.172281	742.667
WBGene00000301	cav-1	71.5611	43.7853	195.717	0.471802	36655
WBGene00000366	cbp-1	33.7684	27.124	44.724	0.24209	2524.67
WBGene00003085	ccar-1	63.9248	44.8153	111.446	0.289654	3190
WBGene00000368	ccb-1	41.2002	26.8674	88.3109	0.353154	153.333
WBGene00013042	cccp-1	42.1459	27.2187	93.3291	0.241758	51.3333
WBGene00014204	ccdc-47	139.786	84.2473	410.215	0.405169	1343.67
WBGene00007627	ccdc-55	38.3865	33.6551	44.6659	0.0991842	306.333
WBGene00021643	ccep-290	85.6022	40.7521	-851.268	0.255013	111
WBGene00000369	ccf-1	43.3583	32.2614	66.0918	0.31365	613
WBGene00011527	cchl-1	40.2291	29.7103	62.2786	0.279533	192.333
WBGene00007561	ccm-3	48.6798	37.4589	69.4982	0.170559	386.667
WBGene00009650	ccnk-1	24.9505	20.9971	30.7379	0.199857	340.667
WBGene00000376	ccr-4	57.5198	47.6588	72.5258	0.0874228	655.333
WBGene00000377	cct-1	69.1622	50.8653	108.017	0.240567	479.667
WBGene00000378	cct-2	73.629	52.9395	120.865	0.296906	651.333
WBGene00018782	cct-3	106.529	54.0216	3800.73	0.580323	213
WBGene00000379	cct-4	56.579	44.3956	77.9784	0.271021	689.333
WBGene00000380	cct-5	117.677	87.0991	181.341	0.28264	1374
WBGene00000381	cct-6	49.6431	34.7473	86.893	0.382149	442.333
WBGene00020391	cct-7	73.1111	62.0441	88.9833	0.194731	716
WBGene00021934	cct-8	70.2979	46.3138	145.804	0.540204	140.667
WBGene00010283	ccz-1	26.6094	19.6565	41.173	0.342995	97.3333
WBGene00021549	cdap-2	32.7532	27.3566	40.8021	0.160822	65.3333
WBGene00000383	cdc-14	54.958	43.3062	75.1876	0.204241	792
WBGene00000386	cdc-25.1	50.3719	37.2001	77.9849	0.253555	75.6667
WBGene00000387	cdc-25.2	20.1906	15.6209	28.5397	0.30342	667.333
WBGene00015235	cdc-26	30.9325	24.3544	42.3791	0.2689	197.667
WBGene00021097	cdc-37	69.0197	56.2311	89.3379	0.235077	592
WBGene00000390	cdc-42	49.3429	45.1144	54.4459	0.0260209	935.667
WBGene00007352	cdc-48.1	36.8589	28.1968	53.2027	0.279105	542.667
WBGene00008053	cdc-48.2	39.0873	32.0454	50.0958	0.164376	431.333
WBGene00010562	cdc-48.3	38.7281	34.0249	44.94	0.137955	83
WBGene00008386	cdc-5L	61.6725	46.3116	92.2809	0.238585	1123.33
WBGene00000382	cdc-6	35.3998	23.2695	73.9493	0.46773	218.667
WBGene00016421	cdc-7	17.8043	11.9564	34.8492	0.515844	79
WBGene00018064	cdc-73	35.561	27.2365	51.2137	0.270431	480
WBGene00000393	cdf-1	48.4066	38.3076	65.7367	0.134636	210.333
WBGene00016384	cdgs-1	49.7065	36.9413	75.9521	0.206014	130.333
WBGene00019994	cdh-1	56.1171	40.5635	91.0158	0.398699	137
WBGene00000395	cdh-3	58.1708	36.8265	138.366	0.522383	474
WBGene00000396	cdh-4	65.2822	48.6866	99.0422	0.20972	3225.33
WBGene00000397	cdh-5	60.5362	36.663	173.532	0.466611	383
WBGene00017576	cdh-8	84.1965	60.7001	137.372	0.27916	472.667
WBGene00000401	cdh-9	38.895	31.7059	50.3004	0.20829	184.667
WBGene00000405	cdk-1	45.5547	33.3215	71.9805	0.356682	1620.33
WBGene00015203	cdk-11.1	28.0097	20.9503	42.2443	0.274619	345.333
WBGene00013917	cdk-11.2	27.9167	25.1433	31.3777	0.0858538	180
WBGene00007135	cdk-12	37.0425	29.8459	48.8123	0.260749	300
WBGene00019362	cdk-2	66.5577	46.2508	118.654	0.309332	169
WBGene00000406	cdk-4	24.9809	17.316	44.8202	0.415491	374.333
WBGene00000407	cdk-5	23.5507	16.7993	39.375	0.321135	202.667
WBGene00000408	cdk-7	40.5898	31.1126	58.3698	0.304442	650.333
WBGene00000409	cdk-8	39.8665	31.5814	54.0447	0.162234	554.667
WBGene00000410	cdk-9	42.8194	27.7434	93.7806	0.443973	253.667
WBGene00013765	cdkr-3	40.8561	27.2116	81.9451	0.335659	269
WBGene00000411	cdl-1	58.7612	41.8785	98.4495	0.333417	3653
WBGene00010471	cdr-6	75.5356	49.2036	162.5	0.397955	71.3333
WBGene00000413	cdt-1	100.44	79.5817	136.115	0.255829	955
WBGene00011318	cdt-2	24.0615	19.0915	32.5297	0.275974	113
WBGene00000414	cec-1	140.256	93.1834	283.441	0.318153	5429.67
WBGene00022831	cec-10	27.4743	21.3027	38.6801	0.248041	156.333
WBGene00011636	cec-3	44.1025	26.8131	124.168	0.529087	667.333
WBGene00017990	cec-4	37.0013	31.7991	44.2385	0.181546	1280.67
WBGene00017993	cec-5	83.9781	60.5175	137.144	0.236907	5650
WBGene00020463	cec-6	26.6663	21.0579	36.3466	0.230457	79.6667
WBGene00012551	cec-7	30.6793	23.6504	43.6532	0.309991	117
WBGene00021913	cec-8	54.5967	41.9666	78.1019	0.187866	1335.33
WBGene00000415	ced-1	38.845	30.9666	52.0999	0.129975	322
WBGene00000424	ced-10	70.7421	46.1316	151.639	0.222943	221
WBGene00000425	ced-11	55.699	39.6049	93.8272	0.373495	307.667
WBGene00000426	ced-12	42.8401	33.5406	59.2748	0.265264	161.667
WBGene00000416	ced-2	28.3729	23.0159	36.9802	0.246363	151
WBGene00000417	ced-3	31.0186	24.6452	41.8383	0.167623	150.333
WBGene00000418	ced-4	39.9344	32.0959	52.8387	0.0753129	255.333
WBGene00000419	ced-5	37.66	31.8464	46.0702	0.0309389	344.333
WBGene00000420	ced-6	19.2746	16.3293	23.5162	0.164358	213
WBGene00000421	ced-7	43.0323	34.1649	58.1163	0.12784	341.333
WBGene00000422	ced-8	22.5279	18.6996	28.3271	0.218995	403.667
WBGene00012584	ceh-100	72.3733	53.1408	113.423	0.147059	820
WBGene00000437	ceh-13	27.5309	20.139	43.4957	0.321813	425.333
WBGene00000429	ceh-2	50.7513	31.0593	138.671	0.693254	491.333
WBGene00000443	ceh-20	24.8248	19.0184	35.7346	0.29764	1090.67
WBGene00000444	ceh-21	21.0636	14.3279	39.7507	0.374814	65.3333
WBGene00000445	ceh-22	35.9667	27.2171	53.0073	0.145009	1023.33
WBGene00000449	ceh-27	26.6342	19.9665	39.988	0.355595	1715
WBGene00000451	ceh-30	18.949	13.0085	34.8756	0.509171	104.333
WBGene00000453	ceh-32	23.8939	19.1535	31.7526	0.21014	1328.33
WBGene00000455	ceh-34	40.37	28.4031	69.7627	0.362384	2626.67
WBGene00000457	ceh-36	33.5698	22.8884	62.9438	0.480603	1273
WBGene00000458	ceh-37	63.6526	45.4411	106.224	0.211749	244
WBGene00000459	ceh-38	25.9199	21.1442	33.4824	0.229621	542.667
WBGene00000461	ceh-40	21.0743	16.8017	28.2608	0.271985	189.333
WBGene00000464	ceh-44	52.7584	42.0615	70.7519	0.119443	519
WBGene00022837	ceh-45	21.0424	14.2081	40.5454	0.473729	711.333
WBGene00015934	ceh-48	54.785	31.5624	207.338	0.347146	180.667
WBGene00015651	ceh-53	35.6153	25.3253	59.99	0.401001	857.667
WBGene00007417	ceh-58	32.5226	24.4575	48.5236	0.333373	442.333
WBGene00000431	ceh-6	26.7787	20.7774	37.655	0.277262	191
WBGene00017690	ceh-60	36.7891	25.3502	67.0403	0.286361	164.667
WBGene00013876	ceh-74	15.8953	12.7096	21.2124	0.255146	100.333
WBGene00000433	ceh-8	62.781	39.1545	158.304	0.563712	120.667
WBGene00018355	ceh-86	39.2701	31.5953	51.8698	0.231548	660
WBGene00008195	ceh-88	19.071	14.362	28.3744	0.392343	62.6667
WBGene00019864	ceh-93	21.8354	16.3737	32.7647	0.437624	131
WBGene00000466	cel-1	40.4373	32.3246	53.9868	0.236752	607.667
WBGene00000467	cep-1	13.4402	10.9098	17.4988	0.285354	71
WBGene00000468	ces-1	18.3311	13.0008	31.0695	0.436049	220.667
WBGene00000469	ces-2	56.0506	46.4578	70.6356	0.15868	2645
WBGene00019477	cest-17	66.5802	56.9112	80.2073	0.119587	4467
WBGene00000472	cey-1	205.311	121.803	653.018	0.550219	8664.67
WBGene00000475	cey-4	176.781	121.823	322.082	0.236289	4057.67
WBGene00000476	cfi-1	25.3044	20.9632	31.9133	0.240318	191
WBGene00009668	cfim-1	46.0482	34.4966	69.2309	0.309882	515.667
WBGene00008362	cfim-2	99.197	72.0523	159.157	0.175868	631
WBGene00009924	cfp-1	35.2306	28.78	45.4083	0.215087	167.667
WBGene00000478	cfz-2	18.1175	14.3961	24.4336	0.251916	689
WBGene00006496	cgef-1	26.1073	19.6839	38.7541	0.325343	228.333
WBGene00000479	cgh-1	52.4374	39.4677	78.1037	0.243931	378.667
WBGene00000480	cgp-1	68.1293	47.3422	121.46	0.429555	188.333
WBGene00019127	cgt-3	28.5989	22.3487	39.7022	0.250335	111.667
WBGene00011532	chaf-1	54.8573	39.0822	91.9866	0.288064	1318.67
WBGene00022141	chaf-2	24.6316	21.1759	29.435	0.19013	264
WBGene00019946	chat-1	46.2693	36.5848	62.9268	0.231068	580.667
WBGene00011867	chc-1	76.5702	55.7325	122.295	0.299604	926.333
WBGene00010942	chch-3	77.3299	53.1038	142.203	0.373316	717
WBGene00010369	chd-1	38.1437	32.1602	46.8627	0.149395	811.333
WBGene00000482	chd-3	61.7786	45.1054	98.0068	0.274979	2472.67
WBGene00007053	chd-7	61.2508	37.4767	167.521	0.415951	3755
WBGene00015687	chdp-1	96.3453	80.9242	119.027	0.133301	7720
WBGene00018051	che-10	71.9498	41.7484	260.135	0.413436	225
WBGene00015267	chin-1	38.1772	27.9163	60.3653	0.237973	141.333
WBGene00000498	chk-1	31.0824	24.4828	42.5529	0.22198	316.667
WBGene00011976	chmp-7	24.3267	18.1172	37.0121	0.327601	483
WBGene00000500	chn-1	30.6352	22.1851	49.4827	0.369743	347.667
WBGene00018037	chtl-1	22.405	16.7152	33.9674	0.342852	92.6667
WBGene00012479	ciao-1	44.1095	30.2252	81.5876	0.222933	100
WBGene00000506	cic-1	30.682	24.0874	42.2487	0.283309	333
WBGene00019629	cid-1	104.292	65.1526	261.214	0.207076	164.333
WBGene00015347	cids-1	21.8045	18.8536	25.8504	0.140119	267
WBGene00009451	cids-2	58.6376	48.1781	74.8978	0.205428	1032
WBGene00019543	cif-1	63.9702	49.8642	89.2054	0.218439	360.667
WBGene00018892	cir-1	54.2264	41.479	78.2851	0.236334	1361.33
WBGene00044026	cisd-1	45.3228	28.4811	110.904	0.378194	157.333
WBGene00010909	cisd-3.1	35.239	30.4697	41.7784	0.10709	211
WBGene00022053	cisd-3.2	55.1094	45.7932	69.1841	0.183666	147.333
WBGene00000507	cit-1.1	31.761	23.6438	48.3654	0.298846	176
WBGene00000508	cit-1.2	24.1999	20.4178	29.7017	0.144159	213
WBGene00000512	ckb-2	34.5932	28.9466	42.9767	0.147839	134.667
WBGene00000514	ckb-4	28.5636	21.8053	41.3929	0.270456	137.667
WBGene00000516	cki-1	14.1461	10.8149	20.4431	0.350835	1451.33
WBGene00001051	cks-1	108.82	78.9428	175.082	0.326692	2834.33
WBGene00000519	cku-70	24.3824	16.6173	45.7709	0.443821	82.3333
WBGene00000520	cku-80	49.2302	38.2846	68.9404	0.258904	237
WBGene00000521	cky-1	22.6691	16.6451	35.5261	0.310731	54.6667
WBGene00000527	cle-1	30.7802	18.5456	90.4516	0.817707	58.6667
WBGene00020220	clec-140	56.0689	40.9914	88.6916	0.315636	1434
WBGene00018547	clec-78	62.3684	38.6909	160.729	0.584286	653
WBGene00000532	clh-5	43.5259	35.6606	55.8425	0.218495	309.667
WBGene00020246	clic-1	151.577	91.4246	443.138	0.643872	1666.33
WBGene00019361	clik-3	51.8841	38.7579	78.4545	0.217469	99.6667
WBGene00000536	clk-1	66.9707	36.6747	385.049	0.495075	56.6667
WBGene00000542	clp-1	60.4357	38.6749	138.19	0.13447	68.6667
WBGene00000543	clp-2	23.8119	19.6359	30.244	0.192735	95
WBGene00000548	clr-1	37.699	33.6257	42.8952	0.1035	759
WBGene00000549	cls-2	31.691	28.4815	35.7158	0.075382	236.667
WBGene00013847	cls-3	38.5008	31.3932	49.7688	0.191625	208.667
WBGene00009127	clsp-1	34.7242	27.4557	47.2267	0.235524	907
WBGene00000550	clu-1	52.6914	37.7366	87.2797	0.268336	436
WBGene00016564	cmt-1	22.09	16.6688	32.737	0.340369	318.667
WBGene00000554	cnb-1	69.3682	43.5499	170.372	0.32259	121
WBGene00000561	cnd-1	13.0672	10.2507	18.018	0.207619	250
WBGene00018474	cnep-1	35.4714	27.8645	48.7913	0.150558	242.667
WBGene00011648	cni-1	56.4242	39.1982	100.66	0.26142	267
WBGene00000564	cnk-1	38.6358	30.4924	52.7138	0.291017	190.667
WBGene00016879	cnnm-1	32.2126	26.359	41.4083	0.203047	112.333
WBGene00000566	cnt-2	19.6281	15.1172	27.976	0.3242	1288
WBGene00000567	cnx-1	78.0223	63.6404	100.803	0.130493	1529.67
WBGene00018046	coa-3	40.963	34.2531	50.9422	0.121993	244.333
WBGene00012483	coa-5	26.4631	24.0067	29.4795	0.00786146	189.667
WBGene00013893	coa-6	26.3453	18.6255	44.9941	0.293667	95
WBGene00003258	cogc-1	26.8966	22.3523	33.7601	0.105319	77
WBGene00000585	cogc-2	24.9285	20.7041	31.3186	0.202215	357.333
WBGene00022121	cogc-3	28.9751	17.6618	80.6102	0.459864	67
WBGene00016608	cogc-5	45.362	35.6187	62.4428	0.23069	138.667
WBGene00019481	cogc-6	34.0076	29.979	39.287	0.146022	557.333
WBGene00019820	cogc-8	48.0261	36.8304	69.0011	0.19287	365.667
WBGene00000591	coh-1	50.0554	39.8778	67.2082	0.169378	915.667
WBGene00000674	col-99	48.7499	32.2761	99.5707	0.421956	164
WBGene00008082	com-1	16.9752	13.0318	24.3407	0.34158	93
WBGene00022119	copa-1	78.9761	58.3462	122.174	0.238827	714
WBGene00021292	copb-1	46.1715	35.8322	64.8976	0.217838	465
WBGene00009542	copb-2	66.3009	53.1385	88.1307	0.139459	398.667
WBGene00015734	copd-1	57.6899	43.4045	85.9919	0.281263	849.333
WBGene00009732	cope-1	67.7334	47.8443	115.923	0.363984	2012
WBGene00000763	coq-3	30.0311	20.1837	58.6419	0.546463	279
WBGene00000764	coq-4	47.5852	29.515	122.718	0.313024	55.6667
WBGene00000765	coq-5	22.1815	17.8425	29.3089	0.252106	121
WBGene00000766	coq-6	43.3093	34.2859	58.7789	0.164802	71.6667
WBGene00011526	cox-15	53.2221	31.9492	159.27	0.426736	98
WBGene00012354	cox-4	135.451	98.0335	219.062	0.225034	3113.33
WBGene00012553	cox-5A	165.593	103.794	409.281	0.408536	3667.33
WBGene00000371	cox-5B	150.726	96.0335	350.134	0.663263	4107
WBGene00006519	cox-6A	105.595	70.5041	210.23	0.49319	2158.67
WBGene00009161	cox-7C	100.952	57.7876	398.954	0.605024	2034.67
WBGene00019074	cpd-1	36.4206	26.222	59.6017	0.321101	157
WBGene00000773	cpf-1	32.9295	25.4608	46.5988	0.286376	989.333
WBGene00000774	cpf-2	38.9687	25.7869	79.7202	0.410119	805.667
WBGene00000777	cpn-1	62.3626	46.1692	96.0515	0.193997	236.333
WBGene00022301	cpsf-1	35.5363	27.0409	51.815	0.302306	304
WBGene00017313	cpsf-2	53.745	38.7363	87.7408	0.304837	624.333
WBGene00013460	cpsf-3	43.9719	33.1642	65.2288	0.286139	240.667
WBGene00044329	cpsf-4	24.3505	16.0574	50.3589	0.480596	419.333
WBGene00012907	cpt-1	137.842	106.051	196.853	0.205118	1201.33
WBGene00020068	cra-1	39.8615	29.4128	61.8243	0.0915617	147
WBGene00000792	crb-1	60.9613	43.417	102.299	0.31207	492
WBGene00044743	crb-3	41.3709	30.225	65.5395	0.185632	45.3333
WBGene00000793	crh-1	58.1179	36.7204	139.276	0.653147	129.667
WBGene00016162	crh-2	22.3554	19.2978	26.5643	0.106645	356.333
WBGene00019478	cri-2	90.2587	52.0806	338.12	0.430302	104.667
WBGene00010303	cri-3	68.7065	60.0715	80.2406	0.0699625	905.333
WBGene00008624	crld-1	56.8951	46.7005	72.7835	0.157723	1139
WBGene00017763	crls-1	34.3791	28.5676	43.1589	0.136302	139.667
WBGene00010641	crml-1	71.8628	53.7006	108.589	0.196105	219.667
WBGene00000794	crn-1	26.118	19.1431	41.089	0.375754	747.333
WBGene00000795	crn-2	47.7927	35.4801	73.1929	0.288549	65.3333
WBGene00000798	crn-5	24.3495	18.8648	34.3307	0.246559	136
WBGene00012532	crp-1	38.7127	27.0206	68.242	0.132274	194.333
WBGene00000802	crt-1	217.789	151.135	389.619	0.340432	24488.7
WBGene00008403	csa-1	27.0117	17.3265	61.2493	0.423899	87.6667
WBGene00000803	csb-1	18.6075	14.937	24.6695	0.25064	75
WBGene00000804	csc-1	33.803	26.341	47.1637	0.271888	943
WBGene00000812	csk-1	36.5612	31.7627	43.0677	0.140096	306.333
WBGene00000813	csn-1	42.052	32.0446	61.1484	0.0394654	317.667
WBGene00000814	csn-2	44.0239	33.9619	62.5581	0.267942	478.667
WBGene00000817	csn-5	36.4781	24.3556	72.6257	0.408846	487
WBGene00000818	csn-6	33.3125	28.7097	39.6729	0.172849	197.667
WBGene00013709	csnk-1	131.244	101.451	185.811	0.203877	500.333
WBGene00017472	cst-1	62.0707	47.1559	90.7847	0.318628	824.667
WBGene00010962	ctc-3	68.1575	42.2847	175.605	0.590809	11204.3
WBGene00007068	cTel55X.1	94.9811	63.7628	186.092	0.601985	1094.67
WBGene00010676	ctf-18	50.4856	38.7491	72.4208	0.13934	288
WBGene00008921	ctf-4	29.1991	22.4165	41.8667	0.315638	338
WBGene00011915	ctf-8	22.4082	17.7351	30.4248	0.279925	444.333
WBGene00011756	ctg-2	40.7729	32.0112	56.1384	0.228373	208.333
WBGene00000832	ctn-1	136.158	63.6926	-988.541	0.47866	361.333
WBGene00019711	ctnb-1	17.0551	14.1438	21.4755	0.2079	242.667
WBGene00007184	ctr-9	59.0566	47.8946	77.0021	0.169792	1609.33
WBGene00000833	cts-1	100.238	78.5035	138.613	0.16703	1146.33
WBGene00000834	cua-1	39.8153	32.1818	52.196	0.166725	115.667
WBGene00000835	cuc-1	36.6961	23.8368	79.6818	0.4438	448
WBGene00000836	cul-1	35.9287	26.3872	56.2789	0.340284	141.333
WBGene00000837	cul-2	65.3119	47.4964	104.514	0.315634	572.667
WBGene00000839	cul-4	32.0228	27.2942	38.7332	0.133837	410.667
WBGene00000840	cul-5	30.0398	26.5343	34.6126	0.0772918	356
WBGene00013093	cup-14	35.9003	28.6451	48.0772	0.0975679	78.3333
WBGene00000843	cup-2	41.2811	37.0445	46.6119	0.072161	845.333
WBGene00000846	cup-5	46.9575	32.8904	82.0499	0.362895	157.333
WBGene00022025	cus-2	58.1252	45.718	79.7749	0.211299	356.333
WBGene00022702	cutc-1	32.1913	24.2788	47.7546	0.314627	60.6667
WBGene00011443	cutl-11	56.6772	39.0343	103.423	0.202674	138.667
WBGene00021025	cutl-13	67.0481	34.7757	931.424	0.443097	246.333
WBGene00019426	cutl-16	60.5329	45.0966	92.0363	0.0716142	323.333
WBGene00018256	cutl-28	40.8014	35.0169	48.8752	0.130991	389.667
WBGene00017421	cutl-29	83.5866	45.49	514.282	0.142707	123.333
WBGene00008978	cutl-3	33.7624	20.9179	87.4769	0.35184	60
WBGene00011687	cwc-15	31.6306	22.6045	52.6566	0.427708	1131.67
WBGene00017534	cwf-19L1	37.2205	25.2236	70.9803	0.41551	439
WBGene00015156	cwf-19L2	35.0563	30.3892	41.4171	0.139285	191.667
WBGene00000858	cwn-2	40.5875	31.1987	58.0597	0.171433	305.667
WBGene00000863	cya-1	34.3074	29.2203	41.5392	0.17232	1505.67
WBGene00000865	cyb-1	85.2156	62.076	135.858	0.348685	1887
WBGene00000868	cyb-3	136.674	85.6104	338.693	0.60989	4675.33
WBGene00017121	cyc-2.1	160.496	117.495	253.14	0.203271	1887
WBGene00000870	cyd-1	16.7886	12.8334	24.268	0.348545	585
WBGene00000871	cye-1	31.4041	22.4112	52.451	0.374617	173.333
WBGene00021714	cyh-1	78.1537	58.2656	118.655	0.0762447	124.333
WBGene00000872	cyk-1	29.586	25.5016	35.2283	0.153985	508.333
WBGene00000874	cyk-3	53.0675	37.2768	92.0683	0.382689	250.667
WBGene00000875	cyk-4	37.0432	30.5514	47.0382	0.213633	1316.33
WBGene00000876	cyl-1	47.3304	35.9599	69.2166	0.272981	785
WBGene00009594	cyld-1	46.5507	37.8525	60.4391	0.258769	74.3333
WBGene00000877	cyn-1	74.4706	50.4702	141.994	0.265318	598.667
WBGene00000886	cyn-10	30.2475	22.9291	44.4277	0.310263	604.333
WBGene00000887	cyn-11	37.6076	26.5841	64.2494	0.362598	644
WBGene00000888	cyn-12	24.5567	18.3105	37.2705	0.384158	358.667
WBGene00000889	cyn-13	42.0037	34.318	54.1254	0.166926	399.667
WBGene00000891	cyn-15	32.0758	24.6785	45.8061	0.284996	459.333
WBGene00000892	cyn-16	53.0283	32.8442	137.572	0.481011	195.333
WBGene00000880	cyn-4	36.4037	29.0569	48.7231	0.261565	323
WBGene00000882	cyn-6	40.1467	28.7869	66.3163	0.237874	142
WBGene00000883	cyn-7	54.4578	41.1091	80.6438	0.274889	3729.67
WBGene00000884	cyn-8	61.4947	41.8234	116.103	0.463495	1344
WBGene00000374	cyp-31A1	36.0487	23.9625	72.7341	0.327622	70.3333
WBGene00007653	cysl-1	118.427	73.052	312.586	0.732951	217
WBGene00007848	cytb-5.1	74.0424	45.8224	192.746	0.519178	1989
WBGene00020931	cytb-5.2	220.052	136.949	559.664	0.0331875	615.667
WBGene00022697	cyy-1	50.5427	43.512	60.2834	0.0317443	520.333
WBGene00017643	czw-1	33.8072	23.4763	60.3759	0.447558	118
WBGene00017002	D1007.4	20.3246	17.6177	24.0142	0.14444	72.6667
WBGene00017023	D1022.4	56.697	39.1778	102.558	0.421716	963.667
WBGene00017025	D1037.1	37.3203	28.7805	53.0665	0.268089	267
WBGene00017031	D1044.6	38.9576	25.3335	84.285	0.705728	113.667
WBGene00008363	D1046.2	21.6115	17.0805	29.4145	0.176326	133
WBGene00008369	D1053.4	36.6327	32.4183	42.1064	0.0819218	225.333
WBGene00008370	D1054.1	49.621	35.9588	80.026	0.18948	125
WBGene00008371	D1054.3	31.1303	20.4243	65.424	0.542482	124.333
WBGene00017037	D1069.3	43.6122	35.8596	55.6415	0.103189	255.333
WBGene00008398	D2005.3	30.1945	21.1357	52.8427	0.37536	397
WBGene00017053	D2024.5	39.2401	26.1536	78.5384	0.393141	237.333
WBGene00008420	D2030.11	36.9776	24.9253	71.5973	0.584974	427.333
WBGene00008412	D2030.2	33.8294	20.6784	92.9321	0.458669	131
WBGene00008413	D2030.3	30.7532	24.4542	41.4231	0.258989	141.667
WBGene00008414	D2030.4	83.177	55.1084	169.518	0.356935	1044
WBGene00271706	D2089.8	22.0291	15.3213	39.1843	0.540253	232.333
WBGene00018976	daam-1	51.9865	30.344	181.287	0.491402	96
WBGene00000894	dab-1	37.0152	29.4198	49.8972	0.134953	134
WBGene00000896	dad-1	51.474	37.7386	80.929	0.363258	1834.33
WBGene00000897	daf-1	65.5786	52.0224	88.6899	0.160487	206
WBGene00000910	daf-14	14.4521	10.8219	21.7472	0.311516	118
WBGene00000911	daf-15	74.287	47.4651	170.809	0.382146	719.667
WBGene00000912	daf-16	33.6675	28.8542	40.408	0.177253	343.333
WBGene00000913	daf-18	24.0668	20.3216	29.5044	0.165392	216.667
WBGene00000914	daf-19	39.7594	32.1323	52.1344	0.126856	206.667
WBGene00000898	daf-2	70.8223	44.6563	171.044	0.209747	145.333
WBGene00000917	daf-25	38.4778	28.7424	58.1864	0.292872	181
WBGene00000899	daf-3	37.1902	30.8238	46.8709	0.133184	233.667
WBGene00000900	daf-4	29.6074	22.2338	44.2984	0.372401	98.6667
WBGene00022599	daf-41	37.6485	25.8752	69.0806	0.379949	1853.33
WBGene00000901	daf-5	19.5422	15.7649	25.6998	0.0744898	132.667
WBGene00000904	daf-8	40.1778	27.9988	71.1086	0.301574	68
WBGene00000931	dao-5	71.3136	53.8437	105.564	0.243445	1836.33
WBGene00000932	dao-6	30.1578	23.6099	41.7316	0.270977	71.3333
WBGene00003400	dapk-1	27.2539	23.0198	33.3966	0.0758857	91
WBGene00001094	dars-1	59.6177	44.7986	89.0872	0.275595	498
WBGene00010664	dbn-1	38.2216	30.6989	50.6279	0.235805	200
WBGene00000937	dbr-1	40.4216	29.9545	62.1327	0.258554	168
WBGene00014054	dbt-1	71.0628	54.9639	100.499	0.25398	78.3333
WBGene00014243	dcaf-1	32.4512	26.4678	41.93	0.210625	285.667
WBGene00003582	dcap-2	32.663	24.2123	50.1756	0.315448	235.333
WBGene00010428	dcn-1	42.3638	31.5661	64.3889	0.272097	519.333
WBGene00000938	dcp-66	58.4401	46.8961	77.5235	0.186182	3350.33
WBGene00000939	dcr-1	95.8216	68.3923	159.985	0.21533	646.333
WBGene00000940	dcs-1	38.5423	27.9334	62.1443	0.335361	256.667
WBGene00015776	dct-1	77.7519	59.27	112.983	0.216612	809
WBGene00010890	ddb-1	33.3765	25.8474	47.0949	0.276374	156.333
WBGene00015308	ddi-1	46.4927	28.5978	124.228	0.485487	450
WBGene00019125	ddl-1	18.0433	13.9215	25.6322	0.304359	71.3333
WBGene00017381	ddr-2	32.2144	23.398	51.6921	0.386961	314.333
WBGene00018967	ddx-15	55.6959	40.801	87.7186	0.328385	747
WBGene00010260	ddx-17	116.824	77.767	234.694	0.243927	1870.33
WBGene00011580	ddx-19	59.1588	44.5827	87.8958	0.112819	380
WBGene00017162	ddx-23	43.0679	33.8395	59.2173	0.278015	960.667
WBGene00022148	ddx-27	41.2154	29.9528	66.0517	0.366584	251.333
WBGene00011032	ddx-52	55.7963	44.2271	75.5624	0.161352	297.667
WBGene00009717	dep-1	38.5362	32.0833	48.2384	0.127638	468
WBGene00020109	der-2	34.5432	26.2515	50.4914	0.276987	135
WBGene00017028	dex-1	69.0909	55.1992	92.3263	0.278586	620
WBGene00000959	dgk-2	39.9641	33.3864	49.7695	0.215754	341.667
WBGene00006483	dgk-4	44.5393	32.3083	71.6723	0.223567	146.333
WBGene00000961	dgn-1	52.4035	45.8629	61.12	0.0883459	876.333
WBGene00000962	dhc-1	69.6179	46.0868	142.246	0.403816	873.667
WBGene00007974	dhfr-1	25.61	19.8425	36.104	0.255308	198.333
WBGene00008606	dhhc-1	33.7594	26.842	45.48	0.238813	382
WBGene00019344	dhhc-10	53.1184	37.924	88.6273	0.351322	249.667
WBGene00044071	dhhc-14	36.7065	23.8962	79.1236	0.425182	117
WBGene00018009	dhhc-3	29.3839	25.0977	35.4357	0.161083	215
WBGene00014075	dhhc-4	59.769	48	79.1839	0.127904	299.667
WBGene00010892	dhhc-6	63.4827	39.973	154.136	0.235107	196.667
WBGene00007637	dhhc-7	70.9851	45.5612	160.606	0.437383	282.667
WBGene00012718	dhhc-8	69.5623	43.6759	170.787	0.467779	75.6667
WBGene00016620	dhhc-9	38.2346	27.9072	60.6957	0.286724	342.333
WBGene00012460	dhps-1	31.0994	21.7486	54.556	0.439333	68
WBGene00000965	dhs-1	15.259	11.1608	24.1134	0.420671	99.6667
WBGene00000976	dhs-13	44.8833	31.2556	79.5817	0.312656	157
WBGene00000985	dhs-22	35.9154	28.0385	49.9468	0.343683	227.333
WBGene00000988	dhs-25	31.4189	27.0494	37.4722	0.195053	560
WBGene00000990	dhs-27	42.5328	28.3256	85.3329	0.371307	148
WBGene00000992	dhs-29	29.1616	21.9592	43.3949	0.309357	378
WBGene00000970	dhs-6	53.8866	43.3668	71.1446	0.166109	250
WBGene00017735	did-2	31.5605	25.9569	40.2498	0.219978	918.333
WBGene00000995	die-1	33	24.9979	48.5371	0.34284	1483
WBGene00008549	din-1	43.0299	32.2605	64.5926	0.312447	4008.67
WBGene00017885	dip-2	25.8882	21.7721	31.9234	0.170388	561.667
WBGene00001001	dis-3	39.9238	32.2505	52.3884	0.201569	437
WBGene00001002	div-1	42.2992	31.8305	63.0288	0.281198	785.333
WBGene00015184	djr-1.1	78.1132	57.103	123.584	0.164788	158.667
WBGene00012352	dkf-1	43.5521	35.8508	55.4671	0.120019	69
WBGene00009082	dlat-1	32.4886	29.0498	36.8509	0.105241	149.333
WBGene00001005	dlc-1	225.824	116.679	3497.12	0.317569	294.333
WBGene00010794	dld-1	71.6374	52.315	113.592	0.248768	167.667
WBGene00001006	dlg-1	62.1325	46.9366	91.8784	0.297378	1683.33
WBGene00001007	dli-1	73.1292	46.3235	173.564	0.577987	685.667
WBGene00011345	dma-1	27.4111	19.8876	44.0905	0.386144	163.667
WBGene00007776	dmd-4	27.5996	21.6364	38.1007	0.22159	440.333
WBGene00017326	dmd-5	18.0631	14.3338	24.4152	0.293935	1759.67
WBGene00007058	dmd-6	26.365	19.6466	40.0663	0.369612	107.333
WBGene00019521	dmd-7	103.484	68.458	211.901	0.325415	182.667
WBGene00001016	dna-2	22.6399	18.1076	30.1986	0.31612	75.6667
WBGene00001017	dnc-1	72.2406	41.6745	271.021	0.432187	1023.33
WBGene00001018	dnc-2	83.634	62.769	125.277	0.130817	622.333
WBGene00021149	dnc-3	47.9609	38.6721	63.1226	0.159619	663.333
WBGene00022118	dnc-5	19.9111	16.0074	26.3328	0.278424	177.667
WBGene00021827	dnc-6	37.1439	24.7897	74.0449	0.349916	69.6667
WBGene00001019	dnj-1	30.4239	25.9687	36.7245	0.175362	491
WBGene00001028	dnj-10	42.2092	31.5763	63.6386	0.326344	236.333
WBGene00001029	dnj-11	49.8161	40.095	65.7596	0.252406	946.333
WBGene00001030	dnj-12	96.6748	87.8673	107.445	0.0665534	1079.33
WBGene00001031	dnj-13	15.7912	12.8505	20.4771	0.256637	630.667
WBGene00001032	dnj-14	30.5646	22.2435	48.8324	0.339702	392.667
WBGene00001033	dnj-15	26.9098	20.15	40.4947	0.260085	76
WBGene00001034	dnj-16	39.7188	31.5529	53.5869	0.234055	333.667
WBGene00001035	dnj-17	34.5483	24.7344	57.2726	0.38386	207
WBGene00001036	dnj-18	18.8216	13.2342	32.5746	0.468174	54.3333
WBGene00001037	dnj-19	106.243	69.2222	228.383	0.272937	1281.33
WBGene00001020	dnj-2	32.6736	27.6762	39.8735	0.156927	127.333
WBGene00001038	dnj-20	51.1263	44.1308	60.7573	0.140041	375.333
WBGene00001039	dnj-21	43.9044	29.7735	83.5658	0.432876	60.3333
WBGene00001040	dnj-22	19.604	15.0626	28.0659	0.38165	272
WBGene00001041	dnj-23	40.7832	28.3507	72.6358	0.348985	548
WBGene00001042	dnj-24	52.4406	34.3572	110.712	0.625254	102.667
WBGene00001043	dnj-25	35.3139	29.3167	44.3957	0.192034	127.667
WBGene00001045	dnj-27	81.1664	67.9343	100.8	0.174904	2432
WBGene00001048	dnj-30	36.0057	29.9133	45.2144	0.189105	253.333
WBGene00001023	dnj-5	91.5623	72.276	124.888	0.202801	1208.33
WBGene00001025	dnj-7	96.1669	61.0188	226.82	0.475457	665
WBGene00001026	dnj-8	71.4835	53.9239	106.001	0.270257	498.333
WBGene00001027	dnj-9	33.5008	26.8264	44.5963	0.153663	94
WBGene00017163	dnpp-1	60.474	47.969	81.7978	0.0594265	269
WBGene00016074	dnsn-1	22.0069	15.4488	38.2395	0.423222	166.333
WBGene00001049	dog-1	40.7035	35.31	48.0418	0.056676	256.667
WBGene00007555	dohh-1	311.778	170.214	1852.32	0.337686	1472.33
WBGene00021474	dot-1.1	61.8577	52.1162	76.0781	0.101162	926.667
WBGene00001055	dpf-2	37.6164	26.9319	62.3536	0.294112	67.3333
WBGene00001056	dpf-3	45.8199	38.1323	57.3898	0.120093	148.667
WBGene00001057	dpf-4	83.324	59.1093	141.146	0.0833967	202.667
WBGene00016200	dpff-1	27.822	22.2844	37.0218	0.260631	841
WBGene00007576	dph-1	62.3134	48.8466	86.0321	0.0119491	162.667
WBGene00007488	dph-2	33.4559	22.2204	67.6744	0.379249	113.333
WBGene00001061	dpl-1	37.4714	31.5949	46.0334	0.171208	587.667
WBGene00022044	dpm-1	41.8619	30.9574	64.6254	0.275187	216
WBGene00008532	dpt-1	65.2467	42.6032	139.267	0.573423	283.667
WBGene00001077	dpy-18	78.6231	50.0565	183.137	0.353786	230.667
WBGene00001078	dpy-19	32.1421	21.3409	65.0813	0.518028	76.6667
WBGene00001080	dpy-21	37.1429	27.2447	58.3376	0.311166	762.667
WBGene00001081	dpy-22	105.684	66.8616	252.011	0.311586	3501
WBGene00001082	dpy-23	103.21	60.2981	357.948	0.317723	494.667
WBGene00001085	dpy-26	48.4088	39.1554	63.3892	0.176853	1045.67
WBGene00001086	dpy-27	31.0069	24.9298	41.0017	0.248126	1537
WBGene00001087	dpy-28	59.3505	38.2395	132.501	0.376719	510.667
WBGene00001088	dpy-30	94.6492	67.7773	156.826	0.309701	3541
WBGene00006592	dpy-31	35.3957	29.34	44.6014	0.12827	194.333
WBGene00016103	dpyd-1	72.7329	52.8953	116.379	0.269281	485.333
WBGene00009584	drap-1	42.9739	36.8618	51.5157	0.143765	506
WBGene00001089	dre-1	33.1067	27.1722	42.3578	0.144293	180
WBGene00008400	drh-3	34.0943	28.88	41.6064	0.168724	225.333
WBGene00011730	drr-2	99.6195	62.3184	248.153	0.425258	1154
WBGene00009163	drsh-1	15.2694	12.8399	18.8326	0.111183	76.3333
WBGene00019595	dscc-1	23.6224	19.4411	30.0951	0.166355	169
WBGene00001101	dsh-1	37.9481	27.537	61.0175	0.335591	1000.67
WBGene00001102	dsh-2	20.915	17.5022	25.9812	0.225692	602.667
WBGene00001109	dsl-7	46.3027	29.5263	107.229	0.473638	207
WBGene00022492	dss-1	71.278	41.0022	272.463	0.388612	122.333
WBGene00001112	duo-3	23.3168	18.2849	32.1696	0.293636	122
WBGene00013201	dus-2	39.5757	32.9026	49.6443	0.107506	138.333
WBGene00010609	dut-1	39.7311	26.7221	77.422	0.384277	196
WBGene00022554	duxl-1	54.8864	38.3192	96.6898	0.35099	852
WBGene00011834	dvc-1	18.1906	14.419	24.6342	0.244576	109
WBGene00022861	dve-1	39.9485	27.216	75.0676	0.258811	134.667
WBGene00013128	dxbp-1	29.6754	23.2776	40.9231	0.24711	421
WBGene00001115	dyb-1	47.3272	36.9427	65.8324	0.197479	322.333
WBGene00015927	dyci-1	39.744	30.1866	58.1575	0.259128	289.667
WBGene00008764	dylt-1	63.5215	42.3297	127.205	0.387881	221
WBGene00001130	dyn-1	62.4653	45.9047	97.7184	0.331774	283
WBGene00012004	dyrb-1	58.2062	43.2418	89.0092	0.166927	145.333
WBGene00017084	E01A2.1	25.3771	17.3351	47.3378	0.423659	269.667
WBGene00008446	E01G4.3	9.71931	8.06746	12.2218	0.094283	102.667
WBGene00008455	E02H1.1	76.6912	61.921	100.715	0.147455	483.667
WBGene00008458	E02H1.6	34.1807	26.2873	48.8487	0.193216	129.667
WBGene00017011	eaf-1	24.9717	20.3454	32.321	0.24126	331.667
WBGene00001337	ears-1	88.2974	63.4944	144.901	0.111654	1191.33
WBGene00001338	ears-2	31.6109	28.0309	36.2392	0.0574423	224.333
WBGene00018270	eas-1	86.6342	62.7638	139.805	0.324449	393
WBGene00001145	eat-16	120.332	82.8085	220.039	0.250214	1094.67
WBGene00020770	eat-17	34.2735	26.2149	49.4856	0.320139	109
WBGene00001148	eat-20	52.6528	45.9987	61.5577	0.0770021	264.667
WBGene00001134	eat-3	28.1649	26.0442	30.6615	0.0423299	312.667
WBGene00004140	ebax-1	61.5178	45.8892	93.2895	0.261959	1786
WBGene00012156	ebp-2	46.5936	33.2034	78.0821	0.35315	512
WBGene00001150	ech-1.1	47.8316	34.3774	78.5888	0.159253	100.333
WBGene00020347	ech-1.2	108.135	69.4095	244.608	0.236659	620.667
WBGene00001153	ech-4	42.1236	32.7536	59.0027	0.339882	235
WBGene00001154	ech-5	34.6644	27.3124	47.4321	0.149513	99
WBGene00002297	ect-2	37.0975	29.939	48.755	0.247173	344.667
WBGene00011696	eea-1	36.0988	29.0026	47.7924	0.130846	663.333
WBGene00017138	EEED8.10	71.1381	47.2851	143.554	0.416779	199
WBGene00017143	EEED8.15	83.7356	58.9629	144.407	0.186736	2498.33
WBGene00012768	eef-1B.2	131.631	91.9307	231.682	0.260046	946
WBGene00008920	eef-1G	164.048	116.999	274.384	0.480705	3507.33
WBGene00001167	eef-2	409.668	271.654	832.744	0.295011	8426
WBGene00022069	eel-1	47.1105	36.6907	65.7959	0.245589	680.667
WBGene00013223	efa-6	23.4392	19.877	28.5568	0.187031	218.667
WBGene00012980	efhd-1	70.962	55.6589	97.8711	0.272373	844.667
WBGene00001160	efk-1	71.7591	42.7201	224.072	0.330157	266.667
WBGene00001161	efl-1	63.0925	42.7626	120.271	0.380343	483.667
WBGene00009899	efl-3	25.8347	20.0723	36.2379	0.342282	1518
WBGene00001163	efn-2	32.573	27.2471	40.4868	0.195728	429
WBGene00001165	efn-4	14.2281	11.0625	19.9317	0.324402	187
WBGene00016311	efr-3	38.6413	31.2968	50.4897	0.0208791	147.333
WBGene00001166	eftu-2	58.9725	44.1075	88.9502	0.290931	1128.33
WBGene00015680	egal-1	61.5628	43.1962	107.102	0.119707	285
WBGene00017147	EGAP2.1	22.2626	14.9683	43.424	0.476735	107.333
WBGene00001170	egl-1	14.7634	10.2911	26.1104	0.419869	94.3333
WBGene00001179	egl-10	36.1372	28.6391	48.9541	0.217895	142.333
WBGene00001186	egl-18	31.5811	24.9888	42.8981	0.244724	698.667
WBGene00001187	egl-19	41.2339	25.6176	105.618	0.732167	207.333
WBGene00001193	egl-26	24.2189	21.7003	27.3987	0.0787051	221.333
WBGene00001194	egl-27	22.255	18.5388	27.8346	0.192889	1750.33
WBGene00001196	egl-30	138.838	88.869	317.177	0.421661	2816
WBGene00001207	egl-43	33.8502	22.5492	67.8599	0.570591	87
WBGene00001208	egl-44	24.5395	20.199	31.2559	0.208554	476.667
WBGene00001209	egl-45	61.9598	50.5967	79.9049	0.19082	914.667
WBGene00001210	egl-46	38.6543	33.504	45.6757	0.114534	1035.67
WBGene00001178	egl-9	28.6215	23.424	36.783	0.223447	185.667
WBGene00007772	egrh-1	20.5568	15.5223	30.4249	0.330718	80.6667
WBGene00044651	egrh-3	66.398	50.2635	97.7876	0.199041	148.333
WBGene00009098	ehbp-1	38.1578	31.3496	48.7434	0.24326	245
WBGene00001224	ehs-1	49.5762	37.976	71.3802	0.226489	269.667
WBGene00020868	eif-1	98.73	77.7682	135.162	0.0622527	1786
WBGene00019162	eif-1.A	41.8284	33.0906	56.8364	0.259257	746.667
WBGene00008480	eif-2A	20.8902	17.5704	25.7568	0.0646753	115
WBGene00021351	eif-2alpha	44.2392	31.4779	74.4018	0.434848	232
WBGene00014221	eif-2Balpha	27.6303	19.8359	45.5156	0.373264	335.667
WBGene00012950	eif-2Bbeta	26.7628	18.2108	50.4582	0.448	95.6667
WBGene00008670	eif-2Bdelta	34.7506	27.3581	47.6173	0.251112	256.667
WBGene00008428	eif-2Bepsilon	21.3954	15.613	33.9802	0.420739	166
WBGene00010560	eif-2beta	55.7285	43.6933	76.9145	0.227645	688.333
WBGene00004090	eif-2Bgamma	30.0107	24.9612	37.6211	0.196231	250.667
WBGene00016113	eif-2D	16.3704	12.8432	22.5684	0.145652	96
WBGene00021466	eif-2gamma	154.588	95.9565	397.419	0.261668	526.667
WBGene00001225	eif-3.B	55.7774	45.3454	72.4436	0.207298	547.333
WBGene00001226	eif-3.C	47.7086	37.8183	64.604	0.237384	975.333
WBGene00001227	eif-3.D	46.7407	38.0859	60.4857	0.228744	586.333
WBGene00001228	eif-3.E	40.5489	32.3535	54.3046	0.187161	155.333
WBGene00001229	eif-3.F	131.153	63.1372	-1697.3	0.544693	292.333
WBGene00001230	eif-3.G	59.155	49.4889	73.5137	0.173651	920.333
WBGene00001231	eif-3.H	44.6786	37.1087	56.1285	0.22215	257.333
WBGene00001232	eif-3.I	47.195	41.5461	54.6218	0.0721954	207.667
WBGene00012738	eif-3.J	51.0598	32.9678	113.159	0.437062	635
WBGene00001233	eif-3.K	45.4866	34.625	66.2775	0.193654	344.333
WBGene00015920	eif-3.L	51.9444	38.7994	78.56	0.296343	484.333
WBGene00001234	eif-6	41.5833	31.1353	62.5846	0.324465	706
WBGene00009052	ekl-1	51.7574	38.5341	78.7974	0.386533	184.333
WBGene00013676	ekl-4	30.5184	23.1152	44.8982	0.345374	520.333
WBGene00011806	ekl-6	43.6595	35.4272	56.8758	0.193837	550
WBGene00001235	elb-1	59.2918	40.2647	112.412	0.396375	664
WBGene00001236	elc-1	164.763	81.3371	-6414.58	0.360925	266
WBGene00018330	elks-1	42.3931	28.7968	80.3121	0.385943	480.667
WBGene00021281	ell-1	65.6764	50.6142	93.5013	0.193394	719
WBGene00001239	elo-1	27.9388	23.5262	34.3889	0.10484	134.667
WBGene00001240	elo-2	52.8879	41.9941	71.4136	0.201111	189.333
WBGene00001241	elo-3	26.904	23.5652	31.3451	0.125827	217
WBGene00001244	elo-6	54.0863	49.7644	59.2303	0.0568159	1713.33
WBGene00001247	elo-9	34.906	24.0104	63.905	0.200015	68
WBGene00013219	elof-1	31.1994	26.851	37.2285	0.165196	1892.33
WBGene00022463	elpc-1	35.4861	30.8583	41.7468	0.135071	311.667
WBGene00014123	elpc-3	29.0231	20.0834	52.3056	0.432057	111.333
WBGene00016128	elpc-4	56.2765	42.1173	84.7772	0.298434	83.6667
WBGene00001253	elt-6	64.6989	52.6382	83.9292	0.202027	153
WBGene00001281	emb-27	28.6509	22.3794	39.8059	0.310061	369
WBGene00001284	emb-30	40.7479	32.4794	54.6641	0.229762	468.333
WBGene00001258	emb-4	102.996	64.9068	249.287	0.411829	582
WBGene00001259	emb-5	65.3287	46.3358	110.707	0.297761	1388.67
WBGene00021973	emc-2	90.0569	61.328	169.422	0.28993	321
WBGene00017999	emc-6	41.1958	29.8523	66.4437	0.327727	282
WBGene00018923	eme-1	56.6029	34.723	153.033	0.04989	78.3333
WBGene00001309	emr-1	42.7023	28.44	85.6593	0.372515	726.667
WBGene00017164	eng-1	27.4224	21.9651	36.4878	0.242596	63.3333
WBGene00011884	enol-1	94.3023	75.8582	124.597	0.189064	392
WBGene00011480	enpl-1	194.78	135.426	346.752	0.252141	24651.3
WBGene00018386	enri-1	19.3863	15.45	26.0143	0.246564	264.333
WBGene00010730	ensa-1	70.8013	56.3497	95.2225	0.157201	376
WBGene00001320	ent-1	172.542	97.4752	750.539	0.201847	258.667
WBGene00009499	ent-6	45.1324	32.8673	72.0011	0.366147	372.333
WBGene00008003	enu-3.2	64.1314	38.601	189.397	0.508096	135.333
WBGene00001324	eor-1	35.5647	28.9238	46.1641	0.185098	541.667
WBGene00001325	eor-2	21.2243	17.5412	26.8652	0.225833	577.667
WBGene00007030	epc-1	41.707	34.0344	53.8458	0.214211	2762.67
WBGene00021468	epg-2	57.4658	50.4399	66.7658	0.119761	6084.33
WBGene00012559	epg-3	70.1735	44.1815	170.447	0.450242	114.667
WBGene00018150	epg-4	55.8065	45.2237	72.8554	0.122287	448.667
WBGene00016968	epg-5	32.9843	22.1438	64.6184	0.414029	53
WBGene00012641	epg-6	38.9147	26.3044	74.7495	0.392494	747.667
WBGene00020334	epg-7	39.1635	34.0493	46.0855	0.118928	675.333
WBGene00013695	epg-8	55.1362	45.3837	70.2274	0.135418	709
WBGene00019487	ephx-1	67.9762	51.6393	99.4338	0.209086	101.667
WBGene00001328	epi-1	45.475	34.6396	66.1748	0.280442	1731.33
WBGene00001329	epn-1	58.9289	45.3355	84.1652	0.258175	1187
WBGene00001330	eps-8	64.738	44.8103	116.585	0.458788	696
WBGene00018797	ept-1	40.1423	32.5423	52.3737	0.124377	175
WBGene00001331	erd-2.1	150.987	96.8415	342.465	0.6872	2375.67
WBGene00016195	erd-2.2	81.8859	70.6506	97.3704	0.131134	1127.33
WBGene00010405	erfa-3	53.2267	39.3734	82.1204	0.253235	471
WBGene00019971	ergo-1	44.3996	37.3094	54.8169	0.171966	321.333
WBGene00011892	erh-1	48.7799	31.4124	109.1	0.611501	1089
WBGene00009444	erh-2	19.8959	14.1988	33.2283	0.437171	246.333
WBGene00001332	eri-1	44.5228	32.8932	68.8736	0.145812	73
WBGene00007091	eri-12	113.09	78.506	202.136	0.23865	1446.67
WBGene00021103	eri-3	33.6385	21.7506	74.1836	0.284977	80.6667
WBGene00016566	eri-7	56.0873	41.3802	87.0133	0.327884	123
WBGene00016143	eri-9	44.8165	35.2839	61.4065	0.213158	118.667
WBGene00001333	erm-1	107.635	70.734	225.028	0.345281	296.667
WBGene00001334	ero-1	44.8999	36.2601	58.9447	0.223068	288.333
WBGene00016278	erp-44.1	63.8291	47.2664	98.2608	0.195646	173.667
WBGene00015510	erp-44.2	41.5496	37.1581	47.1182	0.124678	502.333
WBGene00018371	ess-2	20.7586	17.2828	25.9844	0.185457	138.667
WBGene00008429	etc-1	23.6724	18.4903	32.8903	0.24232	193.667
WBGene00007886	ethe-1	45.8128	25.4223	231.466	0.480984	122.667
WBGene00001340	etr-1	45.0395	28.7552	103.851	0.331633	209.667
WBGene00017606	ets-6	26.4877	20.5843	37.1388	0.275777	183
WBGene00001352	evl-14	70.5008	51.0039	114.128	0.299549	768.667
WBGene00009372	evl-18	18.5564	14.713	25.1179	0.271564	232.333
WBGene00001358	evl-20	21.3332	15.9043	32.389	0.350107	84.6667
WBGene00001365	exc-4	65.0564	49.1963	96.0078	0.198568	489
WBGene00001368	exc-7	37.7914	30.8693	48.7152	0.134868	240
WBGene00017644	exc-9	48.3653	36.3765	72.1413	0.155575	726
WBGene00001371	exl-1	57.2341	36.7436	129.389	0.525538	88
WBGene00001372	exo-3	30.0787	22.6391	44.8012	0.304489	143
WBGene00016606	exoc-7	43.3255	34.5644	58.0357	0.164601	218
WBGene00013687	exoc-8	31.3203	26.7855	37.7036	0.155523	251
WBGene00022232	exos-2	32.4668	22.7599	56.6107	0.49233	225
WBGene00010325	exos-3	21.5762	17.1762	29.0069	0.271141	273.333
WBGene00000202	exos-4.2	35.9367	27.5374	51.7087	0.297554	95
WBGene00018305	exos-8	40.9292	31.2971	59.1261	0.28833	449
WBGene00018154	exos-9	49.8061	37.3102	74.8873	0.283434	171.333
WBGene00001377	eya-1	22.9083	18.5668	29.8998	0.244879	1582.67
WBGene00013147	eyg-1	29.2563	17.9659	78.7378	0.464946	688.333
WBGene00008488	F01D4.5	41.4755	35.7491	49.3864	0.105551	192
WBGene00017169	F01F1.15	97.2325	69.9076	159.626	0.159853	1407
WBGene00017159	F01F1.2	23.5261	16.989	38.2402	0.309064	114.333
WBGene00008505	F01G4.6	82.0805	64.6171	112.479	0.211828	1215.67
WBGene00008528	F02E9.1	20.4487	17.2669	25.068	0.181788	189
WBGene00008533	F02E9.10	29.727	23.1908	41.3935	0.303857	195.667
WBGene00008530	F02E9.5	36.6787	31.3736	44.143	0.166555	591.333
WBGene00008531	F02E9.7	55.6294	42.2553	81.3898	0.278845	175.333
WBGene00008543	F07A5.4	86.7738	54.9095	206.754	0.564242	235
WBGene00017197	F07C3.9	50.5196	24.645	-1012.62	0.440802	211.333
WBGene00008555	F07C6.4	33.4532	28.7646	39.968	0.0852963	404
WBGene00017210	F07E5.5	222.315	116.226	2548.88	0.554834	490
WBGene00017220	F07F6.8	31.8031	23.8196	47.8363	0.293202	632.667
WBGene00304813	F07G6.11	5.78962	4.57362	7.88639	0.249982	128.667
WBGene00008563	F07H5.13	68.7845	47.0355	127.946	0.353951	5021.33
WBGene00017239	F08B6.1	15.0463	11.6816	21.1336	0.350082	164.667
WBGene00017275	F08F8.10	26.0112	18.3198	44.8346	0.390103	80.6667
WBGene00017272	F08F8.7	43.6533	28.8402	89.7524	0.416746	83
WBGene00017274	F08F8.9	55.4275	44.033	74.7779	0.172217	578.667
WBGene00008585	F08G12.1	52.9627	40.3191	77.1585	0.317835	382.667
WBGene00008576	F08G2.4	16.0441	12.7755	21.5601	0.232501	131
WBGene00008578	F08G2.7	22.9449	18.0618	31.4467	0.308186	273.333
WBGene00008622	F09C8.2	120.889	75.8454	297.674	0.279155	2954
WBGene00017296	F09E10.6	65.7957	48.2567	103.363	0.251046	691.333
WBGene00017289	F09E5.11	31.2178	26.0447	38.9552	0.194147	292.333
WBGene00017283	F09E5.3	52.1752	35.3039	99.9313	0.495132	264.667
WBGene00017285	F09E5.7	76.0901	47.4239	192.374	0.765543	184.333
WBGene00017286	F09E5.8	28.1274	23.4681	35.0951	0.22377	225.667
WBGene00017311	F09G2.2	27.9174	20.6966	42.8767	0.323505	638.333
WBGene00017316	F09G2.8	38.5121	30.1053	53.4331	0.204166	245.667
WBGene00008645	F10C2.4	20.6352	17.9568	24.2528	0.117011	203
WBGene00008646	F10C2.5	17.232	14.1363	22.0637	0.214471	174.667
WBGene00008648	F10D11.2	32.0048	22.8204	53.5611	0.399591	545.333
WBGene00017342	F10D7.5	56.1924	36.8495	118.278	0.408868	89
WBGene00017344	F10E7.2	23.5386	16.2994	42.3461	0.450715	159
WBGene00017347	F10E7.5	80.9299	58.6742	130.387	0.346151	1376
WBGene00017348	F10E7.6	28.0858	23.5755	34.7302	0.203292	103.333
WBGene00017360	F10E9.11	33.4451	23.8527	55.9425	0.412373	504.667
WBGene00017355	F10E9.3	18.6008	15.825	22.5575	0.164457	87.6667
WBGene00017358	F10E9.7	27.3631	19.0111	48.8034	0.385755	198.667
WBGene00017373	F10G7.10	61.6173	45.6105	94.9339	0.0233455	119.333
WBGene00017369	F10G7.5	260.693	61.4975	-116.428	0.420179	206.667
WBGene00017372	F10G7.9	37.2698	30.3386	48.3058	0.200685	373.667
WBGene00008666	F10G8.8	35.4618	29.8676	43.6345	0.171821	644.667
WBGene00008686	F11A10.5	40.9197	30.4708	62.2747	0.235949	196.333
WBGene00008690	F11C1.1	28.6265	22.4836	39.388	0.282019	383.667
WBGene00045495	F11C1.7	46.8206	42.1996	52.5782	0.0693609	414
WBGene00017380	F11D5.1	52.1709	41.8261	69.3145	0.226236	200.333
WBGene00008711	F11E6.8	94.9528	63.2609	190.275	0.189664	235.667
WBGene00017385	F11G11.5	38.1867	27.5614	62.144	0.341631	156.667
WBGene00008720	F12F6.1	25.2727	21.6094	30.4316	0.151911	846.667
WBGene00008722	F12F6.7	37.8751	27.1389	62.666	0.304987	226.333
WBGene00045357	F13A7.14	18.3314	14.1346	26.0728	0.286028	71
WBGene00008729	F13B12.1	49.3435	36.43	76.4393	0.377062	1362.33
WBGene00008733	F13B12.6	19.3769	16.6257	23.2191	0.0952145	111.667
WBGene00017423	F13C5.2	77.9481	55.7936	129.285	0.304461	6102.33
WBGene00008745	F13E6.1	133.456	96.1337	218.146	0.338386	2433.67
WBGene00008760	F13E9.11	122.827	67.5892	672.149	0.341357	1797
WBGene00008768	F13G3.10	40.9812	26.8811	86.1921	0.425677	181
WBGene00008766	F13G3.6	61.8636	45.4865	96.6683	0.128636	130.333
WBGene00008767	F13G3.7	27.7706	23.1956	34.5936	0.166424	325.667
WBGene00008777	F13H10.6	48.3648	33.2761	88.4892	0.31709	102.333
WBGene00044784	F13H10.8	33.2656	24.4629	51.9641	0.316834	139.667
WBGene00045056	F13H10.9	30.1795	19.4996	66.7245	0.397715	38.3333
WBGene00017435	F13H8.2	37.6352	27.1236	61.4497	0.345142	511.667
WBGene00008779	F14B4.1	57.5361	48.9668	69.741	0.135976	4847
WBGene00008800	F14E5.2	62.2474	50.8642	80.1946	0.108835	414
WBGene00008838	F15A4.2	24.9339	18.7424	37.234	0.320014	209.333
WBGene00008876	F16A11.1	21.0771	17.9642	25.495	0.0773773	103.667
WBGene00008880	F16B12.4	39.0587	32.1437	49.7645	0.173562	281
WBGene00008882	F16B12.6	25.8497	22.7449	29.9363	0.12893	515.333
WBGene00017536	F17A9.4	62.3667	49.7757	83.4847	0.228935	1517.67
WBGene00008922	F17C11.11	19.1862	17.0622	21.9142	0.1316	92.6667
WBGene00008924	F17E5.2	37.7778	29.4768	52.5869	0.292324	70.3333
WBGene00008925	F17H10.1	25.1142	19.4579	35.4066	0.308017	149.667
WBGene00008934	F18C12.3	45.0037	32.9045	71.1756	0.261759	452.667
WBGene00017563	F18C5.10	94.5258	60.8276	211.939	0.738893	925
WBGene00008939	F18H3.1	30.4546	23.5381	43.1273	0.230385	274
WBGene00008940	F18H3.4	25.9736	19.6054	38.4693	0.326882	126
WBGene00017583	F19B10.1	25.8223	17.0765	52.9316	0.4866	184.667
WBGene00008948	F19B6.1	80.9674	59.4511	126.892	0.146021	153
WBGene00008951	F19C6.2	35.6773	27.5008	50.7728	0.227174	339.667
WBGene00017607	F19F10.11	37.1351	24.3865	77.814	0.431303	128.333
WBGene00008970	F20C5.5	20.246	15.7354	28.3816	0.136183	84
WBGene00008971	F20C5.6	134.925	76.5486	568.371	0.549137	1166.67
WBGene00008975	F20D1.3	54.1236	33.7113	137.197	0.49404	145.333
WBGene00017642	F20D12.2	27.3152	22.3686	35.0708	0.238508	577.667
WBGene00008986	F20G2.2	107.199	78.1985	170.39	0.234709	134
WBGene00017659	F21C10.10	38.6881	27.049	67.9092	0.373951	958
WBGene00009010	F21D5.5	28.7201	24.2998	35.1062	0.136347	80
WBGene00009011	F21D5.6	57.4163	43.3142	85.1338	0.225904	201.333
WBGene00009020	F21D9.6	20.4449	14.1891	36.567	0.380145	258
WBGene00017666	F21E9.2	33.3781	22.3093	66.2463	0.428266	99.3333
WBGene00017675	F21F3.6	86.2433	51.6529	261.084	0.418608	404.667
WBGene00017676	F21F3.7	27.8743	22.0928	37.7542	0.234943	150.667
WBGene00009027	F21G4.6	43.4945	32.2045	66.9735	0.260512	144
WBGene00009042	F22B5.4	45.1196	32.7155	72.6741	0.342331	231.667
WBGene00009050	F22D6.2	27.0287	23.0088	32.7506	0.173573	1043.33
WBGene00009065	F22G12.5	57.8025	35.5665	154.22	0.547338	146.667
WBGene00009084	F23B12.7	52.0796	36.648	89.9596	0.506753	564.333
WBGene00017734	F23C8.5	62.035	38.6246	157.489	0.467147	291
WBGene00017746	F23F1.5	55.3759	33.0663	170.226	0.132173	80.3333
WBGene00017758	F23H11.2	33.7208	26.775	45.5326	0.228324	117.333
WBGene00017760	F23H11.4	21.9941	19.1407	25.8473	0.130574	246.667
WBGene00000263	F23H11.5	71.3902	46.7728	150.713	0.45162	96.6667
WBGene00017767	F25B4.4	18.7574	13.0146	33.5707	0.474135	110.667
WBGene00017776	F25B5.5	34.2448	23.8091	60.9669	0.482256	67.3333
WBGene00017777	F25B5.6	60.5144	38.8855	136.361	0.509029	181.333
WBGene00017782	F25E5.1	30.6308	22.8805	46.3215	0.370701	98.6667
WBGene00017795	F25F8.1	65.032	36.1176	326.079	0.288876	74.6667
WBGene00017796	F25G6.1	63.3399	41.1996	136.919	0.281867	192.333
WBGene00017799	F25G6.8	35.3024	27.1093	50.593	0.290092	243
WBGene00017800	F25G6.9	26.3174	21.2133	34.6558	0.209617	138.333
WBGene00009118	F25H2.4	36.8916	26.023	63.3499	0.363568	918.333
WBGene00009120	F25H2.6	23.4498	19.6187	29.1403	0.215659	244
WBGene00009131	F25H8.1	25.1755	19.7894	34.59	0.25367	226.667
WBGene00009132	F25H8.2	28.53	21.5806	42.0808	0.299068	427
WBGene00009138	F25H9.6	42.2028	36.1639	50.663	0.0827439	214.333
WBGene00009139	F25H9.7	30.112	22.7102	44.6719	0.259736	118.667
WBGene00017801	F26A1.1	20.4359	14.9564	32.2515	0.377921	379.333
WBGene00017814	F26A10.2	88.7918	56.8353	202.845	0.493381	200.667
WBGene00009140	F26A3.1	46.4423	28.8246	119.452	0.434446	130.333
WBGene00009145	F26A3.7	25.8015	19.3368	38.7597	0.327327	161.333
WBGene00009159	F26E4.4	27.3393	19.0476	48.4146	0.41773	369.333
WBGene00009162	F26E4.7	38.0401	34.6768	42.126	0.0555675	879.333
WBGene00017835	F26F12.4	50.5	31.9396	120.557	0.474138	261.333
WBGene00009172	F26F2.7	21.6011	15.7281	34.4741	0.345786	74.6667
WBGene00023504	F26F2.8	38.4844	32.8931	46.366	0.159486	656.333
WBGene00017831	F26F4.12	35.4661	25.7794	56.8144	0.209956	95.3333
WBGene00017827	F26F4.5	20.3478	14.654	33.2779	0.412184	94.6667
WBGene00017828	F26F4.6	40.734	31.578	57.3675	0.250381	137.333
WBGene00005011	F26F4.8	22.0184	16.5592	32.8472	0.313663	263.667
WBGene00017829	F26F4.9	23.6317	17.284	37.3485	0.481573	103.333
WBGene00017837	F26G1.1	47.9921	35.2177	75.3085	0.321452	125.667
WBGene00009174	F26H9.2	24.5567	20.2875	31.1014	0.195429	158.333
WBGene00009177	F26H9.5	33.1326	21.3832	73.5412	0.666771	110.333
WBGene00017852	F27C1.2	134.063	104.586	186.675	0.143653	1200
WBGene00017854	F27C1.4	12.8343	9.17394	21.355	0.518068	129.667
WBGene00017855	F27C1.6	35.9117	28.4074	48.804	0.182779	568.333
WBGene00009189	F27D4.4	43.7209	35.0981	57.9605	0.228304	561.333
WBGene00009190	F27D4.6	82.5704	53.4266	181.671	0.0966858	186.333
WBGene00009191	F27D4.7	29.6417	25.1471	36.0926	0.125679	224
WBGene00017889	F28B3.10	59.5467	40.4295	112.961	0.267701	136.667
WBGene00017893	F28B4.4	26.6759	20.7885	37.2157	0.284215	1612.67
WBGene00009200	F28C1.1	29.6401	25.0219	36.3488	0.167402	489.333
WBGene00009201	F28C1.3	43.956	29.1797	89.0496	0.349905	141.333
WBGene00017898	F28C10.3	18.6666	15.2747	23.995	0.205035	120
WBGene00009207	F28C6.8	31.9824	24.3675	46.5203	0.200387	123.667
WBGene00044188	F28F8.9	25.3715	20.2148	34.0599	0.204569	94
WBGene00009233	F28H6.4	29.5994	23.4267	40.1886	0.286939	214.667
WBGene00017916	F29A7.6	18.3645	15.2989	22.9667	0.225765	203.667
WBGene00009277	F30F8.10	50.249	33.1678	103.605	0.394932	55.6667
WBGene00009274	F30F8.5	62.5031	38.6764	162.79	0.305419	74.6667
WBGene00009276	F30F8.9	48.3603	31.3889	105.287	0.50623	65
WBGene00017937	F30H5.3	54.8933	34.3936	135.886	0.482042	912.333
WBGene00017939	F31A3.5	27.3195	22.8941	33.8657	0.153845	281.667
WBGene00196396	F31C3.14	69.5486	45.0158	152.848	0.219181	119.333
WBGene00009285	F31C3.3	55.0387	40.3001	86.7735	0.328852	503
WBGene00009290	F31D4.2	96.1876	68.6833	160.433	0.145089	364
WBGene00219317	F31E3.12	53.1836	32.0634	155.827	0.514121	433
WBGene00017954	F31E8.4	55.4809	37.4139	107.292	0.0912992	213
WBGene00009307	F32A11.1	45.454	36.8478	59.3053	0.215125	311
WBGene00023021	F32A5.9	40.7763	29.2862	67.1039	0.352432	74
WBGene00017980	F32B5.7	35.0437	27.7459	47.5505	0.174693	172
WBGene00009330	F32D8.5	36.1392	26.7211	55.8098	0.298801	259
WBGene00017992	F32E10.5	18.7178	14.6437	25.9328	0.209426	213.333
WBGene00009352	F33A8.4	32.3656	22.096	60.4711	0.504614	242.333
WBGene00018007	F33D11.10	56.8465	38.6137	107.702	0.403209	352.667
WBGene00018011	F33E11.3	28.0179	25.236	31.4892	0.117553	109.667
WBGene00009361	F33E2.5	49.0194	35.1487	80.974	0.320434	1711.33
WBGene00018018	F33G12.6	24.2915	17.5364	39.5112	0.399374	367
WBGene00044666	F33G12.7	20.5874	15.8515	29.3591	0.272019	53.6667
WBGene00009365	F33H1.4	39.9723	33.4929	49.5599	0.0942106	792.667
WBGene00009366	F33H2.2	27.6407	23.1205	34.3579	0.185213	277.333
WBGene00009367	F33H2.3	57.4638	40.3583	99.7359	0.350867	3841
WBGene00009369	F33H2.6	40.4133	30.7512	58.9292	0.25117	139
WBGene00009373	F34D10.3	30.2178	25.2441	37.6321	0.154036	288.333
WBGene00009380	F34H10.3	45.846	30.0004	97.168	0.454107	102.667
WBGene00001335	F35A5.8	33.5271	28.3276	41.0644	0.181621	231.667
WBGene00018045	F35D11.4	18.3284	13.8969	26.9094	0.339947	233.667
WBGene00009445	F35G12.12	40.9673	30.7663	61.2881	0.193131	104.333
WBGene00009443	F35G12.7	42.2561	26.3164	107.166	0.612777	433
WBGene00009435	F35G2.1	69.6415	45.7807	145.45	0.371578	84.3333
WBGene00009452	F36A2.2	48.1296	37.7379	66.4189	0.156695	141.333
WBGene00009454	F36A2.7	251.422	143.639	1007.18	0.631939	3086.67
WBGene00009456	F36A2.9	37.4305	31.5145	46.0809	0.152633	174.333
WBGene00009469	F36D3.1	31.0678	20.141	67.9102	0.47693	267.667
WBGene00018090	F36D4.5	41.4854	32.492	57.3629	0.261705	795.333
WBGene00009483	F36G3.2	41.4216	32.0584	58.5107	0.303918	132
WBGene00206519	F36H5.13	27.2157	19.2154	46.6302	0.323665	98.6667
WBGene00018103	F36H5.4	44.6557	26.6728	137.066	0.457668	477.667
WBGene00018131	F37A4.1	66.2501	55.8674	81.3727	0.0439347	276.333
WBGene00018132	F37A4.2	34.3249	25.3137	53.2977	0.253535	166
WBGene00018140	F37B4.10	32.5971	23.7031	52.1742	0.34688	405
WBGene00018151	F37C12.3	203.915	81.1784	-398.321	0.542144	1034
WBGene00018159	F37F2.2	33.808	27.739	43.2766	0.203585	469.333
WBGene00009521	F38A1.8	50.3717	40.2567	67.2752	0.189438	771
WBGene00018161	F38A5.2	108.198	81.5808	160.593	0.104948	599
WBGene00009534	F38B7.3	36.1322	25.8482	60.0064	0.363415	322.333
WBGene00009556	F39B2.5	21.8156	15.9326	34.5865	0.453978	112
WBGene00009558	F39B2.8	77.3435	50.1175	169.332	0.469753	127.667
WBGene00018193	F39C12.1	70.0674	49.3874	120.542	0.240394	877
WBGene00023036	F39E9.10	38.7929	32.266	48.6301	0.134763	225
WBGene00271716	F39E9.28	33.4388	26.5489	45.158	0.301607	104
WBGene00018199	F39E9.7	22.4012	17.0502	32.6471	0.272888	264
WBGene00018204	F39F10.4	58.0619	36.8545	136.757	0.661143	164.667
WBGene00018208	F39G3.3	44.8537	36.8055	57.4067	0.194806	502.333
WBGene00009565	F39H11.1	24.1003	20.1217	30.04	0.234679	359.333
WBGene00009563	F39H2.3	29.2407	22.9531	40.2726	0.19924	173.667
WBGene00018226	F40B5.2	31.6578	26.1826	40.0284	0.239692	288
WBGene00009573	F40E10.5	22.3632	14.0941	54.1098	0.484775	81
WBGene00009574	F40E10.6	75.7412	52.7028	134.564	0.376457	444
WBGene00009588	F40F11.3	27.6701	21.7604	37.9865	0.288973	244.333
WBGene00018238	F40F4.7	58.8391	37.8221	132.425	0.537196	626.333
WBGene00009575	F40F8.1	17.9434	15.229	21.8352	0.0448304	181.333
WBGene00044916	F40F8.11	37.5746	27.3439	60.0375	0.363466	670.667
WBGene00018241	F40G9.5	70.4056	49.5458	121.603	0.250467	164.667
WBGene00023284	F41B5.1	25.9993	18.5172	43.6277	0.501412	43.6667
WBGene00018302	F41G3.6	23.4944	17.1962	37.0724	0.450141	51
WBGene00018316	F41H10.3	20.1532	17.4705	23.8093	0.0823135	274.333
WBGene00018317	F41H10.4	76.6096	48.0113	189.468	0.468177	370
WBGene00018341	F42A10.5	30.6558	21.7684	51.8071	0.439667	275
WBGene00018328	F42A6.6	31.1784	25.7639	39.4741	0.0586223	114.667
WBGene00009635	F42F12.3	35.5135	25.61	57.9062	0.355312	373
WBGene00018361	F42G8.10	114.368	68.4171	348.295	0.177505	1214.67
WBGene00018366	F42H10.2	27.0885	19.0034	47.1478	0.420631	91
WBGene00018370	F42H10.6	28.4731	23.592	35.901	0.220958	93
WBGene00018373	F43B10.1	44.8173	28.728	101.871	0.496567	108.667
WBGene00219294	F43G6.16	37.4856	22.4676	113.056	0.451838	55.3333
WBGene00009657	F43G6.4	117.108	44.1199	-178.978	0.709902	358.667
WBGene00009660	F43G6.8	49.1198	40.6449	62.0598	0.115572	184
WBGene00009673	F43G9.13	45.3328	32.747	73.6321	0.342444	51
WBGene00018408	F44B9.5	34.8257	29.6568	42.1766	0.14364	191.667
WBGene00018409	F44B9.8	19.5047	14.9355	28.102	0.313486	237
WBGene00018417	F44E2.3	33.0386	27.5174	41.3314	0.175648	401
WBGene00018419	F44E2.6	35.8376	26.492	55.3706	0.308787	142
WBGene00018420	F44E2.7	30.8941	22.7528	48.1075	0.374172	529.667
WBGene00018421	F44E2.8	28.1876	23.5209	35.1644	0.132641	305.333
WBGene00018422	F44E2.9	24.5185	18.0317	38.2948	0.379086	228.667
WBGene00009688	F44E5.1	91.3465	54.8416	273.199	0.40339	419.333
WBGene00018426	F44E7.4	16.8397	13.8061	21.5817	0.164171	197.667
WBGene00018431	F44E7.9	39.8912	34.2233	47.8092	0.161358	671.333
WBGene00009696	F44F1.4	19.7202	15.3857	27.4546	0.255357	96.6667
WBGene00009697	F44F1.5	8.86914	6.88347	12.4649	0.236059	180
WBGene00009698	F44F1.6	17.1362	13.2272	24.3249	0.337571	661
WBGene00009712	F44G4.2	123.395	80.9448	259.47	0.385259	441.333
WBGene00009713	F44G4.3	53.6725	33.0512	142.715	0.492868	130
WBGene00018462	F45E1.1	53.1544	25.6205	-711.759	0.398724	61
WBGene00018482	F45F2.10	29.6407	23.0706	41.4429	0.242869	123
WBGene00009740	F45H10.3	119.948	78.0746	258.686	0.586653	1106.33
WBGene00189958	F45H11.8	37.4916	29.7445	50.6957	0.0567573	100.667
WBGene00009776	F46B6.12	48.1303	30.8228	109.765	0.491641	56.3333
WBGene00009771	F46B6.6	30.1129	23.8044	40.9708	0.19524	135.333
WBGene00009784	F46C5.9	40.6308	30.5862	60.4987	0.296188	308.333
WBGene00018485	F46C8.3	33.7085	25.7912	48.6395	0.290152	923
WBGene00018508	F46F11.1	61.7821	47.7827	87.3837	0.220583	457
WBGene00018518	F46H5.2	24.8235	22.3164	27.9652	0.102517	183
WBGene00018533	F47B7.2	79.6565	66.2835	99.7893	0.0943143	710
WBGene00018564	F47D12.9	21.9283	16.668	32.0402	0.257415	72.6667
WBGene00018578	F47G3.3	15.3402	11.5849	22.698	0.383316	71.3333
WBGene00009825	F47G4.4	34.3015	27.8224	44.7144	0.171772	230.667
WBGene00009831	F47G9.4	27.9406	20.0682	45.9762	0.382621	114.667
WBGene00018593	F48B9.8	29.2751	22.3221	42.5191	0.314598	143
WBGene00018606	F48E3.6	78.323	48.0233	212.222	0.239645	1022
WBGene00018609	F48E8.2	35.641	23.9981	69.2274	0.321046	126.667
WBGene00018610	F48E8.3	107.49	47.7677	-429.515	0.438381	180
WBGene00018611	F48E8.4	68.0563	57.1271	84.1565	0.20212	152
WBGene00044410	F48E8.8	96.968	47.4715	-2273.3	0.401009	96.3333
WBGene00009850	F48F7.5	25.5517	18.2501	42.5925	0.258528	42
WBGene00009880	F49C12.11	89.3964	66.9886	134.33	0.0897442	656
WBGene00009881	F49C12.12	116.013	69.4873	351.075	0.837266	614.333
WBGene00009878	F49C12.9	37.6214	28.2086	56.4621	0.305202	447
WBGene00045433	F49D11.10	36.506	25.397	64.8897	0.487394	136.667
WBGene00009889	F49E11.2	50.4256	34.4028	94.3846	0.138833	85.6667
WBGene00009915	F52A8.1	111.884	70.363	272.947	0.41639	2012.67
WBGene00009923	F52B5.7	20.6361	17.2912	25.5855	0.195845	270.333
WBGene00018674	F52C9.3	38.5996	27.8726	62.7491	0.226424	111
WBGene00009930	F52D10.2	30.2496	23.4369	42.6461	0.28131	354
WBGene00219959	F52D2.14	25.7302	17.6692	47.3176	0.178814	78.3333
WBGene00018689	F52D2.7	55.2167	36.4402	113.912	0.436523	61.6667
WBGene00018702	F52E4.5	178.422	49.0676	-109.044	0.492045	116.333
WBGene00018710	F52G3.1	115.245	68.3237	367.907	0.404794	3519
WBGene00018714	F52H2.1	34.3406	25.9744	50.6567	0.323479	128.333
WBGene00018717	F52H2.5	33.3601	23.4299	57.8996	0.442315	64.3333
WBGene00018734	F53A10.2	36.2416	27.2862	53.9472	0.107157	101
WBGene00009951	F53A2.3	36.8278	26.4546	60.5834	0.353116	357
WBGene00009953	F53A2.9	83.7831	47.5878	349.969	0.43247	157.333
WBGene00018735	F53B1.2	20.4653	17.8562	23.9673	0.14087	102
WBGene00018742	F53B3.3	43.0119	36.0337	53.3419	0.0869719	383.333
WBGene00018743	F53B3.5	77.0514	58.1049	114.332	0.119999	1299
WBGene00009973	F53C11.3	52.6717	37.7831	86.9244	0.340658	627.667
WBGene00009974	F53C11.4	73.175	56.7853	102.864	0.218022	478
WBGene00009975	F53C11.5	38.2417	32.1003	47.289	0.0475497	487.333
WBGene00018758	F53E10.1	44.7129	33.9349	65.5239	0.048043	167.333
WBGene00018762	F53E10.6	26.101	21.6321	32.8971	0.220786	438
WBGene00302980	F53E2.2	110.046	97.93	125.584	0.045004	4131.67
WBGene00009980	F53F1.2	35.9672	28.0363	50.1548	0.22986	232.333
WBGene00018764	F53F10.2	57.9246	48.3046	72.3292	0.110744	436.333
WBGene00009992	F53F4.10	75.3259	60.1425	100.765	0.123763	1285.33
WBGene00009993	F53F4.11	89.5277	56.4585	216.107	0.362463	825
WBGene00009994	F53F4.12	24.706	19.9851	32.3469	0.205213	175.333
WBGene00010002	F53F8.5	42.2326	32.9554	58.7797	0.210191	192
WBGene00018777	F53H1.3	28.8953	24.4868	35.2399	0.122485	58
WBGene00018778	F53H1.4	76.1451	61.1374	100.918	0.184392	3193
WBGene00010006	F53H2.3	51.0448	32.6712	116.642	0.132931	130
WBGene00018784	F54A3.5	122.79	70.9641	455.3	0.605069	292
WBGene00018785	F54A3.6	37.9831	31.3788	48.1083	0.149154	218.667
WBGene00010028	F54B11.5	34.9096	24.9753	57.9669	0.330926	157
WBGene00010013	F54B3.1	85.4728	48.624	352.948	0.433252	667.333
WBGene00018795	F54C4.4	28.8239	21.8774	42.2339	0.273845	257.667
WBGene00010039	F54C8.6	57.871	39.7459	106.385	0.213922	71.6667
WBGene00010040	F54C8.7	29.5807	21.3342	48.2194	0.350479	138.333
WBGene00010044	F54C9.9	28.7907	22.5166	39.9116	0.267061	953
WBGene00010047	F54D1.6	197.46	55.7001	-127.801	0.739755	68
WBGene00010051	F54D5.5	26.844	19.6852	42.1851	0.425775	1756.67
WBGene00010053	F54D5.9	79.2488	55.6202	137.781	0.331729	113.667
WBGene00018802	F54D8.6	28.9277	23.0154	38.9277	0.287303	518
WBGene00010061	F54E12.2	37.5454	25.4307	71.7042	0.36154	123
WBGene00010059	F54E4.3	94.7723	60.2029	222.582	0.122248	326
WBGene00018831	F54E7.9	55.6008	41.4633	84.3668	0.0834531	182.333
WBGene00018836	F54F2.9	29.9391	24.4523	38.6007	0.134288	98.6667
WBGene00018864	F55A12.5	28.7325	23.2144	37.6918	0.20733	164.333
WBGene00010111	F55D12.2	47.0302	31.5249	92.5504	0.278794	95.6667
WBGene00018898	F55F10.1	47.8393	31.4755	99.6422	0.457205	902.667
WBGene00018890	F55F8.2	79.532	60.7781	115.025	0.215156	404
WBGene00018891	F55F8.3	36.8271	28.9111	50.7124	0.246289	321
WBGene00018899	F55G1.1	20.8995	16.9449	27.2618	0.202275	86.3333
WBGene00010131	F55H2.5	27.3531	22.4204	35.0686	0.115138	63.6667
WBGene00010132	F55H2.7	27.8997	19.7858	47.2945	0.43903	50
WBGene00018925	F56A11.5	69.1531	42.0833	193.837	0.527515	134.333
WBGene00010139	F56A8.3	73.1848	61.7368	89.8449	0.0674949	1591.33
WBGene00010140	F56A8.4	37.3655	28.7222	53.4501	0.255112	49.6667
WBGene00010141	F56A8.5	36.0889	26.2761	57.5997	0.202913	61.6667
WBGene00185001	F56A8.9	82.9317	54.2367	176.102	0.390815	516
WBGene00018934	F56B3.11	60.1894	45.5122	88.8393	0.302068	119
WBGene00004824	F56B3.4	31.308	20.4362	66.8952	0.62041	55
WBGene00018955	F56C11.3	20.1569	15.6595	28.2785	0.292598	88.3333
WBGene00018953	F56C9.10	58.7446	40.3669	107.841	0.21943	608
WBGene00018959	F56D1.1	18.8097	13.69	30.0462	0.454979	67.3333
WBGene00018964	F56D2.2	20.3568	15.878	28.3551	0.322948	124
WBGene00018965	F56D2.3	107.555	73.1269	203.242	0.225745	1970.67
WBGene00014772	F56D5.4	100.729	66.1233	211.323	0.252159	335.333
WBGene00010161	F56G4.6	52.6765	33.0755	129.303	0.219501	108.333
WBGene00010177	F57A8.1	155.738	102.944	319.689	0.295113	791.667
WBGene00010189	F57B1.6	66.7844	46.3964	119.137	0.418537	1172.67
WBGene00019005	F57B10.8	36.8848	26.6843	59.7097	0.280536	246.667
WBGene00018996	F57B9.1	29.5408	23.7504	39.0648	0.282567	172.333
WBGene00010197	F57C2.5	52.2392	46.5449	59.521	0.0489356	253.333
WBGene00019011	F57C9.4	23.4183	19.9599	28.3263	0.101147	240.667
WBGene00010221	F57G12.1	78.4651	56.6501	127.603	0.207947	1614.67
WBGene00010229	F58A4.6	16.5856	12.7233	23.8149	0.338903	115.667
WBGene00010231	F58B3.4	68.6835	44.6225	149.056	0.489987	568.333
WBGene00010232	F58B3.6	33.1361	25.4811	47.3659	0.291384	591
WBGene00010258	F58E6.11	54.9253	38.9887	92.8969	0.33544	60.6667
WBGene00019061	F58F12.1	238.193	143.447	701.594	0.227666	2238.33
WBGene00010269	F58G1.7	9.05837	6.38398	15.5889	0.406821	282.667
WBGene00010286	F58H1.3	30.392	24.1445	41.0014	0.304522	90.3333
WBGene00010288	F58H1.5	14.1875	10.5269	21.751	0.370995	177
WBGene00010305	F59A2.5	24.1609	17.8632	37.3169	0.36466	357
WBGene00019087	F59A6.5	50.6425	39.2228	71.4431	0.253975	1318.33
WBGene00010319	F59B10.3	20.2157	16.534	26.0068	0.195742	324.333
WBGene00010310	F59B2.8	24.7732	22.1648	28.0772	0.111564	260
WBGene00010311	F59B2.9	28.0358	20.2013	45.7972	0.359192	131
WBGene00019102	F59C12.3	100.672	58.5054	360.485	0.412691	1590.67
WBGene00010330	F59D12.2	50.9168	35.5847	89.4628	0.16839	56.3333
WBGene00019118	F59E12.1	37.0922	28.4819	53.1642	0.255146	379
WBGene00019124	F59E12.9	48.7203	33.6987	87.9053	0.282367	922.333
WBGene00010338	F59F4.3	32.962	29.894	36.7317	0.0751354	107.667
WBGene00013232	faah-4	48.9123	32.4313	99.452	0.547974	86.3333
WBGene00015310	fan-1	40.9066	27.9131	76.532	0.405222	188
WBGene00017349	farl-11	38.1904	31.3423	48.8677	0.196002	396.333
WBGene00001498	fars-3	32.6286	25.5658	45.0835	0.278166	276.333
WBGene00001393	fat-1	66.5029	43.8689	137.387	0.621312	99
WBGene00001396	fat-4	315.879	153.177	-5080.31	0.19989	594
WBGene00001404	fbp-1	62.3536	47.4081	91.061	0.0685795	156
WBGene00007162	fbxa-153	14.1537	11.5186	18.3519	0.275591	59
WBGene00013453	fbxa-83	21.3304	17.5036	27.2988	0.14223	335.667
WBGene00013403	fbxb-100	63.5011	42.6166	124.525	0.58807	318
WBGene00020537	fbxb-37	34.8586	26.6665	50.316	0.225606	304.667
WBGene00019703	fbxb-41	33.8517	25.0683	52.1096	0.368395	247.333
WBGene00019705	fbxb-45	36.8078	28.6105	51.5887	0.286702	600
WBGene00044066	fbxb-66	53.8309	35.3582	112.721	0.703571	2158.67
WBGene00014149	fbxb-70	33.3241	28.3424	40.4305	0.110025	138.333
WBGene00021204	fbxb-77	31.8649	25.1284	43.5365	0.224209	252.667
WBGene00017116	fbxb-78	18.0917	14.3533	24.4633	0.254164	144.333
WBGene00009861	fbxb-8	45.7444	27.2	143.753	0.476896	284.333
WBGene00017117	fbxb-80	19.2237	14.0325	30.5107	0.368207	328.333
WBGene00011267	fbxb-85	34.2679	24.6316	56.2888	0.366579	147.667
WBGene00016359	fbxb-88	38.8817	30.6157	53.2621	0.242116	497.667
WBGene00044692	fbxb-91	37.8799	27.1583	62.5886	0.31139	187.667
WBGene00016886	fbxb-96	44.9079	33.4533	68.2911	0.265709	100.333
WBGene00019591	fbxc-25	65.3251	39.9535	178.985	0.467762	586.333
WBGene00019921	fbxc-34	26.0909	20.1027	37.1601	0.30161	1268
WBGene00019918	fbxc-36	32.309	24.5108	47.3847	0.32563	613
WBGene00016295	fbxc-40	30.1386	24.0463	40.3657	0.268075	533.333
WBGene00021576	fbxc-51	43.7585	31.8846	69.7237	0.348882	1887
WBGene00017744	fbxc-54	47.7005	31.0345	103.027	0.390912	118.667
WBGene00012767	fcd-2	35.3165	27.0002	51.0363	0.31695	186
WBGene00001405	fce-1	59.2712	49.3648	74.1518	0.0458942	268.333
WBGene00001406	fce-2	42.1145	28.7732	78.5241	0.144323	113.333
WBGene00018974	fcho-1	50.9101	33.9817	101.447	0.398814	201.667
WBGene00009479	fcp-1	44.9598	32.6749	72.048	0.298813	329.667
WBGene00011058	fdps-1	30.1078	22.1469	47.0037	0.37411	134.667
WBGene00010645	fecl-1	58.2218	36.1855	148.898	0.0736254	64.6667
WBGene00001410	feh-1	96.8336	42.7187	-362.979	0.293059	64.3333
WBGene00001411	fem-1	23.8275	16.6363	41.969	0.468032	135.667
WBGene00019207	fgt-1	113.343	83.5865	175.995	0.282912	597.667
WBGene00016735	fhod-1	52.1609	40.704	72.5935	0.0883482	249
WBGene00001423	fib-1	73.6774	47.8685	159.877	0.423683	2604.67
WBGene00014004	fic-1	61.6455	52.8291	73.994	0.0753468	481
WBGene00017981	figl-1	23.7984	20.0531	29.2638	0.203941	116.667
WBGene00007912	figo-1	63.6016	39.0338	171.618	0.405498	113.333
WBGene00017988	fipp-1	32.8197	24.9808	47.8282	0.30153	742.333
WBGene00001425	fis-2	24.7553	19.8295	32.9373	0.256173	333.667
WBGene00044094	fitm-2	29.678	22.529	43.4731	0.322638	217.667
WBGene00001426	fkb-1	102.206	81.4531	137.148	0.29045	2525.67
WBGene00001427	fkb-2	128.471	95.2399	197.319	0.227935	5407.33
WBGene00001431	fkb-6	74.0987	53.9601	118.22	0.376035	1556.67
WBGene00001434	fkh-2	17.827	13.3765	26.7156	0.36904	319.333
WBGene00001439	fkh-7	29.4221	23.2957	39.9208	0.257378	623.667
WBGene00018998	flap-1	32.9302	27.2439	41.6162	0.207935	267.667
WBGene00017699	flcn-1	119.675	65.7731	663.065	0.645117	1982
WBGene00013407	fld-1	125.185	57.0658	-646.316	0.649246	197
WBGene00012435	flh-1	21.8408	15.988	34.4536	0.379959	2359.67
WBGene00016138	flh-2	77.4235	65.7752	94.0854	0.123147	1047.33
WBGene00012436	flh-3	18.2402	12.8257	31.566	0.452984	697.667
WBGene00001443	fli-1	37.9405	23.2672	102.72	0.662291	129
WBGene00022048	fln-1	54.2552	34.0873	132.866	0.343194	88.3333
WBGene00016006	fln-2	91.539	58.4094	211.502	0.449084	369
WBGene00008973	flwr-1	147.753	92.1393	372.718	0.191724	1173.67
WBGene00001475	fmi-1	167.093	71.9863	-520.257	0.238599	893.667
WBGene00020935	fnci-1	75.5254	64.2035	91.6952	0.0535701	529
WBGene00020208	fnip-2	28.465	22.0424	40.169	0.330938	265.333
WBGene00019823	fnta-1	26.9776	18.9945	46.536	0.385456	128.667
WBGene00006465	fntb-1	40.8831	30.8265	60.6784	0.353486	367
WBGene00001484	fox-1	46.2467	34.9352	68.3904	0.303285	1031
WBGene00001485	fre-1	31.2846	23.2672	47.732	0.321938	81
WBGene00014177	frg-1	32.6836	23.7173	52.5501	0.328413	503.667
WBGene00021698	frl-1	26.4749	23.8771	29.7071	0.0799616	286
WBGene00001488	frm-1	55.182	39.7056	90.4295	0.285334	684
WBGene00001496	frm-10	23.5719	17.6719	35.3857	0.428112	205.333
WBGene00001489	frm-2	40.01	34.8334	46.9939	0.14176	923
WBGene00001491	frm-4	70.5039	54.8543	98.6475	0.254532	233.333
WBGene00001493	frm-7	29.2232	22.9801	40.1237	0.29907	190.333
WBGene00001499	fsn-1	64.3839	39.2202	179.644	0.507414	204
WBGene00001502	ftt-2	100.879	82.7383	129.209	0.0991023	5248
WBGene00007534	fubl-1	70.8536	52.257	109.999	0.297991	2737
WBGene00022738	fubl-2	33.4433	27.6369	42.3382	0.146266	91
WBGene00016489	fubl-3	35.2922	29.5258	43.8576	0.185864	612
WBGene00001503	fum-1	52.0222	34.4966	105.745	0.231838	150.333
WBGene00016173	fust-1	95.7847	80.1545	118.987	0.0848246	3133
WBGene00006402	fut-3	33.68	24.9411	51.8456	0.0521836	106
WBGene00001509	fzo-1	42.8812	35.0702	55.1686	0.225534	249.333
WBGene00001510	fzr-1	33.1	26.4832	44.1242	0.204701	866.333
WBGene00001511	fzy-1	61.2064	48.2457	83.6884	0.198486	960
WBGene00001513	gad-1	22.268	17.6712	30.0969	0.287696	244.333
WBGene00018561	gadr-3	37.8228	31.8252	46.606	0.180799	383.333
WBGene00009823	gadr-6	25.5761	20.9237	32.8888	0.202422	267.667
WBGene00018516	gakh-1	47.3599	34.8627	73.8234	0.280256	173.667
WBGene00001516	gap-2	36.2761	28.6456	49.4479	0.191601	391.333
WBGene00001744	gars-1	48.5694	37.7484	68.0874	0.130905	135.333
WBGene00001520	gas-1	108.062	76.2469	185.441	0.119185	618
WBGene00007703	gbf-1	133.416	89.588	261.197	0.551431	375
WBGene00001522	gbh-1	31.475	23.3213	48.3952	0.258209	98.6667
WBGene00002220	gcc-1	29.4375	23.5278	39.3117	0.250403	339.667
WBGene00011503	gcc-2	33.9984	31.1618	37.403	0.079867	228
WBGene00001526	gck-1	31.5557	28.209	35.8032	0.0994253	285.333
WBGene00022603	gck-2	90.2309	66.1956	141.671	0.301127	530.333
WBGene00007287	gck-4	35.3052	27.6554	48.8053	0.302969	379
WBGene00013382	gcl-1	38.1033	28.7608	56.4357	0.136237	129
WBGene00013591	gcn-2	38.3557	26.6846	68.1723	0.335765	159.333
WBGene00022694	gcna-1	46.8488	35.8583	67.554	0.217992	688.667
WBGene00009918	gcsh-2	70.0537	52.7412	104.286	0.248661	412.667
WBGene00017765	gcst-1	38.1388	27.4626	62.3954	0.359549	165
WBGene00020131	gcy-28	47.7091	34.9016	75.3651	0.355285	119.667
WBGene00001558	gdi-1	107.838	80.6263	162.775	0.209222	1045.33
WBGene00001570	gei-13	38.4113	27.5911	63.1933	0.308883	428.667
WBGene00001574	gei-17	34.9509	29.9239	42.0081	0.165499	386.667
WBGene00001561	gei-4	78.9992	73.3106	85.6447	0.0815314	3324.33
WBGene00001563	gei-6	43.1168	32.0264	65.9572	0.253687	877.333
WBGene00001565	gei-8	30.323	26.0684	36.2371	0.15385	606
WBGene00001577	gem-4	40.0283	30.6947	57.5185	0.300736	391
WBGene00020442	gen-1	14.9365	12.0262	19.705	0.267983	82.3333
WBGene00019813	ger-1	32.8388	25.9444	44.7236	0.182605	126.667
WBGene00001579	gex-2	43.2914	36.6	52.9769	0.153952	781.667
WBGene00001580	gex-3	26.6226	21.6981	34.4384	0.202126	425
WBGene00008546	gfat-1	51.5381	40.1108	72.0705	0.107341	200
WBGene00001582	gfi-2	51.5754	40.4482	71.148	0.188603	708.333
WBGene00001585	gfl-1	25.5025	21.3716	31.6129	0.181978	510
WBGene00009246	gfm-1	62.7345	40.4351	139.871	0.393428	217.333
WBGene00015099	ggtb-1	25.1508	17.662	43.6652	0.416109	241.333
WBGene00001589	gip-1	41.1984	30.6195	62.9457	0.277704	226
WBGene00008805	git-1	45.8978	37.8682	58.2489	0.192844	330.667
WBGene00011237	gkow-1	17.5287	14.5055	22.1441	0.186639	395.333
WBGene00001596	gld-2	46.8963	34.4179	73.5694	0.162036	231.333
WBGene00014115	gld-4	80.8946	54.4029	157.675	0.332421	232.333
WBGene00018878	glit-1	37.3629	29.9101	49.7623	0.24943	1105.67
WBGene00001602	gln-1	42.1588	32.4273	60.2353	0.260433	143
WBGene00001604	gln-3	201.315	69.4418	-223.921	0.0257555	364
WBGene00017195	glo-4	20.0081	17.3267	23.6714	0.178219	58.6667
WBGene00001609	glp-1	22.4342	15.6705	39.4702	0.33409	65.3333
WBGene00006936	glp-4	53.4897	39.0829	84.7192	0.214449	188.667
WBGene00021331	glrx-10	41.6209	28.277	78.8128	0.392219	123.667
WBGene00022663	glrx-21	63.4634	46.1466	101.583	0.268819	107.667
WBGene00044608	glrx-22	25.5128	18.9192	39.1608	0.359483	97.3333
WBGene00017062	glrx-3	27.1308	18.903	48.0415	0.440748	61
WBGene00013029	glrx-5	41.035	35.7148	48.2177	0.0621928	93
WBGene00007975	gls-1	65.4998	42.7153	140.378	0.481881	230.667
WBGene00001635	gly-10	43.6523	34.9946	58.002	0.175378	287.667
WBGene00001636	gly-11	31.7925	22.6576	53.2692	0.474417	178
WBGene00001628	gly-3	53.1416	38.9556	83.5767	0.170508	226.667
WBGene00001630	gly-5	59.1798	40.6565	108.708	0.401386	251.667
WBGene00001632	gly-7	77.6635	59.5281	111.69	0.326597	379.333
WBGene00012934	gly-9	44.9153	29.0818	98.5952	0.55365	91
WBGene00015285	gmeb-1	27.6989	20.797	41.4573	0.299468	204.333
WBGene00013552	gmn-1	37.783	28.0374	57.9134	0.177389	222.667
WBGene00010912	gmps-1	20.1515	16.5342	25.7947	0.191934	72.3333
WBGene00001646	gna-1	48.7226	31.031	113.342	0.382454	175
WBGene00001648	goa-1	126.662	83.1643	265.556	0.412931	1643
WBGene00001649	gob-1	122.512	79.375	268.345	0.714194	204
WBGene00018017	golg-2	30.4909	25.8439	37.1754	0.0317906	264.333
WBGene00010306	golg-4	53.6804	34.4758	121.188	0.444989	560.333
WBGene00001650	gon-1	51.3027	33.2005	112.812	0.382973	158
WBGene00002148	gon-14	34.9004	27.1133	48.9626	0.310042	434.333
WBGene00001653	gon-4	34.2343	28.7098	42.3915	0.180786	470.333
WBGene00001661	gop-2	34.0052	26.1409	48.6371	0.272739	188.667
WBGene00001662	gop-3	31.7029	23.5262	48.5914	0.364501	166.333
WBGene00017273	gos-28	35.9926	25.5643	60.7906	0.329277	123
WBGene00020146	got-1.2	44.1575	29.0524	91.9805	0.295331	102
WBGene00018006	gpaa-1	54.4447	44.057	71.2421	0.0142101	120.333
WBGene00012390	gpap-1	27.9065	18.3922	57.8134	0.433409	76.6667
WBGene00001679	gpb-1	130.814	75.6616	482.599	0.925051	1060.67
WBGene00001680	gpb-2	59.0675	46.6315	80.5487	0.219782	215.333
WBGene00011109	gpch-1	28.1807	23.5519	35.0739	0.169318	269
WBGene00001686	gpd-4	60.2622	41.2412	111.848	0.239367	108
WBGene00010778	gpdh-2	51.4561	33.8567	107.16	0.301054	167.667
WBGene00012031	gpdh-3	42.0818	36.3946	49.8757	0.109494	214.667
WBGene00001687	gpn-1	18.795	15.5677	23.7103	0.218434	103
WBGene00001688	gpr-1	26.2826	22.8171	30.9891	0.156949	366
WBGene00001689	gpr-2	29.0943	21.6094	44.5116	0.291226	327.333
WBGene00011045	gpx-2	36.2746	24.8312	67.2809	0.459348	98.3333
WBGene00013082	grdn-1	61.709	42.2503	114.394	0.449401	1053.33
WBGene00001708	grk-1	38.8451	30.6467	53.0319	0.264329	487.333
WBGene00001745	gsa-1	112.861	70.6932	279.694	0.448359	198.667
WBGene00001746	gsk-3	60.3787	46.5556	85.8772	0.333188	523
WBGene00001747	gsp-1	64.482	59.087	70.961	0.0467374	933.333
WBGene00001748	gsp-2	203.495	125.192	543.327	0.31679	1615.67
WBGene00008117	gsr-1	46.7246	30.281	102.249	0.541718	477.667
WBGene00010941	gss-1	26.919	21.3367	36.4572	0.292664	172.333
WBGene00001749	gst-1	66.144	38.9213	220.061	0.463284	226
WBGene00001768	gst-20	128.471	45.6344	-157.588	0.598146	210.667
WBGene00001791	gst-43	35.2496	26.9917	50.7879	0.125451	81
WBGene00010677	gtbp-1	40.6686	30.3286	61.706	0.307292	1353
WBGene00013736	gtf-2A2	45.734	32.5702	76.7561	0.278937	72.6667
WBGene00013998	gtf-2E1	22.8555	15.4411	43.9676	0.485408	75.6667
WBGene00010054	gtf-2E2	38.5749	27.3489	65.4338	0.35916	795.667
WBGene00015296	gtf-2F1	64.8747	49.8254	92.9492	0.195019	731.667
WBGene00012694	gtf-2F2	39.9497	28.1853	68.5709	0.413129	294
WBGene00019821	gtf-2H1	62.1658	42.3247	117.025	0.302722	244.667
WBGene00020286	gtsf-1	29.4268	23.0588	40.6541	0.271604	389.333
WBGene00020190	guk-1	109.99	92.1315	136.435	0.066408	913
WBGene00001808	gut-2	28.3808	20.4393	46.415	0.371758	825.667
WBGene00016002	gyf-1	33.6632	25.1336	50.9562	0.31899	337.667
WBGene00019143	H01M10.1	27.0782	19.5961	43.803	0.404816	302.667
WBGene00019148	H03E18.1	76.0481	48.5086	175.925	0.441653	161.667
WBGene00019157	H05C05.1	61.9761	50.964	79.0587	0.198899	713
WBGene00019158	H05C05.2	49.0959	37.1645	72.3107	0.254468	432.667
WBGene00044483	H06H21.11	25.6368	19.4186	37.7131	0.274469	121
WBGene00019168	H06I04.3	121.035	74.3703	324.899	0.287347	1820
WBGene00019170	H06I04.6	65.0084	38.2346	216.876	0.303191	152.333
WBGene00019196	H14A12.3	29.3267	25.9739	33.6732	0.105499	262.333
WBGene00019199	H14E04.2	29.2816	24.3132	36.802	0.158236	121.333
WBGene00019204	H14N18.4	38.4753	26.2656	71.8968	0.396778	67.6667
WBGene00019219	H20J04.4	29.1952	20.8667	48.5881	0.380836	150.667
WBGene00019221	H20J04.6	34.2147	27.2385	45.9946	0.214412	176.333
WBGene00010409	H21P03.2	18.7202	13.2436	31.9199	0.510198	95.3333
WBGene00010418	H27A22.1	26.9531	20.6585	38.7647	0.116935	130
WBGene00019248	H27M09.5	24.9961	16.7367	49.3497	0.336573	169.333
WBGene00019250	H28G03.2	73.5859	57.9135	100.888	0.23592	817.667
WBGene00019259	H34C03.2	39.1284	24.2961	100.453	0.573353	114.333
WBGene00019264	H35B03.2	24.1702	17.1003	41.2065	0.362203	155
WBGene00010433	H40L08.1	43.4533	30.2668	77.0003	0.370192	545.667
WBGene00017301	hach-1	37.1738	30.1496	48.4652	0.116252	265.333
WBGene00001812	haf-2	20.2314	16.3828	26.4434	0.105989	78.3333
WBGene00001813	haf-3	31.506	27.686	36.5489	0.0976714	150.667
WBGene00001820	ham-1	15.7352	12.2358	22.0381	0.330696	1589.67
WBGene00001821	ham-2	42.6905	27.922	90.6233	0.570976	233.667
WBGene00044072	ham-3	84.129	63.7151	123.791	0.13117	904
WBGene00007630	har-1	74.2858	59.1112	99.9424	0.166074	756.333
WBGene00002001	hars-1	42.7837	36.6834	51.3176	0.150783	311.667
WBGene00007258	hasp-1	48.553	39.4029	63.2381	0.225708	429.333
WBGene00044069	hat-1	24.3807	18.899	34.3413	0.282104	331.667
WBGene00001824	hbl-1	69.4574	46.8448	134.272	0.424432	2056
WBGene00001827	hcf-1	66.0988	47.9378	106.413	0.239346	582.333
WBGene00001829	hcp-1	33.8027	26.9328	45.3774	0.214792	915.667
WBGene00001830	hcp-2	31.4376	28.7529	34.6752	0.0443282	512
WBGene00001831	hcp-3	22.0143	16.1282	34.666	0.373468	692.667
WBGene00001832	hcp-4	30.1271	22.4173	45.9198	0.356396	949.333
WBGene00001833	hcp-6	52.7591	40.6149	75.2638	0.257867	2110.67
WBGene00001834	hda-1	102.847	69.3074	199.283	0.449016	1222.67
WBGene00001835	hda-2	31.8405	23.6199	48.8377	0.335478	180
WBGene00001837	hda-4	34.682	29.6365	41.798	0.101833	72.6667
WBGene00018319	hda-6	31.4037	22.5295	51.8122	0.338611	377
WBGene00016405	hecd-1	86.6884	53.3739	230.659	0.37663	1338.33
WBGene00001840	hel-1	88.1038	65.765	133.425	0.253855	4949.67
WBGene00021905	helq-1	39.6809	29.6079	60.1419	0.310183	64.6667
WBGene00015767	hex-2	32.2996	26.6368	41.0204	0.0606466	312.333
WBGene00021209	hgap-1	47.5449	38.6352	61.7954	0.193235	198
WBGene00008430	hgap-2	34.1376	27.155	45.9543	0.216678	400.333
WBGene00004101	hgrs-1	31.0736	24.2675	43.1856	0.34282	496.667
WBGene00001851	hif-1	58.5176	43.9849	87.3919	0.366408	502.333
WBGene00001854	hil-3	19.1573	16.2862	23.2572	0.184872	5830.33
WBGene00001855	hil-4	31.1218	24.346	43.1237	0.259469	687.667
WBGene00001856	hil-5	28.0022	18.0341	62.6077	0.280582	145
WBGene00001858	hil-7	103.414	56.4004	621.34	0.623699	20239
WBGene00001860	him-1	71.1246	44.2732	180.745	0.355434	1343
WBGene00001869	him-10	30.5684	22.7911	46.4034	0.320523	740.333
WBGene00001874	him-17	24.8364	21.312	29.7576	0.157689	218.667
WBGene00011415	him-18	29.6293	18.6175	72.5286	0.634814	57.6667
WBGene00001865	him-6	17.4084	12.13	30.8195	0.429426	56
WBGene00009553	hinf-1	45.5917	31.1468	85.0223	0.27684	718.333
WBGene00009002	hint-1	112.674	67.5707	338.873	0.0760764	112
WBGene00011735	hip-1	79.7311	62.7998	109.162	0.174724	664
WBGene00022717	hipr-1	30.168	25.7959	36.3245	0.13634	143.333
WBGene00019627	hira-1	26.318	21.6145	33.638	0.196769	196.333
WBGene00001875	his-1	97.7403	77.8368	131.32	0.165122	1386.33
WBGene00001876	his-2	62.2627	41.5779	123.904	0.311061	1072.67
WBGene00001898	his-24	58.8196	45.5984	82.8385	0.244042	90724
WBGene00001877	his-3	66.7181	45.3795	125.937	0.250706	1278
WBGene00001905	his-31	22.8171	16.2089	38.5222	0.433827	249.667
WBGene00001906	his-32	45.7266	30.9182	87.7591	0.432651	7057.67
WBGene00001911	his-37	41.8504	30.5717	66.3165	0.440655	1271.67
WBGene00001912	his-38	61.6989	40.7864	126.623	0.484999	141.333
WBGene00001878	his-4	83.9807	50.9332	239.153	0.465413	1316.67
WBGene00001914	his-40	53.7458	36.8079	99.56	0.311849	434
WBGene00001922	his-48	56.1981	35.6138	133.167	0.444077	648.667
WBGene00001931	his-57	49.3524	34.4539	86.9519	0.422492	103.333
WBGene00001933	his-59	62.9015	38.5002	171.766	0.528647	2622.67
WBGene00001880	his-6	53.0478	35.6888	103.286	0.373416	1159.67
WBGene00001934	his-60	83.6783	65.0706	117.19	0.224212	3478.67
WBGene00001935	his-61	63.7324	38.59	182.89	0.676317	1334.33
WBGene00001936	his-62	97.4802	58.5316	291.358	0.555596	2097.33
WBGene00001937	his-63	66.2825	37.9421	261.922	0.452807	1290.67
WBGene00001938	his-64	67.4377	57.2497	82.0367	0.062534	2404.67
WBGene00001941	his-67	47.039	33.9338	76.6354	0.284312	422.667
WBGene00001942	his-68	39.2561	27.8122	66.7024	0.316644	2056.33
WBGene00001881	his-7	79.1927	58.0362	124.622	0.111669	462
WBGene00001945	his-71	155.791	88.9564	626.47	0.175199	1213.67
WBGene00011904	hlb-1	40.9334	33.875	51.7073	0.196339	930
WBGene00001958	hlh-14	11.3557	8.74778	16.179	0.275898	502.667
WBGene00001949	hlh-2	22.6554	17.5726	31.875	0.321392	1389
WBGene00001950	hlh-3	17.9105	14.4959	23.4295	0.252903	223.667
WBGene00020930	hlh-30	74.4856	51.9327	131.663	0.293426	318
WBGene00001952	hlh-6	39.5976	24.2376	108.11	0.420357	275.333
WBGene00001971	hmg-1.1	112.707	81.804	181.134	0.225005	39096
WBGene00001972	hmg-1.2	63.8117	43.1092	122.77	0.433512	5627.67
WBGene00001975	hmg-5	82.7024	71.9515	97.2304	0.142676	328
WBGene00017268	hmgr-1	27.0621	20.1806	41.0652	0.222411	125.667
WBGene00017769	hmgs-1	26.7321	20.7924	37.4224	0.300918	286.667
WBGene00001978	hmp-1	50.5104	41.727	63.9775	0.195539	1498.33
WBGene00001979	hmp-2	37.6122	31.4911	46.6871	0.162217	305.333
WBGene00001980	hmr-1	42.091	34.354	54.3259	0.207292	1042.33
WBGene00001981	hnd-1	26.9164	15.1757	118.914	0.311809	183
WBGene00001983	hoe-1	53.2865	37.9304	89.5347	0.360863	72
WBGene00016704	hosl-1	42.215	30.4837	68.6246	0.3625	256.333
WBGene00001994	hpk-1	124.208	106.597	148.788	0.0917982	1556.67
WBGene00001995	hpl-1	33.4142	24.0997	54.4644	0.314307	383.667
WBGene00001996	hpl-2	34.8201	25.6675	54.1175	0.428378	603.333
WBGene00017158	hpo-10	39.0704	32.5139	48.9389	0.179953	500
WBGene00010427	hpo-11	47.1874	33.962	77.2828	0.317999	471.667
WBGene00016588	hpo-12	45.5662	37.3827	58.3369	0.169608	359
WBGene00013670	hpo-13	29.845	23.2697	41.5999	0.270103	133.333
WBGene00020268	hpo-19	41.9387	33.5209	56.0019	0.304663	111.667
WBGene00016418	hpo-27	24.3056	20.2255	30.4479	0.191918	72.6667
WBGene00021754	hpo-29	88.4499	55.1515	223.224	0.327941	772.333
WBGene00010089	hpo-31	35.7874	27.9425	49.7565	0.088328	107
WBGene00009744	hpo-35	39.3298	32.0926	50.7814	0.195217	194.667
WBGene00020517	hpo-8	141.928	88.0813	365.158	0.31651	581.333
WBGene00015463	hpo-9	16.8489	13.7366	21.7846	0.262027	174.333
WBGene00001998	hpr-17	14.2435	10.7429	21.1284	0.417788	61
WBGene00020403	hrde-4	43.6921	33.9577	61.2505	0.118299	141.333
WBGene00009164	hrdl-1	20.9472	16.1664	29.7429	0.289546	117.333
WBGene00019830	hrg-1	32.5128	27.4483	39.8691	0.10875	245.333
WBGene00001999	hrpa-1	82.7523	67.0769	107.988	0.122337	8966.33
WBGene00019249	hrpa-2	100.053	75.7295	147.393	0.222164	2096.67
WBGene00020936	hrpf-1	35.2219	28.6405	45.7305	0.178626	438.333
WBGene00022253	hrpf-2	31.5893	28.3033	35.7384	0.117361	577.333
WBGene00017816	hrpk-1	76.696	57.3421	115.771	0.204106	875.667
WBGene00015557	hrpk-2	24.1348	18.7625	33.818	0.281751	93.6667
WBGene00016624	hrpl-1	43.2686	27.6742	99.1264	0.412291	328
WBGene00002000	hrpr-1	134.002	79.8966	415.117	0.53547	3632.33
WBGene00012769	hrpu-1	45.7881	38.2825	56.9546	0.17457	645
WBGene00022134	hrpu-2	67.7759	44.8274	138.865	0.287198	1057
WBGene00002003	hse-5	62.9228	48.6412	89.077	0.110323	257
WBGene00002004	hsf-1	30.1963	25.5985	36.8073	0.181571	224.333
WBGene00002005	hsp-1	111.651	75.3395	215.528	0.413334	1619
WBGene00016250	hsp-110	34.3807	28.8483	42.5386	0.204805	315.333
WBGene00002011	hsp-12.2	128.952	59.8405	-832.333	0.719775	496.333
WBGene00002015	hsp-16.1	26.2896	20.711	35.9815	0.239553	426.667
WBGene00002016	hsp-16.2	34.8349	24.1935	62.188	0.252315	440.667
WBGene00002018	hsp-16.41	30.3844	21.0011	54.9252	0.392692	839
WBGene00002008	hsp-4	46.9356	38.6714	59.6918	0.235046	699.333
WBGene00002027	hsr-9	40.2219	32.7809	52.0328	0.163071	1535.33
WBGene00002029	hst-2	35.1202	25.7472	55.2242	0.346338	243.333
WBGene00002031	hst-6	31.2879	23.7381	45.8795	0.289084	316.333
WBGene00002035	hum-1	32.6554	22.1082	62.4477	0.580916	296.333
WBGene00002036	hum-2	44.1648	31.6493	73.0531	0.344288	355
WBGene00002039	hum-6	53.9557	34.5051	123.667	0.153102	88.3333
WBGene00013740	hut-1	30.0685	24.4343	39.0797	0.263059	251.667
WBGene00022306	hxk-3	48.1024	32.9923	88.7479	0.457235	342
WBGene00002043	hyl-1	64.4346	53.1453	81.8138	0.0583219	854.333
WBGene00002044	hyl-2	63.4081	32.638	1107.93	0.420319	109.667
WBGene00015466	hyls-1	27.3264	22.9967	33.6645	0.164886	297.667
WBGene00002045	icd-1	238.43	139.199	830.418	0.164672	1987.33
WBGene00022042	icd-2	251.267	149.414	789.377	0.474801	4375.33
WBGene00002046	icln-1	40.2636	36.6124	44.7236	0.0787325	168.667
WBGene00002047	icp-1	25.1157	18.3623	39.7264	0.420691	1158.67
WBGene00010317	idh-1	58.183	48.0328	73.7724	0.117994	1391.33
WBGene00007942	idh-2	57.0299	44.8853	78.184	0.130051	208.667
WBGene00007993	idhb-1	137.342	83.2033	393.163	0.808722	371.667
WBGene00009440	idhg-1	123.098	78.0611	290.97	0.345745	637.333
WBGene00002060	ife-2	46.5064	32.3199	82.8904	0.441723	1176.67
WBGene00002061	ife-3	28.2944	18.5996	59.0982	0.458549	91.3333
WBGene00002062	ife-4	26.777	21.5731	35.2897	0.251958	589.333
WBGene00004132	ifet-1	40.3539	34.1224	49.3698	0.199358	848.333
WBGene00002065	iff-2	289.77	167.291	1081.76	0.349449	4646
WBGene00021857	iffb-1	54.4536	45.0295	68.8665	0.233881	401.333
WBGene00002066	ifg-1	75.9983	54.0114	128.176	0.262113	1825.33
WBGene00002068	ify-1	14.4251	11.3065	19.9193	0.32348	612
WBGene00018215	igcm-1	29.0724	26.3041	32.4919	0.010862	795.667
WBGene00020160	igcm-3	63.8691	61.0463	66.9657	0.0211565	4909.33
WBGene00022418	igcm-4	17.8618	14.6078	22.9811	0.230602	1088.33
WBGene00007736	igdb-2	51.7378	35.7479	93.6082	0.352933	188.667
WBGene00022580	iglr-2	76.9574	61.6706	102.32	0.14973	496
WBGene00002069	ikb-1	42.7145	33.872	57.8049	0.24461	267.667
WBGene00013415	ilcr-1	22.6895	17.3479	32.7841	0.342588	50.6667
WBGene00002070	ile-1	48.8105	42.1813	57.9118	0.119227	706
WBGene00002071	ile-2	63.4432	43.4133	117.788	0.37207	459.333
WBGene00009354	ilkp-1	30.2636	26.2014	35.8166	0.112211	119.667
WBGene00002074	ima-3	41.0117	37.8592	44.7369	0.0757272	570.333
WBGene00002075	imb-1	34.6479	27.1042	48.0103	0.291803	201.333
WBGene00002076	imb-2	37.3875	29.5331	50.9331	0.206595	228
WBGene00002077	imb-3	47.2215	33.0573	82.6238	0.414979	711
WBGene00007021	immp-1	20.7032	15.2939	32.033	0.363333	166
WBGene00020511	immt-1	68.8681	55.3321	91.1715	0.177817	297
WBGene00007979	imp-1	35.1838	29.0004	44.7186	0.028955	285
WBGene00011481	imp-2	52.2356	49.1551	55.728	0.0632752	1912
WBGene00016378	imp-3	31.0221	27.7254	35.2085	0.020682	129.667
WBGene00010908	imph-1	33.8075	20.9352	87.7799	0.410275	66.3333
WBGene00002081	ina-1	33.5747	27.7004	42.6109	0.175158	1699.33
WBGene00002083	inf-1	76.2827	52.2645	141.147	0.373258	2414.33
WBGene00008848	inft-2	27.7485	22.4909	36.2139	0.191988	84.6667
WBGene00013095	ing-3	33.8484	23.6443	59.547	0.35373	176
WBGene00002085	ins-2	26.3096	19.2067	41.7489	0.353804	1220.67
WBGene00002117	ins-34	41.4989	31.2103	61.9066	0.219347	162.667
WBGene00016871	inso-1	53.6596	39.3943	84.1211	0.320846	569.667
WBGene00015499	ints-1	30.6793	24.8917	39.9737	0.191611	246.333
WBGene00008642	ints-11	17.8894	15.1746	21.787	0.127389	150.667
WBGene00013877	ints-2	38.5014	29.4207	55.6902	0.101299	154.333
WBGene00022360	ints-3	63.6276	30.2974	-635.625	0.490507	89.6667
WBGene00012234	ints-4	33.1522	25.6626	46.8151	0.326314	352
WBGene00000994	ints-6	30.4615	26.5719	35.6851	0.139912	144
WBGene00013021	ints-8	41.8429	28.6313	77.6935	0.449395	109.333
WBGene00017608	ints-9	39.6119	32.4313	50.8766	0.170664	253
WBGene00002132	inx-10	28.7264	23.6354	36.6127	0.122085	94.6667
WBGene00002133	inx-11	57.4033	40.4138	99.0376	0.245094	110
WBGene00002134	inx-12	112.082	52.4427	-816.808	0.271307	116
WBGene00002124	inx-2	72.6309	56.7234	100.938	0.230342	4467.33
WBGene00002125	inx-3	87.2189	70.9713	113.114	0.172843	5625
WBGene00002128	inx-6	90.2581	45.5312	5109.92	0.467169	195.667
WBGene00002129	inx-7	89.846	61.3143	168.042	0.597179	461.667
WBGene00012319	ipla-3	59.1444	42.4446	97.5095	0.364501	159.333
WBGene00002147	ire-1	39.2747	33.6089	47.2381	0.123749	255.333
WBGene00007984	irx-1	28.9774	20.9845	46.8055	0.363389	371.333
WBGene00012885	iscu-1	28.4723	24.6068	33.7785	0.135734	391.333
WBGene00018356	islo-1	29.4757	21.2326	48.1812	0.295831	143.667
WBGene00002162	isp-1	159.151	101.816	364.301	0.167034	2272.67
WBGene00010736	istr-1	58.7959	47.8235	76.3023	0.141951	434
WBGene00002169	isw-1	38.915	31.3712	51.2357	0.190973	861.333
[truncated: 2,702 more rows]

## Sheet: Legend
This table lists the pharynx-specific mRNA half-lives calculated for each gene from our single-cell RNA sequencing data that met our moderate filtering criteria. Half-lives corresponding to the upper and lower limits of a 95% confidence interval are also included. The half_life_coefficient_of_variation column corresponds to the coefficient of variation calculated for half-lives across all three b…
